# Supplementary material
Source: PubMed Central journal article supplement (PMC6728159)
Supplement: EMS83335-supplement-Supplementary_Material.pdf [file EMS83335-supplement-Supplementary_Material.pdf]

## Data File 1. Significance of metabolite release and uptake. Related to Figure 1.

| metabolite                                    | liver | portal | colon | pancreas | spleen | head | leg | heart | lung | kidney | ear | # of significance |
|-----------------------------------------------|-------|--------|-------|----------|--------|------|-----|-------|------|--------|-----|-------------------|
| not significant                               |       |        |       |          |        |      |     |       |      |        |     | 0                 |
| significant release                           |       |        |       |          |        |      |     |       |      |        |     | 1                 |
| significant uptake                            |       |        |       |          |        |      |     |       |      |        |     | -1                |
| 1-methyladenosine                             | 0     | 0      | 0     | 0        | 0      | 0    | 0   | 0     | 0    | -1     | 0   | 1                 |
| 1-methyl-histidine                            | 1     | -1     | -1    | -1       | 0      | 0    | 0   | 0     | 0    | 0      | 0   | 4                 |
| 2_3-dihydroxybenzoic acid                     | 0     | 0      | 0     | 0        | -1     | 0    | 0   | 0     | 0    | -1     | -1  | 3                 |
| 2-3-Pyridinedicarboxylic acid                 | 0     | 0      | -1    | 0        | 0      | 0    | 0   | 0     | 0    | 0      | 0   | 1                 |
| 2-aminooctanoic acid                          | 0     | -1     | -1    | 0        | -1     | 0    | 0   | 0     | 0    | 0      | 0   | 3                 |
| 2-dehydrogluconate                            | 0     | 0      | 0     | 0        | 1      | 0    | 0   | 0     | 0    | -1     | 0   | 2                 |
| 2-Deoxy-D-ribose                              | 0     | -1     | 0     | 0        | -1     | 0    | 0   | 0     | 0    | -1     | 0   | 3                 |
| 2-hydroxy Hippuric Acid                       | 0     | 0      | 0     | 0        | 0      | 0    | -1  | 0     | 0    | -1     | 0   | 2                 |
| 2-hydroxybutyrate                             | 1     | 0      | 0     | 0        | 0      | 0    | 0   | 0     | 0    | 0      | 1   | 2                 |
| 2-hydroxy-isocaproate                         | 0     | 0      | 0     | 1        | 1      | 1    | 1   | 0     | 0    | 0      | 0   | 4                 |
| 2-hydroxy-isovalerate                         | 0     | 0      | 0     | 0        | 0      | 0    | 1   | 0     | 0    | -1     | 0   | 2                 |
| 2-Hydroxyoctanoic acid                        | 0     | 0      | 0     | 0        | 0      | 0    | 1   | 0     | 0    | 0      | 0   | 1                 |
| 2-Isopropylmalic acid                         | 1     | 0      | -1    | 0        | 0      | -1   | 0   | 0     | 0    | 0      | 0   | 3                 |
| 2-Ketobutyric acid                            | 0     | 0      | -1    | 0        | 0      | 0    | 0   | 0     | 0    | 0      | 0   | 1                 |
| 2-Keto-isocaproate                            | 0     | -1     | -1    | 0        | -1     | 0    | 1   | 0     | 0    | 0      | 0   | 4                 |
| 2-Keto-isovalerate                            | 0     | -1     | -1    | 0        | -1     | 0    | 0   | 0     | 0    | 0      | 0   | 3                 |
| 2-Methylbutyrylglycine                        | 0     | 0      | 0     | 0        | 0      | 0    | 0   | 0     | 0    | -1     | 0   | 1                 |
| 2-Methylhippuric acid                         | 0     | -1     | -1    | 0        | 0      | -1   | 0   | 0     | 0    | -1     | 0   | 4                 |
| 2-Oxoadic acid                                | 0     | 0      | 0     | 0        | 0      | 0    | 0   | 0     | 0    | 0      | 0   | 0                 |
| 2-Phenylpropionic acid                        | -1    | 1      | 1     | 0        | -1     | 0    | 0   | 0     | 1    | 0      | 0   | 5                 |
| 3-(3-Methoxyphenyl)propionic acid             | 0     | 0      | 0     | 0        | 0      | 0    | 0   | 0     | 0    | 0      | 0   | 0                 |
| 3-4-Dihydroxybenzeneacetic acid               | 0     | 0      | 0     | 0        | 0      | 0    | 0   | 0     | 0    | 0      | 0   | 0                 |
| 3-4-Dihydroxyhydrocinnamic acid               | 0     | 0      | 0     | 0        | 0      | 0    | 1   | 0     | 0    | -1     | 0   | 2                 |
| 3-Hydroxyanthranilic acid                     | 1     | 0      | 0     | 0        | 0      | 0    | 0   | 0     | -1   | 0      | 1   | 3                 |
| 3-Hydroxybenzoic acid                         | 0     | 0      | 0     | 0        | -1     | 0    | 0   | 0     | 0    | -1     | 0   | 2                 |
| 3-hydroxybutyrate                             | 0     | 0      | 1     | 0        | 0      | 0    | -1  | 0     | -1   | -1     | 0   | 4                 |
| 3-hydroxyisobutyrate                          | 1     | -1     | 0     | -1       | -1     | 0    | -1  | 0     | 0    | -1     | 0   | 6                 |
| 3-Hydroxyphenyllactate                        | 0     | 0      | 0     | 0        | 0      | 0    | 1   | 0     | 0    | -1     | 0   | 2                 |
| 3-Methoxytyramine                             | 0     | 0      | 0     | 0        | 0      | 0    | 0   | 0     | 0    | -1     | 0   | 1                 |
| 3-Methylindole                                | 0     | 0      | 0     | 0        | 0      | 0    | 0   | 0     | 0    | 0      | 0   | 0                 |
| 3-phenylpropanoic acid                        | -1    | 1      | 1     | 0        | 0      | 0    | 0   | -1    | 0    | 0      | 0   | 4                 |
| 4-Aminhippuric acid                           | 0     | -1     | 0     | 0        | 0      | 0    | 0   | 0     | 0    | -1     | 0   | 2                 |
| 4-Methylvaleric acid                          | 0     | 0      | 0     | 0        | 0      | 0    | 0   | 0     | 0    | 0      | 0   | 0                 |
| 4-Pyridoxic acid                              | 1     | 0      | 0     | 0        | 0      | 0    | 0   | 0     | 0    | -1     | -1  | 3                 |
| 5-Hydroxylysine                               | 0     | -1     | -1    | -1       | 0      | 0    | 0   | 0     | 0    | 0      | 1   | 4                 |
| 5-Keto-D-gluconic acid                        | 0     | 0      | 0     | 0        | 0      | 0    | -1  | 0     | -1   | -1     | 0   | 3                 |
| 5-Methylcytidine                              | 1     | 0      | 0     | 0        | 0      | 0    | 0   | 0     | 0    | -1     | 0   | 2                 |
| 5-Methylcytosine                              | 0     | 0      | 0     | 0        | 0      | 0    | -1  | 0     | 0    | -1     | 0   | 2                 |
| acetate                                       | -1    | 1      | 1     | 0        | -1     | 1    | -1  | 0     | 0    | 0      | 0   | 6                 |
| acetoacetate                                  | 1     | 0      | 0     | 1        | -1     | 0    | -1  | 0     | -1   | -1     | 0   | 6                 |
| acetyl carnitine C2                           | 0     | 0      | 0     | 0        | 0      | 0    | -1  | 1     | 0    | 0      | 0   | 2                 |
| acetylcholine                                 | 0     | -1     | -1    | 0        | 0      | 0    | 0   | 0     | 0    | 0      | 0   | 2                 |
| acetyl-isoleucine                             | 0     | 0      | 0     | -1       | -1     | 0    | 0   | 0     | 0    | -1     | 0   | 3                 |
| acetylylsine                                  | 0     | 0      | 0     | 0        | 0      | 0    | 0   | 0     | 0    | -1     | 0   | 1                 |
| acetyl-valine                                 | 1     | 0      | 0     | 0        | -1     | 0    | 0   | 0     | 0    | -1     | 0   | 3                 |
| aconitate                                     | 1     | 0      | -1    | 0        | -1     | 0    | 0   | 0     | 1    | -1     | 0   | 5                 |
| adenosine                                     | 0     | 0      | 0     | 0        | -1     | 0    | 0   | 0     | 0    | 0      | 0   | 1                 |
| a-ketoglutarate                               | 0     | 1      | 1     | 1        | 1      | 1    | 1   | 0     | 0    | -1     | 0   | 6                 |
| alanine                                       | 0     | 0      | -1    | 0        | 0      | 0    | 0   | 0     | 0    | 0      | 0   | 1                 |
| allantoate                                    | 0     | 0      | 0     | 0        | 0      | -1   | 0   | 0     | 0    | 1      | 0   | 2                 |
| allantoin                                     | 1     | -1     | -1    | -1       | -1     | 0    | 0   | 0     | 0    | -1     | -1  | 7                 |
| aminoadic acid                                | 0     | 0      | 0     | 0        | -1     | 0    | 0   | 0     | 0    | -1     | 0   | 2                 |
| aminolevulinic acid                           | 0     | 0      | -1    | 0        | -1     | 0    | 1   | 0     | 0    | -1     | 0   | 4                 |
| anthranilate                                  | 0     | 0      | 0     | 0        | 0      | 0    | 0   | 0     | 0    | 0      | 0   | 0                 |
| arachidoyl carnitine eicosanoyl carnitine C20 | 0     | 0      | 0     | 0        | 0      | 0    | 1   | 0     | -1   | 0      | 0   | 2                 |
| arginine                                      | 0     | 0      | 0     | 0        | 0      | 0    | 0   | 0     | 0    | 0      | 0   | 0                 |
| ascorbic acid                                 | 0     | 0      | 0     | 0        | 0      | 0    | 0   | 0     | 0    | 0      | 0   | 0                 |
| asparagine                                    | 0     | -1     | 0     | -1       | 1      | 0    | 0   | 0     | 0    | 0      | 0   | 3                 |
| aspartate                                     | 1     | 0      | 0     | 0        | 1      | 0    | -1  | 0     | 0    | -1     | 0   | 4                 |
| BAIBA                                         | 1     | -1     | 0     | -1       | 0      | 0    | 0   | 0     | 0    | 0      | -1  | 4                 |
| benzoic acid                                  | 0     | 0      | 0     | 0        | 0      | 0    | 0   | 0     | 0    | 0      | 1   | 1                 |
| biotin                                        | 0     | -1     | 0     | 0        | 1      | 0    | 0   | 1     | 0    | -1     | 0   | 4                 |
| butyrate                                      | -1    | 1      | 1     | 0        | 0      | 0    | 0   | -1    | 0    | 0      | 0   | 4                 |
| butyryl carnitine or Isobutyryl carnitine C4  | 0     | 1      | 0     | 0        | 0      | 0    | -1  | 0     | 1    | -1     | 0   | 4                 |
| C14:0                                         | 0     | 0      | 0     | 0        | 0      | 0    | 0   | -1    | 0    | 0      | -1  | 2                 |
| C14:1                                         | -1    | 0      | 1     | 0        | 0      | 0    | 1   | 0     | 0    | 0      | 0   | 3                 |
| C14:2                                         | -1    | 1      | 1     | 1        | 1      | 0    | 0   | 0     | 0    | 0      | 0   | 5                 |
| C15:0                                         | -1    | 0      | 0     | 0        | 0      | 0    | 0   | 0     | 0    | -1     | 0   | 2                 |
| C15:1                                         | -1    | 0      | 0     | 0        | 0      | 0    | 0   | 0     | 0    | 0      | 0   | 1                 |
| C16:0                                         | -1    | 0      | 0     | 0        | 0      | 0    | 0   | -1    | 0    | 0      | 0   | 2                 |
| C16:1                                         | -1    | 0      | 0     | 0        | 0      | 0    | 0   | -1    | 0    | 0      | 0   | 2                 |
| C16:2                                         | -1    | 0      | 0     | 0        | 0      | 0    | 0   | 0     | 0    | 0      | 0   | 1                 |
| C17:0                                         | 0     | 0      | 0     | 0        | 0      | 0    | 0   | -1    | 0    | 0      | 0   | 1                 |
| C17:1                                         | -1    | 0      | 0     | 0        | 0      | 0    | 0   | -1    | 0    | 0      | 0   | 2                 |
| C17:2                                         | -1    | 0      | 1     | 0        | 0      | 1    | 0   | 0     | 0    | 0      | 0   | 3                 |
| C18:0                                         | 0     | 0      | 0     | 0        | 0      | 0    | 0   | -1    | 0    | 0      | 0   | 1                 |
| C18:1                                         | -1    | 0      | 0     | 0        | 0      | 0    | 0   | -1    | 0    | 0      | 0   | 2                 |
| C18:2                                         | -1    | 0      | 0     | 0        | 0      | 0    | 0   | -1    | 0    | 0      | 0   | 2                 |
| C18:3                                         | -1    | 0      | 0     | 0        | 0      | 0    | 0   | 0     | 0    | 0      | 0   | 1                 |
| C18:4                                         | 0     | 0      | 0     | 0        | 0      | 0    | 0   | 0     | 0    | 0      | 0   | 0                 |
| C19:0                                         | 0     | 0      | 0     | 0        | 0      | 0    | 0   | -1    | 0    | 1      | 0   | 2                 |

|                                |    |    |    |    |    |    |    |    |    |    |    |   |   |
|--------------------------------|----|----|----|----|----|----|----|----|----|----|----|---|---|
| C19:1                          | 0  | 0  | 0  | 0  | 0  | 0  | 0  | 0  | -1 | 0  | 0  | 0 | 1 |
| C19:2                          | 0  | 0  | 0  | 0  | 0  | 0  | 1  | 0  | -1 | 0  | 0  | 0 | 0 |
| C19:3                          | -1 | 0  | 0  | 0  | 0  | 0  | 0  | 0  | 0  | 0  | 0  | 0 | 0 |
| C20:0                          | 0  | 0  | 0  | 0  | 0  | 0  | 0  | 0  | 0  | 0  | 0  | 0 | 0 |
| C20:1                          | -1 | 0  | 0  | 0  | 0  | 0  | 0  | 0  | -1 | 0  | 0  | 0 | 0 |
| C20:2                          | -1 | 0  | 0  | 0  | 0  | 0  | 0  | 0  | -1 | 0  | 0  | 0 | 0 |
| C20:3                          | -1 | 0  | 0  | 0  | 0  | 0  | 0  | 0  | 0  | 0  | 0  | 0 | 0 |
| C20:4                          | 0  | 1  | 1  | 0  | 1  | 0  | 1  | 0  | 1  | 0  | 0  | 0 | 0 |
| C22:0                          | 0  | 0  | 0  | 0  | 0  | 0  | -1 | -1 | 0  | 1  | 0  | 0 | 0 |
| C22:1                          | -1 | 0  | 0  | 1  | 1  | 0  | 0  | 0  | -1 | 0  | 0  | 0 | 0 |
| C22:2                          | -1 | 0  | 0  | 0  | 1  | 0  | 0  | 0  | 0  | 0  | 0  | 0 | 0 |
| C22:3                          | -1 | 1  | 0  | 0  | 1  | 0  | 0  | 0  | 0  | 0  | 0  | 0 | 0 |
| C22:4                          | -1 | 1  | 0  | 0  | 1  | 0  | 0  | 0  | -1 | 0  | 0  | 0 | 0 |
| C22:5                          | -1 | 1  | 0  | 0  | 1  | 0  | 1  | 0  | 1  | 0  | 0  | 0 | 0 |
| C22:6                          | -1 | 1  | 0  | 1  | 1  | 0  | 0  | 0  | 0  | 0  | 0  | 0 | 0 |
| C23:0                          | 0  | 0  | 0  | 0  | 0  | 0  | 0  | 0  | 0  | 0  | 0  | 0 | 0 |
| C23:1                          | 0  | 0  | 0  | 0  | 0  | 0  | 0  | 0  | 0  | 0  | 0  | 0 | 0 |
| C24:0                          | 0  | 0  | -1 | 0  | 0  | -1 | -1 | -1 | 1  | 0  | 0  | 0 | 0 |
| C24:1                          | 0  | 0  | 0  | 0  | 1  | 0  | 0  | -1 | 0  | 0  | 0  | 0 | 0 |
| C24:2                          | 0  | 0  | 0  | 0  | 1  | 0  | 0  | 0  | 0  | 0  | 0  | 0 | 0 |
| C24:3                          | 0  | 0  | 0  | 0  | 1  | 0  | 0  | 0  | 0  | 0  | 0  | 0 | 0 |
| C24:4                          | 0  | 1  | 0  | 0  | 1  | 0  | 0  | 0  | 0  | 0  | 0  | 0 | 0 |
| C24:5                          | -1 | 1  | 0  | 0  | 1  | 1  | 0  | 0  | 0  | 0  | 0  | 0 | 0 |
| capryloyl glycine              | 1  | 0  | 0  | 1  | 0  | 0  | 0  | 0  | 0  | 0  | -1 | 0 | 0 |
| carbamoyl phosphate            | 0  | 0  | 0  | 0  | 0  | 0  | 0  | 0  | 0  | 0  | 0  | 0 | 0 |
| carnitine                      | 0  | -1 | -1 | 0  | -1 | 0  | 0  | 0  | 0  | 0  | 0  | 0 | 0 |
| carnosine                      | 1  | 0  | 0  | 0  | 0  | 0  | 0  | 0  | 0  | -1 | -1 | 0 | 0 |
| catechol sulfate               | 0  | 0  | 0  | 0  | 0  | 0  | 0  | 0  | 0  | 0  | 0  | 0 | 0 |
| cholesteryl sulfate            | -1 | 1  | 0  | 1  | 0  | 0  | 0  | 0  | 0  | 0  | 0  | 0 | 0 |
| cinnamoylglycine               | 0  | 0  | 1  | 0  | 0  | 0  | 1  | 0  | 0  | 0  | 0  | 1 | 0 |
| citramalic acid                | -1 | 0  | 1  | 1  | 0  | 1  | 1  | 0  | 0  | -1 | 0  | 0 | 0 |
| citrate                        | 0  | 0  | 0  | 1  | 0  | 1  | 1  | 0  | 0  | -1 | 0  | 0 | 0 |
| citrulline                     | 0  | 1  | 0  | 0  | -1 | 0  | -1 | 0  | 0  | -1 | 0  | 0 | 0 |
| creatine                       | 1  | -1 | 0  | 0  | 0  | 0  | -1 | 1  | 0  | 0  | 0  | 0 | 0 |
| creatinine                     | 1  | -1 | -1 | 0  | 0  | 0  | 1  | 0  | 0  | -1 | 0  | 0 | 0 |
| cresol                         | 0  | 0  | 1  | 0  | 0  | 0  | 0  | 0  | 0  | 0  | 0  | 0 | 0 |
| cresol sulfate                 | 0  | 0  | 0  | 0  | 0  | 0  | 0  | 0  | 0  | 0  | 0  | 0 | 0 |
| cystine                        | 0  | 0  | 0  | 0  | 0  | 0  | 1  | 1  | -1 | 1  | 0  | 0 | 0 |
| cytidine                       | 1  | 0  | 0  | 0  | 1  | 0  | 0  | 0  | 0  | 0  | -1 | 0 | 0 |
| D-2-Aminobutyric acid          | 0  | -1 | -1 | 0  | 0  | 0  | 0  | 0  | 0  | 0  | 0  | 0 | 0 |
| decanoyl carnitine C10         | 0  | 0  | 0  | 0  | 0  | 0  | 1  | 0  | 0  | -1 | 0  | 0 | 0 |
| decenoyl carnitine C10:1       | 0  | 0  | 1  | 1  | 0  | 0  | 0  | 0  | 0  | -1 | 0  | 0 | 0 |
| dehydroascorbic acid           | 0  | 0  | 0  | 0  | 1  | 0  | 0  | 0  | -1 | 0  | 0  | 0 | 0 |
| dehydrocarnitine               | 0  | 0  | 0  | 0  | -1 | 0  | 0  | 0  | 0  | 0  | 0  | 0 | 0 |
| deoxycholic acid               | -1 | 1  | 0  | 0  | 0  | 0  | 0  | 0  | 0  | 0  | 0  | 0 | 0 |
| deoxycytidine                  | 0  | 0  | 1  | 0  | 1  | 0  | 0  | 0  | 0  | -1 | 0  | 0 | 0 |
| deoxyinosine                   | 0  | 0  | 0  | 0  | 0  | 0  | 0  | 0  | 0  | 0  | -1 | 0 | 0 |
| deoxyuridine                   | -1 | 1  | 1  | 1  | 1  | 0  | 1  | 0  | 0  | -1 | 0  | 0 | 0 |
| D-Galactonic acid              | 0  | 0  | 1  | 1  | 1  | 0  | 0  | 0  | 0  | 0  | 0  | 0 | 0 |
| D-gluconate                    | 0  | 0  | 1  | 1  | 1  | 1  | -1 | 0  | 0  | 0  | 0  | 0 | 0 |
| diaminopimelic Acid            | 0  | 0  | 0  | 0  | 0  | 0  | 0  | 0  | 0  | 0  | 0  | 0 | 0 |
| dihydrouracil                  | 0  | 0  | 0  | 0  | 0  | 0  | 0  | -1 | 0  | 0  | 0  | 0 | 0 |
| dihydroxybenzoic acid          | 0  | 0  | 0  | 0  | -1 | 0  | 0  | 0  | 0  | -1 | -1 | 0 | 0 |
| dimethylglycine                | 1  | -1 | -1 | 0  | -1 | 0  | 0  | 0  | 0  | 0  | 0  | 0 | 0 |
| DL -3-4-Dihydroxymandelic acid | 0  | 1  | 1  | 0  | -1 | -1 | 0  | 0  | 0  | -1 | 0  | 0 | 0 |
| dodecenoyl carnitine C12:1     | 0  | 0  | 0  | 1  | 0  | 0  | 1  | -1 | 0  | -1 | 0  | 0 | 0 |
| D-Phenyllactic acid            | 0  | 0  | 0  | 0  | 0  | 0  | 0  | 0  | 0  | 0  | 0  | 0 | 0 |
| equol sulfate                  | 0  | 0  | 0  | 0  | 0  | 0  | 0  | 0  | 0  | 0  | -1 | 0 | 0 |
| formate                        | 0  | 0  | 0  | 0  | 0  | 0  | 0  | 0  | 0  | 0  | 0  | 0 | 1 |
| fumarate                       | -1 | 1  | 1  | 1  | 1  | 0  | 1  | 0  | 0  | -1 | 1  | 0 | 0 |
| galacturonic acid              | 0  | 0  | 0  | 0  | 1  | 0  | 0  | 0  | 0  | 0  | -1 | 0 | 0 |
| gamma-butyrobetaine            | 0  | -1 | -1 | 0  | 0  | 0  | 0  | 0  | 0  | 0  | 0  | 0 | 0 |
| gluconolactone                 | 0  | 0  | 0  | 0  | 0  | 1  | 0  | 0  | 0  | 0  | 0  | 0 | 0 |
| glucosamine                    | 0  | -1 | -1 | 0  | -1 | 0  | 0  | 0  | 0  | 0  | 0  | 0 | 0 |
| glucose                        | 1  | -1 | -1 | -1 | -1 | -1 | -1 | -1 | 0  | 0  | 1  | 0 | 0 |
| glutamate                      | 1  | -1 | 0  | -1 | 0  | -1 | -1 | 1  | 0  | -1 | 0  | 0 | 0 |
| glutamine                      | 0  | -1 | 0  | -1 | 0  | 0  | 1  | 0  | 1  | -1 | 0  | 0 | 0 |
| glycerate                      | 1  | 0  | 0  | 0  | 0  | 0  | 0  | 0  | -1 | -1 | 0  | 0 | 0 |
| glycerol-3-phosphate           | 1  | 0  | 0  | 1  | 1  | 0  | -1 | 0  | 0  | -1 | 0  | 0 | 0 |
| glycine                        | 0  | 0  | 0  | 0  | -1 | 0  | 0  | 0  | 0  | 0  | 0  | 0 | 0 |
| glycocholic acid               | -1 | 1  | 0  | 1  | 0  | 0  | 0  | 0  | 0  | 0  | 0  | 0 | 0 |
| glycodeoxycholic acid          | 0  | 1  | 0  | 1  | 0  | 0  | 0  | 0  | 0  | 0  | 0  | 0 | 0 |
| glycyl-L-proline               | 0  | 0  | 0  | 0  | 0  | 0  | 1  | 0  | 0  | 0  | 0  | 0 | 0 |
| glycocyanine                   | 0  | 0  | 0  | 0  | 0  | 0  | 0  | 0  | 0  | 0  | 1  | 0 | 0 |
| guanine                        | 0  | 0  | 0  | 0  | 1  | 0  | 1  | 0  | 0  | 0  | 0  | 1 | 0 |
| guanosine                      | 0  | 0  | 0  | 0  | 1  | 0  | 0  | 0  | 0  | 0  | 0  | 0 | 0 |
| hexadecenoyl carnitine C16:1   | 0  | 0  | 0  | 0  | 0  | 0  | 1  | 0  | 0  | -1 | 0  | 0 | 0 |
| hexanoyl carnitine C6          | 0  | -1 | 0  | 0  | 0  | 0  | 0  | 0  | 0  | -1 | 0  | 0 | 0 |
| hippuric acid                  | 0  | 0  | 0  | 0  | 0  | 0  | 0  | 0  | 0  | 0  | 0  | 0 | 0 |
| homoarginine                   | 0  | -1 | 0  | 0  | 0  | 0  | 0  | 0  | 0  | 0  | 0  | 0 | 0 |
| homocarnosine                  | 0  | 0  | 0  | 0  | 0  | 0  | 0  | 0  | 0  | 0  | -1 | 0 | 0 |
| homocitrulline                 | 0  | 0  | 0  | 0  | 0  | 0  | 0  | 0  | 0  | 0  | 0  | 0 | 0 |
| homocysteic acid               | 0  | 0  | 0  | 0  | 0  | 0  | 0  | 0  | 0  | -1 | 0  | 0 | 0 |
| homocysteine                   | 1  | -1 | -1 | 0  | 0  | 0  | 0  | 0  | 0  | 0  | 0  | 0 | 0 |
| homogentisic acid              | 1  | 0  | 0  | 0  | 0  | 0  | 1  | 0  | 0  | 0  | 0  | 0 | 0 |
| hydroquinone                   | 0  | 0  | 0  | -1 | -1 | 0  | 0  | 0  | 0  | -1 | -1 | 0 | 0 |
| hydroxyindoleacetic acid       | 0  | 0  | 1  | 0  | 0  | 0  | 0  | -1 | 0  | -1 | 0  | 0 | 0 |
| hydroxyphenyllactic acid       | 0  | 0  | 0  | 0  | 0  | 1  | 0  | 0  | 0  | 0  | 0  | 0 | 0 |
| hydroxyphenylpyruvate          | 0  | 0  | 0  | 0  | 0  | 0  | 0  | 0  | 0  | -1 | 0  | 0 | 0 |
| hydroxyproline                 | 0  | -1 | 0  | 0  | 0  | 0  | 0  | 0  | 0  | -1 | 0  | 0 | 0 |

1  
2  
1  
0  
2  
2  
1  
4  
3  
4  
2  
3  
4  
4  
0  
0  
5  
2  
1  
1  
2  
4  
3  
0  
3  
6  
4  
4  
0  
0  
1  
4  
3  
2  
3  
1  
7  
5  
0  
1  
0  
1  
2  
2  
1  
3  
8  
2  
7  
5  
3  
5  
1  
3  
4  
1  
2  
1  
3  
4  
1  
2  
1  
3  
4  
1  
2  
1  
2  
3  
4  
1  
2  
1



|                                                   |       |        |       |          |        |      |     |       |      |        |     |   |
|---------------------------------------------------|-------|--------|-------|----------|--------|------|-----|-------|------|--------|-----|---|
| tetradecadienoyl carnitine C14:2                  | -1    | 1      | 1     | 1        | 1      | 0    | 1   | -1    | 0    | -1     | 0   | 8 |
| tetradecenoyl carnitine C14:1                     | 0     | 1      | 1     | 1        | 0      | 1    | 1   | -1    | 0    | -1     | 0   | 7 |
| threonine                                         | 1     | -1     | 0     | -1       | 0      | 0    | 0   | 0     | 0    | 0      | 0   | 3 |
| thymidine                                         | -1    | 1      | 1     | 1        | 1      | 0    | 0   | 0     | 0    | -1     | 0   | 6 |
| thymine                                           | -1    | 1      | 1     | 1        | 1      | 1    | 0   | 0     | 0    | -1     | 0   | 7 |
| tiglyl carnitine or methylcrotonyl carnitine C5:1 | 0     | 0      | 0     | 0        | 0      | 0    | -1  | 0     | 0    | 0      | 0   | 1 |
| trans-Cinnamate                                   | 0     | 0      | 0     | -1       | 0      | 0    | 0   | 1     | 0    | 0      | 0   | 2 |
| trans-Hydroxycinnamic acid                        | 0     | 0      | 0     | 0        | 0      | 0    | 0   | 0     | 0    | 0      | 0   | 0 |
| triethanolamine                                   | 1     | 0      | 0     | 0        | 0      | 0    | -1  | 0     | 0    | -1     | 0   | 3 |
| tryptophan                                        | 1     | -1     | -1    | -1       | 0      | 0    | 0   | 0     | 0    | 0      | 0   | 4 |
| tyramine                                          | 0     | 0      | -1    | 0        | 0      | 0    | 0   | 0     | 0    | 0      | 0   | 1 |
| tyrosine                                          | 0     | -1     | 0     | 0        | 0      | 0    | 0   | 0     | 0    | 1      | 0   | 2 |
| uracil                                            | 0     | 0      | 0     | 0        | 0      | 0    | 1   | 0     | 0    | -1     | 0   | 2 |
| ureidopropionic acid                              | -1    | 0      | 0     | 0        | 0      | 0    | 0   | 0     | 0    | -1     | 0   | 2 |
| uric acid                                         | 0     | 0      | 0     | 0        | -1     | 1    | 0   | 0     | 0    | -1     | 1   | 4 |
| uridine                                           | 0     | 0      | 0     | 1        | 1      | 0    | 1   | 0     | 0    | -1     | 0   | 4 |
| valine                                            | 1     | -1     | -1    | -1       | 0      | 0    | -1  | 0     | 0    | 0      | 0   | 5 |
| xanthine                                          | -1    | 1      | 0     | 1        | 0      | 0    | 0   | 0     | 0    | 0      | 0   | 3 |
| xanthosine                                        | 0     | 1      | 0     | 1        | 1      | 1    | 1   | 1     | -1   | -1     | 0   | 8 |
|                                                   | liver | portal | colon | pancreas | spleen | head | leg | heart | lung | kidney | ear |   |

Total cases of organ-specific uptake or release

739

# Data File 2. Heat map from Fig.1G with metabolite names. Related to Figure 1.

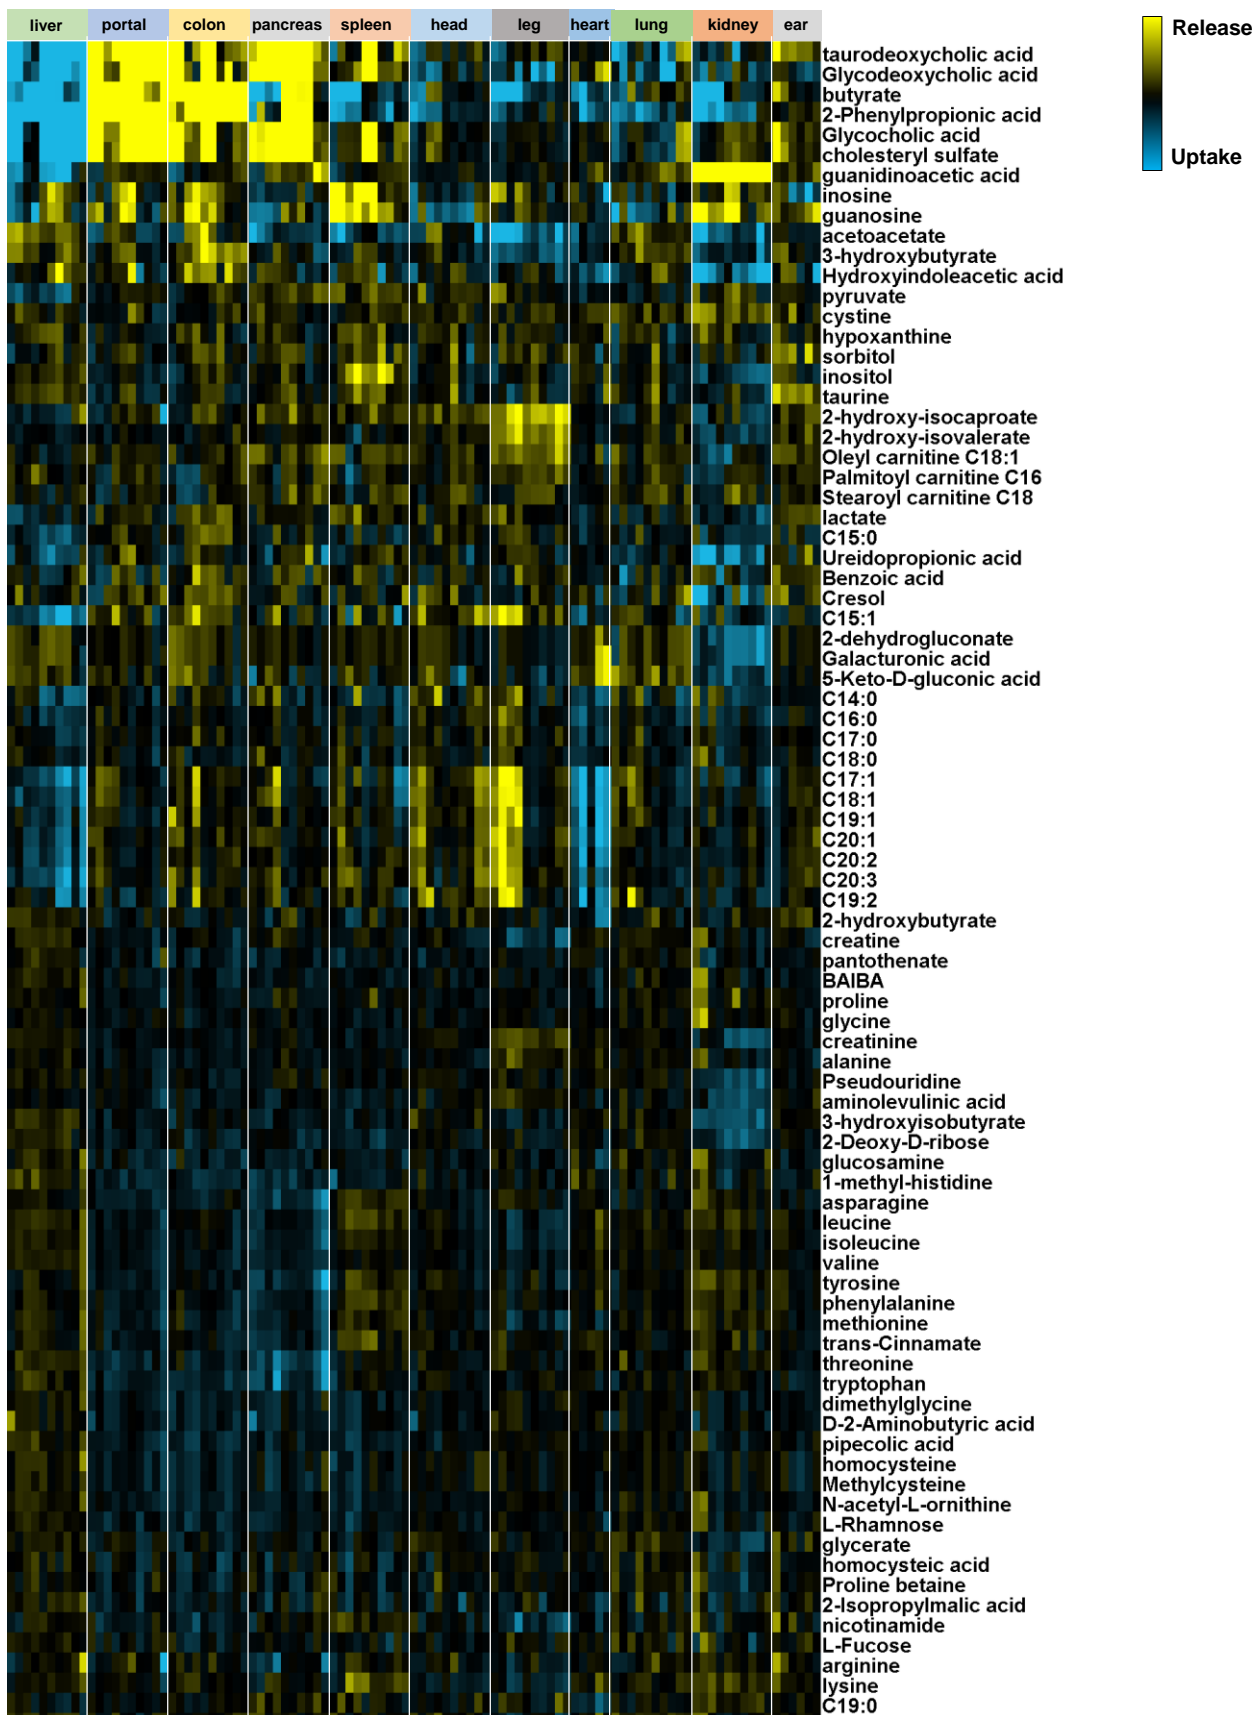

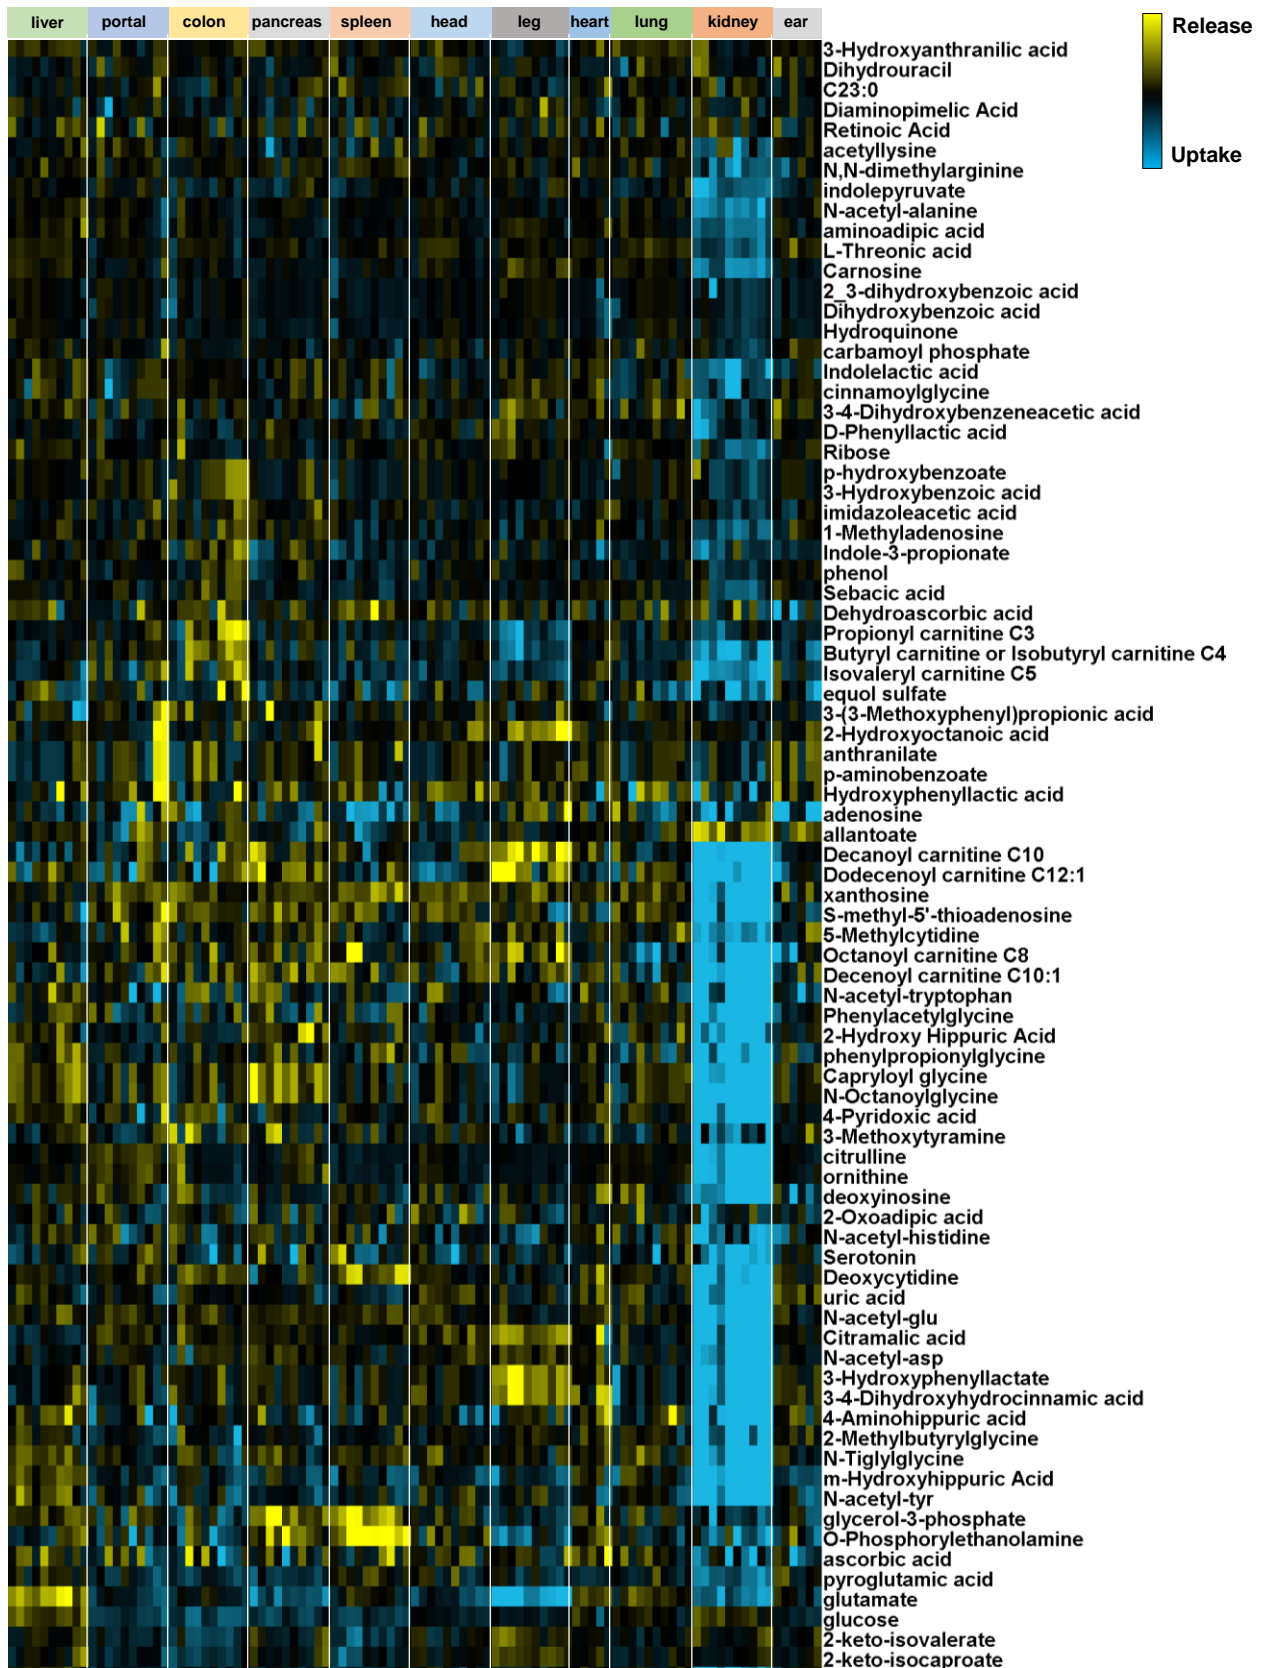

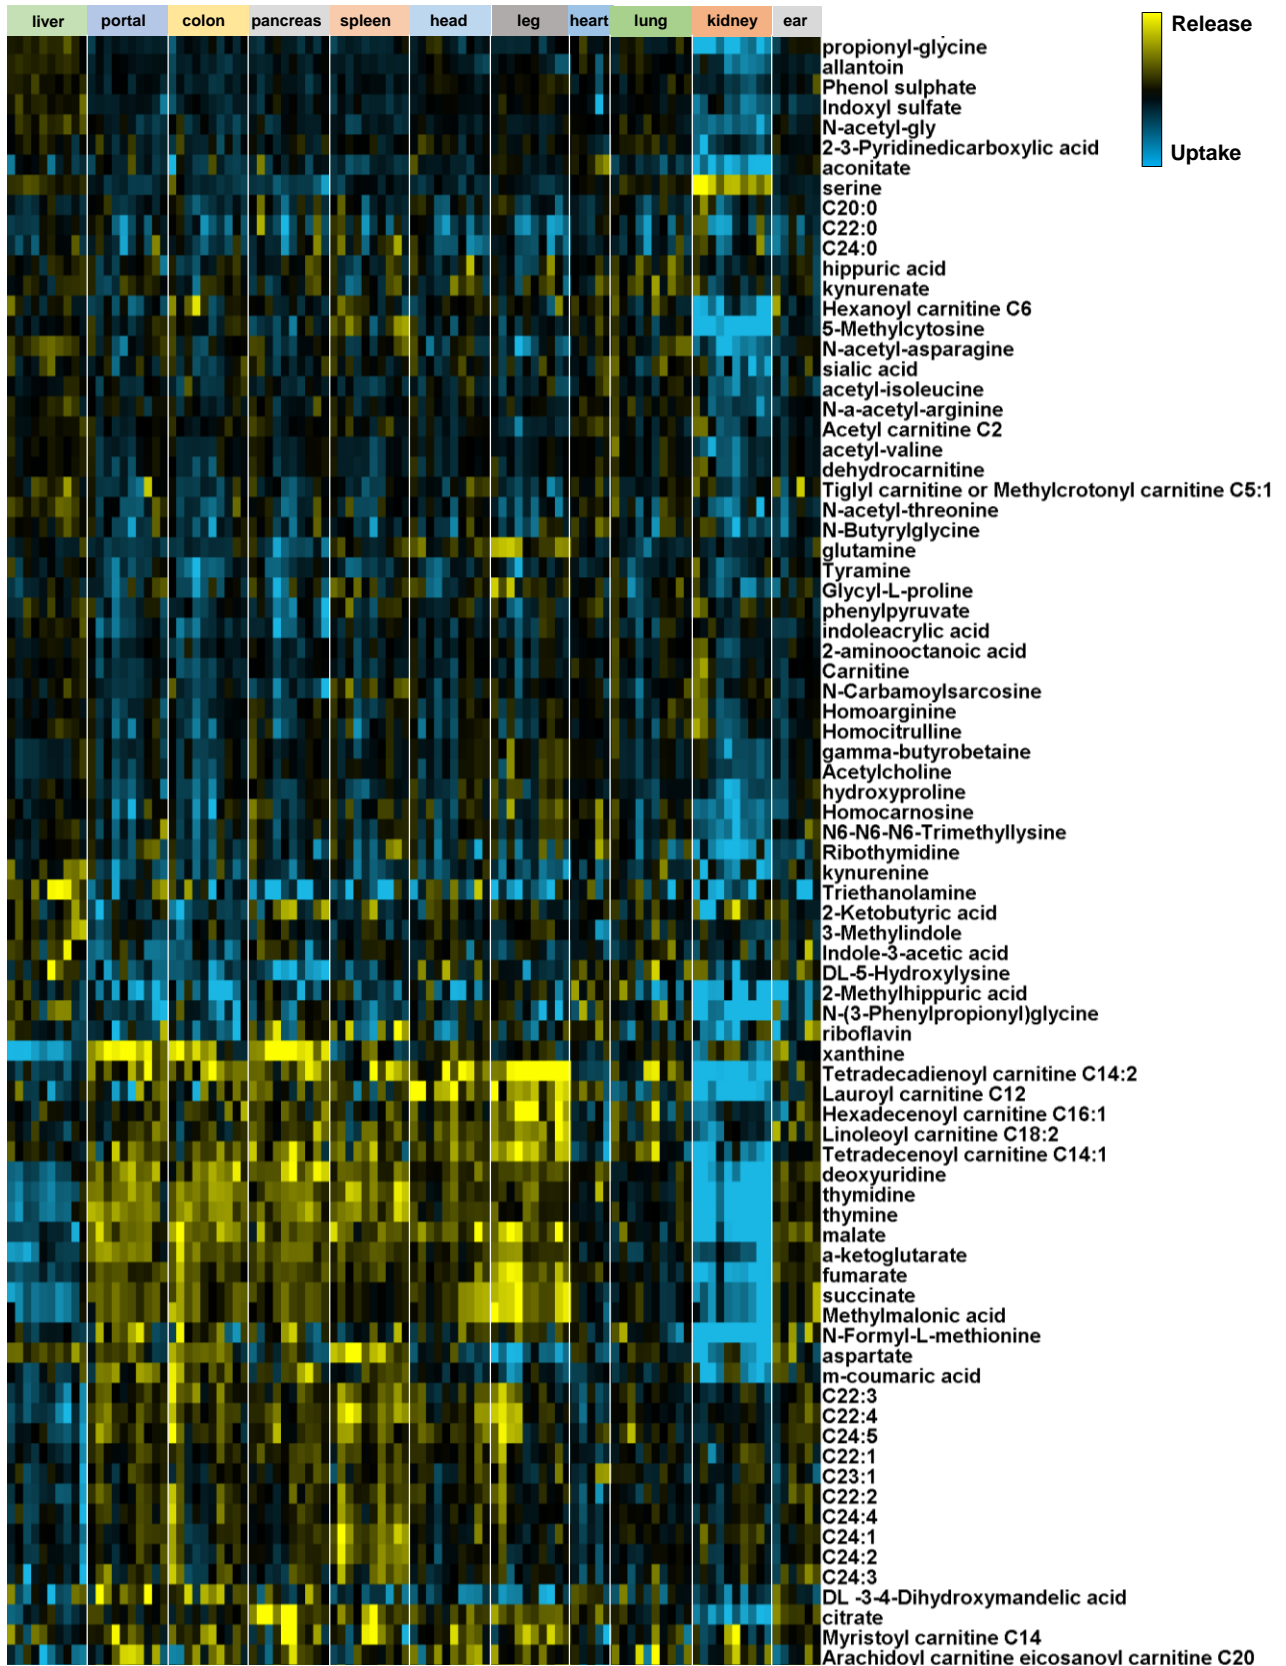







|                               |          |          |          |          |          |          |          |           |          |          |          |           |          |          |          |           |          |          |          |          |
|-------------------------------|----------|----------|----------|----------|----------|----------|----------|-----------|----------|----------|----------|-----------|----------|----------|----------|-----------|----------|----------|----------|----------|
| creatine                      | 1.081116 | 1.093078 | 1.058754 | 1.061046 | 1.062318 | 1.038726 | 1.028028 | 1.093973  | 1.050844 | 0.946559 | 0.910757 | 0.951146  | 0.872645 | 0.965422 | 0.997813 | 0.99935   | 0.924632 | 0.943356 | 0.965191 | 0.981424 |
| creatine                      | 0.991165 | 1.438627 | 0.939546 | 1.131053 | 0.916892 | 0.969009 | 0.991897 | 1.027092  | 1.218482 | 0.933355 | 0.771553 | 0.758107  | 1.217896 | 1.184317 | 1.025489 | 1.187286  | 1.295787 | 1.009396 | 1.13969  | 1.336263 |
| creol                         | 1.036315 | 1.107536 | 0.970739 | 1.138517 | 1.074916 | 0.986929 | 0.891572 | 0.890828  | 1.229085 | 0.880128 | 0.910828 | 1.025112  | 1.123968 | 1.001725 | 1.031425 | 1.076777  | 1.046665 | 0.966912 | 1.045668 | 0.974568 |
| cresol sulfat                 | 1.036955 | 1.309202 | 1.133908 | 1.117064 | 1.02634  | 0.921836 | 1.204248 | 1.071125  | 1.048418 | 0.880932 | 0.96802  | 0.980815  | 0.959031 | 0.972398 | 0.931975 | 1.076006  | 1.201047 | 1.003052 | 0.802342 | 0.824521 |
| cytine                        | 1.055378 | 1.159842 | 1.220081 | 1.09829  | 1.123922 | 1.280873 | 1.246678 | 1.210126  | 1.038311 | 1.424223 | 0.779122 | 0.838305  | 1.083815 | 1.053054 | 0.939685 | 1.147616  | 1.050691 | 0.808645 | 0.666282 | 0.651485 |
| cytidine                      | 1.523603 | 1.074713 | 1.070616 | 1.085862 | 0.928036 | 1.100252 | 0.966451 | 1.09252   | 1.0144   | 0.98364  | 0.748022 | 0.926253  | 0.858474 | 0.866146 | 0.920545 | 1.005591  | 0.992661 | 0.919835 | 0.945736 | 0.847237 |
| D-2-Aminobutyric acid         | 0.921411 | 0.599404 | 0.878399 | 0.741161 | 1.003688 | 0.788335 | 1.037142 | 0.68737   | 1.062532 | 1.138933 | 0.979498 | 0.779188  | 1.170223 | 0.790379 | 0.850044 | 1.007707  | 1.443105 | 1.331506 | 1.111754 | 0.773749 |
| decanoyl carnitine C10        | 1.104282 | 0.743705 | 1.003102 | 0.826158 | 0.873575 | 0.940806 | 0.516388 | 0.799132  | 0.807228 | 0.561149 | 1.115822 | 0.984782  | 1.272633 | 1.047567 | 1.074291 | 0.867694  | 0.751437 | 1.356772 | 1.230204 | 1.846354 |
| decanoyl carnitine C10:1      | 1.169838 | 1.12734  | 1.153752 | 1.191842 | 1.126015 | 1.499747 | 0.666213 | 0.956158  | 1.045722 | 0.958166 | 0.931046 | 0.935606  | 0.950156 | 0.828747 | 1.059254 | 0.768893  | 1.673857 | 1.081154 | 1.033711 | 0.992872 |
| dehydroascorbic acid          | 1.060554 | 0.919108 | 1.015811 | 0.995301 | 0.922226 | 1.067239 | 1.040321 | 0.992168  | 1.048501 | 1.029023 | 1.085185 | 0.792056  | 0.897862 | 0.743721 | 0.913514 | 0.729592  | 0.959949 | 1.012324 | 1.059877 | 0.986269 |
| deoxyribose                   | 0.232702 | 0.171778 | 0.845995 | 0.878159 | 0.088443 | 0.066849 | 0.040781 | 0.040421  | 0.05051  | 0.038941 | 1.416328 | 0.7440284 | 1.287052 | 1.581013 | 1.301354 | 1.477366  | 1.288008 | 1.218777 | 38.28188 | 33.13968 |
| deoxyribose                   | 1.010263 | 1.114712 | 1.070719 | 1.051191 | 1.124813 | 1.061229 | 0.851363 | 0.920754  | 0.86961  | 1.017488 | 0.930019 | 1.069981  | 1.00093  | 1.006732 | 0.993621 | 1.026255  | 1.35512  | 1.027087 | 1.11471  | 0.951604 |
| deoxyvitidine                 | 1.047045 | 1.088529 | 0.825967 | 1.230278 | 1.058988 | 0.970698 | 1.121862 | 1.056433  | 1.149122 | 1.06986  | 1.342108 | 1.146765  | 0.948216 | 1.104714 | 1.137146 | 1.224889  | 1.028999 | 0.972885 | 0.965359 |          |
| deoxyyosidine                 | 0.68414  | 0.660791 | 0.802295 | 0.781925 | 0.681422 | 0.633754 | 0.775389 | 0.782505  | 1.030011 | 0.982911 | 1.223491 | 1.428746  | 1.083599 | 1.31776  | 1.526619 | 1.690346  | 1.293272 | 1.30213  | 1.660099 | 1.005257 |
| deoxyvitidine                 | 0.92679  | 1.292882 | 1.184519 | 1.146521 | 1.149013 | 0.995675 | 0.978152 | 0.986086  | 0.85386  | 0.931974 | 1.159343 | 1.641122  | 1.149735 | 1.022126 | 0.915888 | 1.020382  | 1.26771  | 1.191565 | 1.122495 | 1.041866 |
| D-Galactonic acid             | 0.92679  | 1.292882 | 1.184519 | 0.993485 | 1.363704 | 0.95675  | 0.978152 | 0.986086  | 0.659947 | 0.903509 | 1.159343 | 1.641122  | 1.149735 | 1.022126 | 0.9613   | 1.020382  | 1.26771  | 1.191565 | 1.122495 | 1.041866 |
| D-glucamate                   | 1.189086 | 1.13985  | 0.973233 | 1.06757  | 0.973148 | 0.940259 | 0.961955 | 1.066534  | 0.727131 | 1.103339 | 0.987826 | 0.820623  | 0.506523 | 0.98257  | 0.912482 | 1.01779   | 1.046603 | 0.942325 | 1.121257 | 0.889698 |
| di-aminopropionic Acid        | 0.874296 | 0.924063 | 0.917384 | 1.019124 | 0.850062 | 0.928657 | 1.06477  | 0.931508  | 1.142137 | 0.98419  | 0.849525 | 1.253032  | 0.808842 | 1.127214 | 1.018148 | 1.041727  | 0.961382 | 0.952183 | 1.215012 | 1.25384  |
| dihydroxalac                  | 0.983063 | 1.073763 | 1.017051 | 1.063945 | 1.010894 | 1.015016 | 0.966585 | 0.944706  | 1.004416 | 1.005309 | 0.770282 | 1.090456  | 1.054855 | 0.960481 | 1.050254 | 0.96975   | 1.051053 | 1.016629 | 0.888112 | 0.867696 |
| dihydroxybenzoic acid         | 1.015986 | 1.074713 | 1.070616 | 1.085862 | 0.928036 | 1.100252 | 1.022805 | 1.09252   | 0.989257 | 1.283946 | 0.983181 | 0.922653  | 0.858474 | 0.866146 | 0.920545 | 1.005591  | 0.950854 | 0.919835 | 0.811258 | 1.001504 |
| dimethylglycine               | 1.459666 | 0.766367 | 0.623491 | 1.045531 | 0.960907 | 0.934864 | 0.760355 | 0.72633   | 1.371583 | 1.284594 | 0.81711  | 2.231203  | 1.415393 | 1.042371 | 1.399521 | 1.221561  | 1.22692  | 3.209149 | 0.980284 | 1.019159 |
| DL-3,4-Dihydroxymandelic acid | 0.829484 | 1.099347 | 0.823045 | 1.088501 | 1.01696  | 1.398025 | 1.320073 | 1.130985  | 1.133163 | 0.849501 | 0.682777 | 0.777062  | 0.544866 | 0.777311 | 1.203704 | 0.698099  | 0.773111 | 0.907424 | 0.666053 | 0.672858 |
| dodecanoyl carnitine C12:1    | 1.344845 | 0.749472 | 0.610861 | 1.176607 | 1.104795 | 1.568822 | 1.185281 | 0.959122  | 1.227052 | 1.155389 | 0.692929 | 0.657597  | 1.178064 | 0.667717 | 0.948396 | 0.941122  | 1.432274 | 1.226493 | 1.043436 | 0.960889 |
| D-Phenyllactic acid           | 1.024026 | 1.057082 | 0.916035 | 0.918553 | 0.967215 | 1.024285 | 0.974771 | 0.962563  | 0.8839   | 0.898968 | 1.031179 | 1.128687  | 0.779803 | 0.917055 | 1.021353 | 0.842498  | 0.973354 | 0.811331 | 0.955628 | 0.970454 |
| equol sulfat                  | 0.810098 | 1.004045 | 1.179639 | 1.246585 | 1.486398 | 1.216352 | 0.739829 | 0.786717  | 0.736739 | 0.631667 | 1.118548 | 0.866686  | 1.062541 | 1.077413 | 0.899306 | 0.867154  | 1.379909 | 0.752501 | 1.016509 | 0.838951 |
| formate                       | 0.999223 | 1.228587 | 1.469169 | 0.657471 | 1.453973 | 1.098854 | 1.163927 | not measu | 0.356753 | 0.836246 | 0.719467 | 0.824162  | 1.456999 | 1.091760 | 0.742262 | not measu | 0.756204 | 0.762105 | 0.708629 |          |
| galactaric acid               | 0.770605 | 0.703891 | 0.762104 | 0.769032 | 0.902909 | 0.7376   | 0.839819 | 0.798804  | 0.882095 | 0.980046 | 1.112013 | 1.301501  | 1.224103 | 1.258704 | 1.267617 | 1.072401  | 1.086569 | 1.073055 | 1.203932 | 1.189392 |
| galactaric acid               | 1.240141 | 1.168601 | 1.094393 | 1.09248  | 1.259082 | 1.316626 | 1.241241 | 1.02558   | 0.77112  | 1.005283 | 1.008149 | 1.05444   | 1.126258 | 1.00444  | 1.060688 | 1.072973  | 0.958844 | 1.112837 | 1.269274 | 1.269274 |
| gamma-butyrolactone           | 0.96315  | 0.789379 | 0.832646 | 0.835876 | 0.885374 | 0.910845 | 0.914857 | 0.862377  | 1.04882  | 1.169169 | 1.109426 | 0.782756  | 1.104097 | 0.810862 | 0.86929  | 0.900424  | 0.856787 | 1.016211 | 1.07142  | 0.762214 |
| gluconolactone                | 0.94344  | 1.161285 | 0.813998 | 1.264456 | 1.063997 | 1.214509 | 0.98447  | 0.745747  | 0.827838 | 0.702644 | 1.54599  | 1.004729  | 0.565148 | 0.83376  | 0.336126 | 0.98223   | 1.099798 | 1.5018   | 1.081744 | 0.980874 |
| glucosamine                   | 0.943052 | 1.065156 | 1.157331 | 1.177334 | 1.052965 | 1.008992 | 1.044666 | 1.118937  | 0.978555 | 1.406991 | 0.863054 | 1.030191  | 0.835481 | 1.010628 | 1.04412  | 0.875256  | 0.831194 | 0.915023 | 0.822558 | 0.833332 |
| glucose                       | 1.242634 | 1.047865 | 1.216406 | 1.139124 | 1.100794 | 1.094179 | 1.044666 | 1.118937  | 1.406991 | 0.791564 | 0.79552  | 0.821694  | 0.841648 | 0.909839 | 0.887281 | 0.793354  | 0.780454 | 0.811331 | 0.655628 | 0.626467 |
| glutamate                     | 1.468929 | 1.67011  | 1.418307 | 1.294762 | 1.629978 | 1.680085 | 1.934547 | 2.135593  | 1.143978 | 1.507503 | 0.746428 | 0.926438  | 1.021533 | 0.931089 | 0.920902 | 0.932141  | 0.821818 | 0.801603 | 0.706217 | 0.682609 |
| glutamine                     | 0.854018 | 0.908035 | 0.572066 | 0.942938 | 1.015411 | 0.918814 | 0.860867 | 0.890039  | 0.896328 | 1.206208 | 0.858989 | 0.899114  | 0.775961 | 0.829701 | 0.872167 | 0.805684  | 0.821591 | 0.868158 | 0.706267 |          |
| glycerat                      | 1.063163 | 0.964981 | 1.094414 | 1.065943 | 1.081102 | 1.084116 | 1.028495 | 1.136515  | 0.99986  | 1.106335 | 0.865457 | 0.903144  | 1.033971 | 1.098481 | 1.047574 | 1.010406  | 0.827051 | 0.805665 | 1.063161 | 1.067161 |
| glycerol-3-phosphate          | 1.145502 | 1.094486 | 1.093    | 1.038083 | 1.324684 | 1.017666 | 1.068262 | 1.290211  | 1.334393 | 1.225933 | 1.131578 | 0.734352  | 1.238897 | 1.022613 | 0.680048 | 1.040816  | 1.117604 | 1.185331 | 0.973735 | 0.953327 |
| glycine                       | 0.95945  | 1.00502  | 1.069177 | 1.035407 | 1.069314 | 1.038844 | 0.956722 | 1.054841  | 0.990172 | 0.999832 | 0.925866 | 0.983983  | 0.96225  | 0.901781 | 0.941468 | 0.932168  | 0.971608 | 1.058163 | 1.030377 | 1.039377 |
| glycolcholic acid             | 0.287934 | 0.289418 | 0.868689 | 0.994236 | 1.371625 | 0.991832 | 0.961503 | 0.963021  | 0.065737 | 0.062387 | 0.451025 | 0.200354  | 1.408422 | 1.407327 | 26.64495 | 36.5248   | 14.22206 | 12.11387 | 19.49059 | 19.09827 |
| glycodeoxycholic acid         | 0.217357 | 0.751285 | 0.845995 | 0.711874 | 0.088443 | 0.036124 | 0.008972 | 0.010354  | 0.584136 | 0.479043 | 1.230934 | 1.280929  | 1.287052 | 1.179563 | 1.301354 | 35.06563  | 75.71422 | 89.59333 | 2.1093   | 2.81439  |
| glycyl-L-proline              | 0.818975 | 0.559142 | 0.869898 | 0.789437 | 0.842993 | 1.124213 | 1.034091 | 0.900463  | 1.076512 | 0.837995 | 0.802329 | 0.897554  | 0.608189 | 0.792974 | 1.071765 | 0.967954  | 1.028248 | 1.20849  | 1.24968  | 1.296668 |
| glycyamine                    | 0.593144 | 0.559142 | 0.878798 | 1.013337 | 0.848168 | 0.931017 | 0.301252 | 0.112708  | 0.83398  | 1.129411 | 0.813337 | 0.797091  | 1.152164 | 1.219227 | 1.10885  | 1.114492  | 1.083838 | 1.04857  | 1.083189 | 1.04857  |
| guanidine                     | 0.801756 | 0.97099  | 0.831396 | 0.935975 | 0.932134 | 0.766361 | 0.934018 | 0.661236  | 1.09138  | 1.42447  | 0.909096 | 1.07755   | 1.086963 | 1.04447  | 1.197185 | 1.433055  | 1.02885  | 0.958783 | 0.813902 | 1.34548  |
| guanosine                     | 0.609812 | 0.715447 | 0.902237 | 0.509015 | 1.273567 | 1.635367 | 1.53936  | 1.152649  | 0.780299 | 0.872969 | 1.395761 | 1.675159  | 0.893365 | 1.249967 | 0.291737 | 1.87007   | 0.845126 | 0.959048 | 0.695332 | 1.27888  |
| hexadecanoyl carnitine C16:1  | 0.945067 | 1.00789  | 0.933617 | 0.788277 | 1.246337 | 1.044588 | 0.939058 | 0.920255  | 0.984391 | 0.894693 | 1.106111 | 0.928638  | 0.889132 | 1.132723 | 0.970967 | 1.043498  | 0.97017  | 1.22565  | 1.061885 | 1.348702 |
| hexanoyl carnitine C6         | 1.396449 | 1.085022 | 0.875432 | 1.032005 | 0.832168 | 1.059959 | 1.042702 | 1.171883  | 0.995604 | 0.912177 | 0.805219 | 1.01802   | 0.731118 | 0.562493 | 0.664923 | 0.725522  | 0.927118 | 0.98688  | 0.714686 |          |
| hippuric acid                 | 1.063429 | 0.898645 | 0.941341 | 1.053662 | 0.8169   | 1.13605  | 1.09965  |           |          |          |          |           |          |          |          |           |          |          |          |          |

|                                                 |          |          |          |          |          |            |          |          |           |           |          |          |          |          |          |          |          |          |           |          |
|-------------------------------------------------|----------|----------|----------|----------|----------|------------|----------|----------|-----------|-----------|----------|----------|----------|----------|----------|----------|----------|----------|-----------|----------|
| phenylacetylglutamine                           | 0.798631 | 0.856007 | 1.118517 | 0.953367 | 0.94912  | 1.199361   | 1.300507 | 1.336351 | 1.517993  | 1.092491  | 1.367389 | 0.983452 | 1.308847 | 0.642233 | 0.790198 | 0.853321 | 0.770538 | 0.973667 | 1.319063  | 1.126822 |
| phenylalanine                                   | 0.925201 | 0.939498 | 1.131187 | 1.124226 | 1.087084 | 1.001249   | 0.968484 | 1.010705 | 0.986131  | 1.248853  | 0.929794 | 1.062182 | 0.888216 | 0.876299 | 0.952635 | 0.943753 | 0.974651 | 0.927032 | 0.974250  | 0.751158 |
| phenylpropionylglycine                          | 1.321796 | 1.331190 | 1.079772 | 1.040122 | 1.002905 | 1.032621   | 1.502954 | 1.225694 | 1.160718  | 1.206889  | 0.927844 | 0.882384 | 1.164569 | 1.13928  | 0.943138 | 0.864573 | 0.876261 | 1.005833 | 0.913802  | 1.02167  |
| phenylpyruvate                                  | 0.840668 | 0.838475 | 1.235155 | 1.09544  | 0.94304  | 1.201083   | 0.97337  | 0.920277 | 1.26251   | 1.234812  | 1.162871 | 0.782816 | 0.950113 | 0.64345  | 0.805791 | 0.804254 | 0.905678 | 1.082357 | 1.078821  | 0.736389 |
| p-hydroxybenzoate                               | 0.962779 | 1.118470 | 0.976024 | 1.0293   | 1.047612 | 1.016341   | 1.001033 | 0.968242 | 0.967615  | 1.260804  | 0.960813 | 1.132402 | 1.171192 | 0.925242 | 1.106027 | 0.988216 | 1.095184 | 1.177248 | 0.934766  | 0.848969 |
| pipicolic acid                                  | 1.137815 | 1.119757 | 1.106942 | 1.226954 | 1.028883 | 1.029511   | 0.958945 | 1.05552  | 0.984748  | 1.221661  | 0.932828 | 0.930518 | 0.907792 | 0.886813 | 0.942121 | 0.966557 | 0.953399 | 0.866957 | 0.840879  | 0.741381 |
| proline                                         | 1.044688 | 1.067662 | 1.008777 | 1.080826 | 1.0242   | 1.030885   | 1.066262 | 0.990322 | 0.995015  | 1.024628  | 0.924631 | 0.992954 | 0.919397 | 0.918839 | 1.002718 | 0.996574 | 0.936235 | 0.939239 | 0.938012  | 0.766127 |
| proline betaine                                 | 1.045202 | 0.915719 | 1.086513 | 1.185602 | 0.932449 | 1.020034   | 1.061986 | 1.016181 | 0.987541  | 1.00444   | 0.904611 | 0.818155 | 1.005362 | 1.011222 | 1.034984 | 0.780614 | 0.944738 | 1.168688 | 1.02897   | 1.142083 |
| propionate                                      | 1.024091 | 1.071586 | 1.001379 | 0.052556 | 0.028439 | 0.103953   | 0.223756 | 0.297302 | not measu | not measu | 75.32203 | 15.68159 | 14.50019 | 0.044886 | 1.012258 | 52.30396 | 0.947331 | 0.773719 | not measu | 7.495372 |
| propionyl carnitin C3                           | 1.00102  | 0.896767 | 0.968496 | 0.9806   | 0.9294   | 0.901971   | 1.038931 | 0.940131 | 0.971366  | 0.972945  | 1.060294 | 0.848207 | 1.068506 | 0.880233 | 0.90226  | 0.946343 | 1.006395 | 1.167639 | 1.28244   | 1.057295 |
| propionyl carnitin C4                           | 1.074655 | 1.064133 | 1.121224 | 1.070746 | 1.168384 | 1.111827   | 1.11772  | 1.289137 | 1.101208  | 1.000163  | 0.7888   | 0.968364 | 0.876991 | 0.930777 | 0.879272 | 0.921313 | 0.892991 | 1.080834 | 0.890876  | 0.877738 |
| psuedouridine                                   | 1.048173 | 1.102477 | 1.007586 | 1.026694 | 1.083569 | 0.986316   | 1.052973 | 1.092893 | 0.950465  | 1.095032  | 0.91902  | 0.983387 | 1.048553 | 0.941523 | 1.040941 | 0.951237 | 0.954552 | 1.01445  | 0.855497  | 0.825476 |
| pyroglutamic acid                               | 1.016999 | 1.15991  | 0.830367 | 1.01901  | 1.266156 | 1.062046   | 1.09703  | 1.102515 | 0.901726  | 1.096854  | 0.851006 | 1.010699 | 0.778702 | 0.79123  | 1.108761 | 0.915135 | 0.886755 | 0.8178   | 0.673791  | 0.747409 |
| pyruvate                                        | 0.754709 | 0.667473 | 0.853104 | 0.920528 | 0.762352 | 0.81223    | 0.666684 | 0.628203 | 1.103738  | 1.017457  | 0.876932 | 0.971788 | 0.923742 | 1.007845 | 1.018195 | 0.974187 | 1.082182 | 1.044785 | 1.090216  | 1.040848 |
| retinoic Acid                                   | 1.373457 | 0.915879 | 1.007233 | 0.873515 | 0.958783 | 0.938535   | 1.35937  | 1.146683 | 0.917392  | 1.103093  | 0.688787 | 1.775172 | 0.8231   | 0.948903 | 0.999416 | 0.816892 | 1.408844 | 0.775916 | 0.995876  | 1.021224 |
| riboflavin                                      | 1.303676 | 1.08068  | 1.088425 | 0.903271 | 0.921616 | 0.96505    | 0.815363 | 1.05019  | 0.762625  | 0.789285  | 0.840623 | 0.861414 | 0.977811 | 0.490725 | 0.745559 | 1.091585 | 0.826111 | 0.819511 | 0.757449  | 1.650792 |
| ribose                                          | 1.096792 | 1.178058 | 0.921716 | 1.073907 | 1.044249 | 1.069831   | 1.101967 | 1.12646  | 0.980907  | 0.977688  | 0.911225 | 1.244441 | 0.98811  | 1.000245 | 0.9998   | 0.999897 | 0.92364  | 1.094778 | 1.021596  | 1.128    |
| ribosylmidine                                   | 0.963254 | 0.841389 | 0.934692 | 0.855053 | 0.989442 | 0.9929     | 1.020437 | 1.021121 | 0.912919  | 0.937583  | 1.081221 | 0.916267 | 1.022025 | 0.738832 | 0.895965 | 0.717141 | 1.149615 | 1.304705 | 1.342722  | 0.762284 |
| serbacic acid                                   | 1.04066  | 1.037517 | 1.039876 | 1.073737 | 0.933253 | 0.893996   | 0.965987 | 1.026643 | 0.977865  | 1.053768  | 0.955946 | 1.009984 | 0.996422 | 1.131078 | 1.143139 | 1.006141 | 0.792972 | 0.877625 | 0.968168  | 1.080168 |
| serine                                          | 1.138955 | 1.155105 | 1.26089  | 1.23386  | 1.139984 | 0.959591   | 1.041772 | 1.093029 | 1.066621  | 1.130462  | 0.916286 | 0.946916 | 0.80461  | 0.857519 | 0.960876 | 0.796019 | 0.797852 | 0.786993 | 0.863185  | 0.931693 |
| serotonin                                       | 0.709529 | 0.770301 | 0.955614 | 0.76538  | 1.076223 | 0.914074   | 0.980274 | 0.877936 | 1.239124  | 1.386943  | 0.975376 | 1.128973 | 1.188468 | 0.861131 | 0.857419 | 0.944134 | 1.205251 | 1.42832  | 1.186576  | 0.930227 |
| silicic acid                                    | 1.236303 | 0.857098 | 0.976746 | 0.923893 | 1.192232 | 1.35021    | 0.954635 | 0.985511 | 1.067479  | 0.93658   | 0.896611 | 0.979413 | 1.106153 | 0.657744 | 0.937073 | 0.994194 | 1.16731  | 0.975828 | 0.83384   | 1.129458 |
| S-methyl-S-thioadenosine                        | 1.050084 | 0.881566 | 0.984851 | 1.200619 | 1.009891 | 0.910162   | 0.965235 | 1.226059 | 0.803822  | 0.339841  | 1.274386 | 1.006919 | 1.06063  | 1.698513 | 1.268086 | 1.053985 | 0.995301 | 1.002055 | 1.323721  | 2.58514  |
| sorbitol                                        | 0.742298 | 0.686089 | 0.969359 | 0.891689 | 0.999428 | 1.128657   | 1.286424 | 0.898275 | 1.090203  | 1.132912  | 0.788741 | 1.036723 | 0.923065 | 1.095853 | 1.185303 | 1.026207 | 1.07069  | 0.686096 | 1.000699  | 0.98036  |
| stearoyl carnitin C18                           | 1.135432 | 0.945264 | 1.033652 | 1.077497 | 0.897192 | 0.810403   | 1.081391 | 0.92542  | 1.087031  | 1.153839  | 1.018391 | 0.772435 | 0.83108  | 1.108838 | 1.480402 | 1.015909 | 1.02834  | 1.065474 | 1.091841  | 1.068689 |
| succinate                                       | 0.534746 | 0.591366 | 0.738981 | 0.639073 | 0.679196 | 0.691573   | 0.851812 | 0.624793 | 0.740196  | 1.032742  | 1.287933 | 1.329223 | 1.232262 | 1.378845 | 1.258229 | 1.110987 | 1.142946 | 1.304936 | 1.096741  | 1.046074 |
| taurine                                         | 0.855558 | 0.941114 | 0.982159 | 0.730037 | 0.742269 | 0.969681   | 0.822709 | 1.112044 | 0.733594  | 0.760531  | 0.841163 | 1.088576 | 0.968638 | 0.966039 | 0.699259 | 0.823252 | 1.084742 | 0.699306 | 0.669201  | 1.242393 |
| taurodeoxycholic acid                           | 1.039949 | 1.139368 | 1.18106  | 1.124443 | 1.184949 | 1.245561   | 1.277348 | 1.088068 | 1.157577  | 1.085239  | 1.070246 | 0.936535 | 0.8377   | 0.966315 | 1.210776 | 1.283257 | 0.913117 | 0.818129 | 1.019324  | 1.026653 |
| tetraedecanoyl carnitin C14:2                   | 1.070949 | 0.896763 | 0.633708 | 0.932745 | 0.035666 | 0.036539   | 0.014088 | 0.211135 | 0.058496  | 0.055485  | 0.621909 | 0.485504 | 1.516977 | 2.758442 | 1.774842 | 0.994319 | 63.21455 | 42.96244 | 27.5091   | 27.19849 |
| tetradecenoyl carnitin C14:1                    | 0.888844 | 0.750615 | 1.069484 | 0.755857 | 0.816806 | 0.896933   | 0.871598 | 0.692112 | 0.910945  | 0.864043  | 1.479667 | 1.045863 | 1.330674 | 1.044109 | 0.999022 | 1.633048 | 1.238938 | 1.097662 | 1.148749  | 1.319944 |
| threonolactone                                  | 1.296526 | 1.005737 | 1.085818 | 1.121454 | 1.044391 | 0.895976   | 1.062731 | 1.003008 | 0.91342   | 0.866391  | 1.337535 | 0.708128 | 1.008766 | 1.745072 | 1.074752 | 1.444796 | 1.340765 | 1.153921 | 1.232681  | 1.250616 |
| threonine                                       | 0.941794 | 1.21284  | 1.08601  | 1.067584 | 1.103304 | 1.124876   | 1.094142 | 1.070528 | 1.21893   | 0.860657  | 0.926622 | 0.862994 | 0.784185 | 0.879588 | 0.888839 | 0.9374   | 0.808033 | 1.101387 | 0.807371  | 1.050711 |
| thymine                                         | 0.662022 | 0.592318 | 0.750361 | 0.714442 | 0.656985 | 0.969694   | 0.700839 | 0.693945 | 0.740624  | 1.125005  | 1.389623 | 1.411219 | 1.15546  | 1.341322 | 1.360046 | 1.36097  | 1.397876 | 1.469658 | 1.213176  | 0.850719 |
| thymine                                         | 0.635104 | 0.555309 | 0.877887 | 0.758445 | 0.635606 | 0.616774   | 0.607973 | 0.671668 | 1.035798  | 1.0845    | 1.648706 | 1.580117 | 1.352521 | 1.573795 | 1.422023 | 1.646943 | 1.380617 | 1.469027 | 1.360519  | 0.892319 |
| tyglyl carnitin or methylcrotonyl carnitin C5:1 | 1.058189 | 1.028445 | 0.88623  | 1.250233 | 1.183192 | 1.063369   | 1.123108 | 1.534195 | 1.111533  | 0.927135  | 1.064066 | 0.819896 | 0.807336 | 0.824552 | 0.906026 | 0.704849 | 0.639129 | 1.78123  | 0.985139  | 0.98349  |
| trans-Cinnamate                                 | 0.971264 | 1.029879 | 1.135773 | 1.129184 | 1.070341 | 1.032563   | 0.959292 | 0.974892 | 0.935665  | 1.027312  | 0.824583 | 0.951049 | 1.073212 | 0.824583 | 0.963219 | 0.930519 | 0.963927 | 0.964027 | 1.074721  | 0.755171 |
| trans-Hydroxycinnamic acid                      | 1.82834  | 0.893171 | 0.719938 | 0.746089 | 0.832924 | 0.798708   | 0.793665 | 0.806179 | 0.941623  | 1.139305  | 1.018998 | 1.40892  | 1.462259 | 1.520927 | 1.295027 | 1.437924 | 1.55387  | 1.490869 | 1.358045  | 1.023939 |
| triethanolamine                                 | 1.235808 | 1.226246 | 0.974871 | 1.393556 | 0.937632 | 1.962771   | 0.617905 | 1.330889 | 1.126715  | 0.63842   | 0.824504 | 1.06875  | 0.682450 | 1.06875  | 0.53403  | 0.931599 | 0.892394 | 1.026308 | 0.912938  | 1.373247 |
| tryptophan                                      | 0.950008 | 0.989567 | 1.228878 | 1.180234 | 1.13225  | 1.010483   | 0.820496 | 0.981942 | 1.006683  | 1.237427  | 0.821453 | 1.002422 | 0.798015 | 0.841653 | 0.87672  | 0.943765 | 0.942971 | 0.937219 | 0.901302  | 0.826201 |
| tyramine                                        | 1.205847 | 1.038623 | 0.930863 | 0.950889 | 1.123262 | 0.843332   | 0.880336 | 1.045642 | 1.047393  | 0.990986  | 0.922107 | 0.876534 | 0.744663 | 0.610974 | 0.87621  | 0.932165 | 0.826599 | 0.800751 | 1.064841  | 1.042635 |
| tyrosine                                        | 0.900834 | 0.936667 | 1.146189 | 1.121637 | 0.99251  | 0.993117   | 0.995544 | 0.928654 | 0.928654  | 1.046624  | 0.980881 | 0.975796 | 1.016151 | 0.806363 | 0.920881 | 0.877888 | 0.948156 | 0.968838 | 0.850109  | 0.788839 |
| uracil                                          | 0.691338 | 0.655126 | 1.168541 | 1.031326 | 0.732902 | 0.712713   | 1.194456 | 0.783878 | 0.923019  | 1.695372  | 1.104628 | 1.082511 | 1.073545 | 1.401808 | 1.441261 | 1.400654 | 0.743129 | 0.503675 | 0.986575  | 0.610514 |
| ureidopropionic acid                            | 0.719218 | 1.034159 | 0.955504 | 0.834144 | 0.678672 | 0.588065   | 0.760126 | 0.790326 | 0.764878  | 1.167452  | 0.864888 | 0.815923 | 1.084334 | 1.00858  | 1.367841 | 1.084964 | 1.002205 | 1.029996 | 0.905002  | 0.848087 |
| uric acid                                       | 0.944009 | 1.285454 | 1.179884 | 1.047181 | 1.158998 | 0.983677   | 1.047132 | 0.967723 | 0.813312  | 0.662642  | 0.894725 | 0.959386 | 1.11956  | 0.900463 | 1.011737 | 1.115489 | 1.04677  | 0.980417 | 0.696878  | 0.677814 |
| uridine                                         | 0.891424 | 0.946717 | 1.296452 | 1.266793 | 1.076907 | 1.073082   | 1.047518 | 1.253249 | 1.029829  | 1.111474  | 0.989602 | 0.900412 | 0.951215 | 1.125006 | 1.099863 | 0.870763 | 1.047879 | 0.804577 | 0.852702  | 0.852702 |
| valine                                          | 1.059116 | 1.122696 | 1.079588 | 1.06314  | 1.076891 | 1.085728</ |          |          |           |           |          |          |          |          |          |          |          |          |           |          |

|                         |          |          |          |          |          |          |          |          |          |          |          |          |          |          |          |          |          |          |          |          |
|-------------------------|----------|----------|----------|----------|----------|----------|----------|----------|----------|----------|----------|----------|----------|----------|----------|----------|----------|----------|----------|----------|
| C14:1                   | 1.061457 | 1.094677 | 1.461532 | 1.598978 | 1.620511 | 1.544483 | 1.442435 | 1.334039 | 1.485348 | 1.266817 | 1.139649 | 1.356675 | 1.353665 | 1.641059 | 1.352277 | 1.298166 | 1.181804 | 1.0713   | 1.291894 |          |
| C14:2                   | 1.023798 | 0.927072 | 1.172594 | 1.248096 | 1.38583  | 1.305668 | 1.260426 | 1.341656 | 0.976598 | 1.038819 | 0.939774 | 0.884461 | 0.869799 | 1.294318 | 0.943401 | 0.87115  | 1.035287 | 1.210556 | 0.905868 | 0.907671 |
| C15                     | 1.164185 | 1.120277 | 1.359045 | 1.876273 | 1.24132  | 1.202653 | 1.174798 | 0.886217 | 1.084202 | 0.993666 | 0.852843 | 1.16318  | 1.591904 | 0.975985 | 0.826666 | 1.156614 | 1.209717 | 1.091319 | 0.970611 | 1.114291 |
| C15:1                   | 0.964869 | 1.04607  | 0.936198 | 1.48067  | 1.01826  | 0.957287 | 0.999784 | 0.955129 | 0.894094 | 0.873399 | 0.994382 | 0.989722 | 0.999936 | 1.167454 | 0.903475 | 0.853282 | 1.019422 | 1.020757 | 0.814791 | 0.829219 |
| C15:2                   | 0.952696 | 1.111429 | 1.017529 | 1.276317 | 1.1293   | 1.133789 | 1.220479 | 1.091524 | 0.852076 | 0.790768 | 0.952207 | 1.014089 | 1.383198 | 2.069195 | 0.923318 | 0.862262 | 1.062415 | 1.00549  | 0.800619 | 0.791909 |
| C16:1                   | 1.467041 | 0.974768 | 1.132959 | 1.324548 | 1.439547 | 1.263297 | 1.407928 | 1.355718 | 0.819157 | 0.713534 | 1.144779 | 0.870678 | 1.560687 | 2.727085 | 1.146597 | 0.945951 | 1.552992 | 1.579418 | 1.746518 | 0.87637  |
| C16:2                   | 0.987404 | 1.019529 | 1.021519 | 1.350567 | 1.040338 | 0.961396 | 1.166912 | 0.991164 | 0.893341 | 0.929498 | 1.023672 | 1.020059 | 0.964767 | 1.126992 | 0.886958 | 0.901538 | 1.073496 | 1.041884 | 1.043587 | 0.866267 |
| C17                     | 1.045865 | 1.162941 | 1.016218 | 1.792939 | 1.004821 | 1.030629 | 1.124465 | 1.060921 | 1.076153 | 0.971748 | 1.021087 | 0.969273 | 1.118128 | 1.819501 | 0.875296 | 0.853899 | 1.06411  | 1.070762 | 1.079616 | 1.180558 |
| C17:1                   | 0.592155 | 1.063355 | 1.193486 | 1.152465 | 1.197407 | 0.968437 | 0.980291 | 1.153511 | 1.005515 | 1.190146 | 0.957344 | 1.014999 | 1.482358 | 2.40596  | 1.004378 | 0.87037  | 1.124233 | 1.055488 | 1.054804 | 1.175210 |
| C17:2                   | 1.082153 | 1.186934 | 0.825285 | 0.976087 | 0.912834 | 0.912788 | 0.965214 | 0.938852 | 0.848483 | 0.890967 | 1.07604  | 1.349094 | 1.014182 | 1.006426 | 0.826498 | 0.884197 | 1.044669 | 1.063061 | 0.933936 | 0.922074 |
| C18                     | 1.008212 | 1.167159 | 1.024582 | 1.720722 | 1.01345  | 0.969432 | 1.1003   | 0.999798 | 0.976486 | 0.948457 | 1.022821 | 1.169068 | 1.282687 | 1.577113 | 0.880545 | 0.907376 | 1.041626 | 1.03686  | 0.970895 | 0.854187 |
| C18:1                   | 1.469678 | 1.025081 | 1.018209 | 1.317829 | 1.03712  | 1.011989 | 1.165382 | 1.06538  | 0.920942 | 0.801649 | 1.003932 | 1.049428 | 1.365497 | 1.973213 | 0.992376 | 0.911197 | 1.146916 | 1.054244 | 0.942593 | 0.859347 |
| C18:2                   | 1.432375 | 1.027594 | 1.004877 | 1.171734 | 1.062632 | 1.009622 | 1.191939 | 1.07274  | 0.719645 | 0.579963 | 0.707201 | 0.906493 | 1.409562 | 2.256895 | 0.996666 | 0.891613 | 1.062693 | 1.054244 | 0.998437 | 0.886156 |
| C18:3                   | 0.783841 | 0.623694 | 0.988987 | 1.288657 | 1.061518 | 1.138422 | 0.949386 | 1.162358 | 0.649874 | 0.644614 | 0.912537 | 0.698558 | 1.828925 | 3.418362 | 0.879917 | 0.722995 | 1.582594 | 1.082496 | 0.724898 | 0.806739 |
| C19                     | 1.071942 | 1.018488 | 0.893249 | 0.948999 | 0.905078 | 1.02695  | 0.959826 | 0.994872 | 1.021036 | 1.003912 | 1.069652 | 1.273827 | 1.002813 | 1.149644 | 0.979669 | 0.985131 | 1.097656 | 1.014727 | 1.236539 | 0.940744 |
| C19:1                   | 1.474734 | 1.115791 | 0.998482 | 1.534145 | 0.960127 | 0.966922 | 1.053872 | 1.005327 | 0.664412 | 1.047574 | 1.083364 | 0.983822 | 0.972772 | 1.3049   | 0.987306 | 0.885146 | 1.06313  | 0.998714 | 0.971364 | 0.998189 |
| C19:2                   | 1.466044 | 0.954512 | 0.914915 | 1.752313 | 1.040765 | 1.07465  | 1.104844 | 0.98338  | 0.961124 | 1.08769  | 1.064128 | 0.983822 | 1.116513 | 1.339478 | 0.982003 | 0.973448 | 1.046418 | 1.095291 | 0.879802 | 0.924575 |
| C19:3                   | 1.687346 | 1.427831 | 1.769265 | 1.900663 | 1.276141 | 1.320452 | 1.027805 | 1.132527 | 0.978778 | 0.811717 | 1.506483 | 1.203849 | 0.920136 | 1.320775 | 1.015774 | 1.79393  | 0.8983   | 0.924027 | 1.031739 | 1.205437 |
| C20                     | 1.031742 | 1.110377 | 0.796498 | 0.688723 | 0.77946  | 0.832852 | 0.894354 | 0.823175 | 0.947582 | 0.830336 | 1.004798 | 1.272232 | 1.008822 | 0.845716 | 0.682645 | 0.864417 | 1.117087 | 0.873708 | 1.174625 | 0.848543 |
| C20:1                   | 1.220767 | 1.304668 | 0.977461 | 1.147287 | 0.959437 | 0.959522 | 1.225233 | 1.007848 | 1.08741  | 1.120474 | 1.302511 | 1.155451 | 1.116837 | 0.892429 | 0.893958 | 1.024215 | 1.05082  | 1.014396 | 0.891803 | 0.981203 |
| C20:2                   | 1.030617 | 1.085731 | 1.005711 | 1.184934 | 0.927421 | 0.951263 | 1.07098  | 0.90159  | 1.185862 | 0.986573 | 0.999369 | 1.034485 | 1.003358 | 1.192394 | 0.862381 | 0.952109 | 0.985916 | 1.007456 | 1.029646 | 1.024622 |
| C20:3                   | 1.471953 | 1.148252 | 0.961008 | 1.435693 | 0.907853 | 0.955186 | 1.102119 | 1.07128  | 1.063369 | 0.919466 | 1.082699 | 1.0375   | 1.157899 | 1.361409 | 0.959772 | 0.894927 | 0.993825 | 1.048817 | 0.995307 | 1.165235 |
| C20:4                   | 1.496408 | 1.145965 | 0.915426 | 1.986465 | 1.245934 | 1.116213 | 1.505959 | 1.139003 | 1.113387 | 0.8394   | 1.142469 | 1.084365 | 1.729375 | 1.558946 | 1.381847 | 1.193832 | 1.20431  | 1.045938 | 1.041174 | 1.043994 |
| C20:5                   | 1.00589  | 1.073194 | 0.83406  | 0.950729 | 0.568002 | 0.712233 | 0.830742 | 0.632359 | 1.018262 | 0.719042 | 0.948359 | 1.621025 | 0.86073  | 0.740709 | 0.942726 | 0.756672 | 1.050087 | 0.72124  | 1.32164  | 1.074126 |
| C21                     | 1.108157 | 1.211727 | 0.892112 | 1.003092 | 0.946691 | 1.018539 | 1.280239 | 1.065247 | 1.131671 | 0.964734 | 1.07817  | 1.28904  | 1.061877 | 1.088013 | 1.01957  | 1.18228  | 1.225322 | 1.20345  | 1.25587  | 1.031104 |
| C22                     | 1.69907  | 1.28462  | 0.901608 | 1.001227 | 0.904433 | 0.927754 | 1.337774 | 1.143162 | 1.078239 | 0.981092 | 1.090614 | 1.022554 | 0.991098 | 0.882483 | 0.977695 | 1.34293  | 0.97233  | 1.205377 | 1.094826 | 1.05953  |
| C22:1                   | 1.951411 | 1.295106 | 1.242748 | 1.500352 | 0.924368 | 1.058032 | 1.456237 | 1.097328 | 1.03703  | 1.03433  | 1.107739 | 1.10385  | 0.913237 | 1.20529  | 0.982102 | 0.925629 | 1.308331 | 1.181272 | 1.055371 | 1.042843 |
| C22:2                   | 1.681948 | 1.191896 | 1.042987 | 1.176432 | 0.989575 | 1.058403 | 1.346623 | 1.182776 | 1.19334  | 0.888674 | 1.115772 | 1.117432 | 1.245729 | 1.408629 | 0.973331 | 1.082617 | 1.210084 | 1.162307 | 1.152177 | 1.06729  |
| C22:3                   | 1.436441 | 0.997253 | 0.951108 | 1.080143 | 1.0851   | 0.997417 | 1.293986 | 1.166927 | 1.020034 | 0.806907 | 1.22087  | 1.027914 | 1.478336 | 1.933612 | 1.073971 | 1.045596 | 1.256879 | 1.24642  | 1.039849 | 1.101393 |
| C22:4                   | 1.495837 | 1.045113 | 0.935979 | 2.090559 | 1.066758 | 1.117558 | 1.565746 | 1.195145 | 0.95364  | 0.820603 | 1.201601 | 1.122624 | 1.315331 | 1.654379 | 1.161505 | 1.032026 | 1.276527 | 1.23837  | 1.154113 | 1.13433  |
| C22:5                   | 0.934759 | 0.885384 | 0.841671 | 0.842387 | 0.760099 | 1.138159 | 1.0052   | 0.906324 | 1.160718 | 0.925957 | 0.951134 | 0.90414  | 1.108936 | 0.908951 | 0.874477 | 0.999844 | 1.142723 | 1.165785 | 1.27081  | 1.018196 |
| C23                     | 0.85268  | 1.233698 | 0.844111 | 0.924513 | 0.844459 | 1.109397 | 1.009194 | 1.060489 | 1.009825 | 1.081053 | 0.943522 | 1.038314 | 0.875472 | 1.037104 | 1.007475 | 1.199411 | 1.194372 | 1.052498 | 1.272946 | 1.129488 |
| C23:1                   | 0.921239 | 1.027191 | 0.895562 | 0.784266 | 0.674921 | 0.826927 | 0.860553 | 0.745951 | 1.15573  | 0.766102 | 0.847264 | 0.974372 | 0.857525 | 0.867823 | 0.563075 | 0.785083 | 1.054681 | 0.982023 | 1.453361 | 0.806122 |
| C24                     | 1.568121 | 1.189695 | 0.780094 | 0.826943 | 0.833603 | 1.019615 | 1.109753 | 1.104749 | 1.145059 | 0.997855 | 0.99591  | 1.005446 | 0.967008 | 0.900692 | 0.884001 | 0.750758 | 1.128653 | 1.095422 | 1.188443 | 1.120327 |
| C24:1                   | 1.569444 | 1.226186 | 0.891309 | 0.878649 | 0.832357 | 0.867878 | 1.252957 | 0.981221 | 1.167271 | 1.067421 | 1.027647 | 1.031628 | 0.964783 | 0.81593  | 0.921359 | 1.109067 | 1.1622   | 1.091468 | 0.809166 | 1.13187  |
| C24:2                   | 1.738593 | 1.374569 | 0.735051 | 0.796483 | 0.796429 | 1.000527 | 1.247919 | 1.297092 | 0.998933 | 0.924018 | 0.904898 | 1.001746 | 0.8418   | 0.87074  | 0.793657 | 1.290833 | 1.185815 | 1.135304 | 1.053763 | 0.876304 |
| C24:3                   | 1.814007 | 1.268438 | 0.821063 | 1.040255 | 0.89406  | 0.947673 | 1.428309 | 1.117041 | 1.142995 | 1.070573 | 0.968348 | 1.026027 | 0.907951 | 0.8907   | 1.025473 | 0.956729 | 1.226417 | 1.137088 | 1.069368 | 0.977088 |
| C24:4                   | 2.061179 | 1.356627 | 0.897323 | 1.122545 | 1.150128 | 1.074971 | 1.346919 | 1.157639 | 0.997447 | 0.817326 | 0.950969 | 1.050277 | 1.169151 | 1.669018 | 0.967462 | 1.067625 | 1.153504 | 1.182861 | 1.164076 | 1.001187 |
| C25                     | 0.725805 | 0.875111 | 0.950567 | 1.200292 | 1.052091 | 1.411606 | 0.933364 | 1.032238 | 1.151724 | 1.097514 | 1.383557 | 1.144768 | 1.676463 | 1.336163 | 1.591297 | 1.085529 | 1.237066 | 1.617144 | 1.332273 | 0.981639 |
| carbamoyl glycine       | 0.843132 | 1.12982  | 0.927211 | 0.724727 | 0.835423 | 1.040009 | 0.948578 | 0.927745 | 0.996328 | 1.113786 | 0.984716 | 1.038262 | 0.952663 | 0.959039 | 1.004206 | 0.985665 | 0.98273  | 0.80623  | 0.991629 | 0.913929 |
| carboxymethyl phosphate | 0.937378 | 1.017611 | 0.763421 | 0.707037 | 0.813039 | 0.764515 | 0.90117  | 0.948371 | 0.865331 | 1.003034 | 0.988313 | 0.985877 | 0.911145 | 0.841521 | 0.904448 | 0.898982 | 1.018171 | 0.899212 | 1.018171 | 0.899212 |
| carntine                | 0.819027 | 1.034535 | 1.012658 | 0.907965 | 0.976098 | 1.094202 | 0.97181  | 0.966445 | 0.845708 | 0.941404 | 0.894292 | 0.897448 | 1.020198 | 0.937647 | 1.028253 | 0.97334  | 0.932807 | 0.925344 | 0.965666 | 0.652573 |
| carnosine               | 0.690284 | 0.888177 | 0.950398 | 1.048717 | 0.896322 | 0.851234 | 1.145716 | 1.252329 | 1.116356 | 0.925381 | 0.877442 | 0.814943 | 0.945829 | 0.911998 | 0.888212 | 0.948789 | 0.978408 | 0.754589 | 0.927629 | 1.01928  |
| catechol sulfate        | 0.436198 | 0.153448 | 1.234627 | 1.243034 | 2.234405 | 2.962052 | 0.940093 | 0.924959 | 1.37142  | 1.24557  | 4.2445   | 1.941169 | 2.928226 | 2.452498 | 2.547926 | 23.4215  | 12.1917  | 14.9126  | 1.168055 | 1.305242 |
| cholesterol sulfate     | 1.023543 | 1.086762 | 1.020142 | 0.986237 | 0.982676 | 1.107205 | 1.028263 | 1.041046 | 1.01115  | 1.00488  | 1.014241 | 0.922416 | 0.827244 | 0.980533 | 0.962747 | 1.234791 | 1.123694 | 0.937239 | 1.295191 | 1.04111  |
| cinnamoyl glycine       | 0.973455 | 1.440027 | 1.137535 | 1.048829 | 1.007708 | 1.02218  | 1.116411 | 1.083083 | 0.95423  | 1.076524 | 1.102629 | 1        |          |          |          |          |          |          |          |          |

Table with 10 columns: Compound Name, and 20 columns of numerical values. The compounds listed include Isolevaleryl carnitine C5, kynurenic acid, l-tyrosine, lactate, lauroyl carnitine C12, leucine, L-Fucose, linoleoyl carnitine C18:2, lithocholic acid, L-Rhamnose, L-Threonic acid, lysine, malate, m-coumaric acid, methylamine, methylethylamine, methylmalonic acid, m-Hydroxyhippuric acid, myristoyl carnitine C14, N-[3-Phenylpropionyl] carnitine, N-N-dimethylarginine, N-6-NG-Trimethyllysine, N-acetyl-alanine, N-acetyl-arginine, N-acetyl-asparagine, N-acetyl-aspartate, N-acetyl-glutamate, N-acetyl-glycine, N-acetyl-histidine, N-acetyl-L-ornithine, N-acetyl-threonine, N-acetyl-tryptophan, N-acetyl-tyrosine, N-Butyryl-glycine, N-Carbamoylsarcosine, N-Formyl-L-methionine, nicotianamide, N-Octanoylglycine, N-Tyrosyl-glycine, octanoyl carnitine C8, oleoyl carnitine C18:1, O-Phosphorylthalamine, ornithine, palmitoyl carnitine C16, p-aminobenzoate, pantothenate, phenol, phenol sulphate, phenylacetic acid, phenylacetylglycine, phenylalanine, phenylpropionyl-glycine, phenylpyruvate, p-hydroxybenzoate, picopicolic acid, proline, proline betaine, propionate, propionyl carnitine C3, propionyl-glycine, pseudouridine, pyrrolidinic acid, pyruvate, retinoic acid, riboflavin, ribose, ribothymidine, ribosyl carnitine, serine, serotonin, stialic acid, S-methyl-S-thioadenosine, sorbitol, stearyl carnitine C18, succinate, synephrine, taurine, tauoroxyacetic acid, tetradecadienyl carnitine C14:2, tetradecenyl carnitine C14:1, threonine, thymidine, thymine, tigli/ carnitine or methylcrotonyl carnitine C5:1, trans-Cinnamate, trans-Hydroxydicinnamic acid, triethanolamine, tryptophan, tyramine, tyrosine, uracil, ureidopropionic acid, ureic acid, uridine, valine, xanthine, xanthosine, and metabolites.

Table with 10 columns: Metabolite Name, spleen, spleen, spleen, spleen, spleen, spleen, spleen, spleen, spleen, head, head, head, head, head, head, head, head, head, head. The metabolites listed include 1-methyladenosine, 1-methyl-histidine, 3-thiodydroxybenzoic acid, 3-Pyridinedicarboxylic acid, 2-aminothioacetic acid, 2-dehydrogluconate, 2-Oxooxy-D-ribose, 2-hydroxy Hippuric acid, 2-Hydroxybutyrate, 2-hydroxy-isovalerate, 2-Hydroxyoctanoic acid, 2-Hydroxypropionic acid, 2-Ketobutyric acid, 2-Keto-isopropanoate, and 2-Keto-isovalerate.

|                                   |          |          |          |          |          |          |          |          |          |          |          |          |          |          |          |          |          |          |          |          |
|-----------------------------------|----------|----------|----------|----------|----------|----------|----------|----------|----------|----------|----------|----------|----------|----------|----------|----------|----------|----------|----------|----------|
| 2-Methylbutyrylglycine            | 0.910756 | 0.97975  | 0.932126 | 0.980236 | 0.990158 | 0.980478 | 0.918537 | 0.885273 | 1.272602 | 0.970241 | 0.922579 | 0.832297 | 0.996878 | 1.070266 | 0.994059 | 1.066108 | 1.047688 | 0.962046 | 0.904622 | 0.975144 |
| 2-Methylsuccinic acid             | 1.076356 | 1.203553 | 1.132845 | 0.642472 | 0.874261 | 0.858231 | 0.761973 | 0.832388 | 0.606612 | 0.839746 | 1.029803 | 0.876139 | 1.331874 | 0.673154 | 0.948016 | 0.562634 | 0.515289 | 0.972842 | 0.591626 | 0.889359 |
| 2-Oxoadipic acid                  | 1.150901 | 0.992570 | 0.908721 | 1.078148 | 1.090917 | 0.907323 | 0.993718 | 0.973752 | 0.692497 | 0.869879 | 1.114849 | 0.106891 | 0.457569 | 0.698974 | 0.876236 | 0.71889  | 0.21821  | 1.35092  | 1.260001 | 0.611338 |
| 3-Phenylpropionic acid            | 0.510323 | 0.542323 | 0.65079  | 0.632965 | 1.00753  | 0.809848 | 0.747071 | 0.525886 | 0.981351 | 0.915526 | 0.517507 | 0.603263 | 0.677795 | 0.617128 | 0.951083 | 0.845575 | 0.903413 | 0.873048 | 0.889332 | 0.935189 |
| 3-(3-Methoxyphenyl)propionic acid | 0.843425 | 1.073622 | 0.826067 | 1.106126 | 1.02418  | 0.970548 | 0.939954 | 0.917969 | 1.184796 | 0.853197 | 0.978235 | 1.023264 | 0.907275 | 1.132731 | 0.979852 | 1.046468 | 0.950921 | 0.952629 | 1.262719 | 1.114119 |
| 3-4-Dihydroxybenzoic acid         | 0.748253 | 0.873262 | 0.946939 | 0.657021 | 1.270994 | 1.302843 | 0.848278 | 0.898273 | 1.277418 | 1.066645 | 0.895873 | 1.150431 | 0.98616  | 0.865959 | 0.983563 | 1.07397  | 1.025522 | 1.058687 | 0.906609 | 1.004216 |
| 3-4-Dihydroxydihydrocinnamic acid | 0.767419 | 1.176234 | 1.021871 | 0.756644 | 1.079645 | 1.206788 | 0.846825 | 0.922662 | 0.691121 | 1.04502  | 1.278846 | 1.262787 | 1.001483 | 0.827366 | 1.130176 | 1.133944 | 1.020269 | 0.985789 | 0.898285 | 0.974656 |
| 3-Hydroxyanthranilic acid         | 1.22153  | 1.04633  | 0.902334 | 1.003366 | 0.87355  | 1.131841 | 0.934201 | 1.023272 | 1.017784 | 1.027311 | 1.190703 | 0.947393 | 1.102717 | 1.316138 | 1.020667 | 1.027957 | 0.997487 | 1.094524 | 0.988838 | 0.895774 |
| 3-Hydroxybenzoic acid             | 0.697773 | 1.086131 | 0.854361 | 0.92098  | 0.97238  | 0.925464 | 0.836829 | 0.913776 | 0.913489 | 0.917439 | 0.941553 | 1.130923 | 0.94465  | 0.920302 | 1.071591 | 0.993944 | 0.982412 | 1.071293 | 0.942505 | 1.021448 |
| 3-Hydroxybutyrate                 | 0.957119 | 0.892349 | 0.856054 | 1.134153 | 1.180907 | 1.178246 | 0.953855 | 1.024202 | 0.849834 | 0.9298   | 0.9632   | 1.025394 | 1.086194 | 1.261929 | 0.959121 | 0.990954 | 0.862029 | 0.958907 | 0.779913 | 0.906008 |
| 3-Hydroxyisobutyrate              | 0.9241   | 0.930101 | 0.80307  | 0.974322 | 1.023408 | 0.972625 | 0.866843 | 0.980086 | 0.91377  | 1.011497 | 1.253838 | 1.045875 | 0.947349 | 1.064423 | 1.014223 | 0.989214 | 0.960458 | 0.991735 | 1.026224 | 0.97267  |
| 3-Hydroxyphenyllactate            | 0.759018 | 1.152602 | 0.986931 | 0.757954 | 1.079645 | 1.206788 | 0.846825 | 0.922662 | 0.899161 | 1.04502  | 1.098439 | 1.151459 | 1.001483 | 0.827366 | 1.130176 | 1.133944 | 1.020269 | 0.985789 | 0.898285 | 0.974656 |
| 3-Methoxytyramine                 | 1.014007 | 0.908276 | 1.165394 | 1.209373 | 0.836885 | 1.29674  | 0.814962 | 1.000346 | 1.157432 | 0.921279 | 0.959439 | 0.883738 | 0.941748 | 1.201803 | 1.032218 | 1.088218 | 1.096785 | 1.171123 | 1.021301 | 0.976152 |
| 3-Methylindole                    | 0.762616 | 0.948729 | 0.976527 | 0.887811 | 1.145661 | 1.113497 | 0.952447 | 0.730129 | 0.932318 | 0.802413 | 0.954987 | 0.979548 | 1.058903 | 1.185142 | 0.965837 | 1.123137 | 0.918804 | 0.956559 | 0.892083 | 0.996441 |
| 3-phenylpropionic acid            | 0.455937 | 0.545328 | 0.653052 | 0.792457 | 1.207755 | 1.159073 | 0.791895 | 0.732625 | 0.926091 | 1.018016 | 0.526644 | 0.545457 | 0.663603 | 0.735214 | 0.922935 | 0.881555 | 1.037607 | 1.212424 | 1.159664 | 1.141555 |
| 4-Aminohippuric acid              | 0.763177 | 1.155432 | 0.839818 | 0.698607 | 0.953812 | 1.002387 | 0.258817 | 0.903317 | 1.201494 | 1.045603 | 1.103495 | 0.947334 | 0.925752 | 1.122039 | 0.962021 | 0.610952 | 0.854479 | 0.616252 | 0.682324 |          |
| 4-Methylvaleric acid              | 0.894985 | 1.897322 | 0.847675 | 1.017895 | 1.044117 | 0.928327 | 0.761878 | 0.65727  | 0.959437 | 0.959757 | 1.080135 | 1.130315 | 1.329436 | 1.724877 | 0.905795 | 0.922701 | 0.975284 | 0.85523  | 0.923472 | 0.949451 |
| 4-Pyridoxal acid                  | 0.832084 | 1.182997 | 1.034233 | 1.011584 | 0.981332 | 1.046561 | 0.850142 | 0.92975  | 0.981164 | 1.026289 | 0.759788 | 1.124751 | 1.136714 | 1.252556 | 1.094529 | 0.947676 | 0.7846   | 1.059    | 0.853638 | 0.969611 |
| 5-Hydroxylsine                    | 0.840036 | 1.120726 | 1.358727 | 1.063613 | 1.12168  | 0.810104 | 0.97923  | 1.055224 | 1.065135 | 1.115403 | 0.969542 | 1.176497 | 1.44248  | 1.158637 | 1.06512  | 0.976333 | 0.927859 | 1.110721 | 0.991986 | 0.648008 |
| 5-Keto-D-glucionic acid           | 1.109913 | 0.838466 | 1.257618 | 1.012042 | 0.788883 | 0.833255 | 0.884205 | 0.984007 | 0.896969 | 0.702407 | 1.109058 | 0.92035  | 0.884112 | 0.867002 | 0.98982  | 0.96299  | 1.22360  | 1.102734 | 1.382439 | 1.442333 |
| 5-Methylcystine                   | 1.271329 | 1.138722 | 1.456064 | 1.232624 | 1.039858 | 0.689188 | 0.881278 | 1.147424 | 1.500713 | 1.575384 | 1.16414  | 0.826492 | 0.980299 | 0.866539 | 1.01737  | 0.91887  | 0.982966 | 1.082862 | 0.919841 | 0.93726  |
| 5-Methyltyrosine                  | 0.412939 | 0.832199 | 0.48734  | 0.520872 | 0.764718 | 0.815072 | 0.479965 | 0.537747 | 0.36299  | 0.432568 | 1.914774 | 1.50212  | 2.019503 | 3.24901  | 3.60008  | 6.74867  | 7.320793 | net mass | 7.81764  | 2.381714 |
| acetate                           | 0.61209  | 0.465726 | 0.743825 | 0.887459 | 1.0036   | 0.998376 | 0.710439 | 0.80231  | 0.704101 | 0.752748 | 0.789753 | 0.773629 | 1.400208 | 1.450728 | 0.958035 | 1.029752 | 0.952503 | 1.025576 | 0.509904 | 0.848838 |
| acetoacetate                      | 1.142084 | 1.015597 | 1.186073 | 0.966443 | 1.01837  | 0.863951 | 1.112171 | 1.224691 | 0.938045 | 0.938428 | 0.841757 | 1.057828 | 0.865068 | 0.950208 | 0.830448 | 0.917035 | 1.038515 | 1.026846 | 1.089339 | 1.088337 |
| acetyl carnitine C2               | 1.062587 | 0.85947  | 1.047322 | 1.056888 | 0.947024 | 0.949479 | 1.021188 | 1.126793 | 0.912313 | 0.945153 | 1.057726 | 0.727972 | 0.947187 | 0.822704 | 0.972202 | 0.921719 | 1.050582 | 1.051458 | 1.090319 | 1.074481 |
| acetylcholine                     | 0.993122 | 0.833208 | 0.972987 | 0.821865 | 0.820948 | 0.760683 | 0.818962 | 0.942244 | 1.000142 | 0.818886 | 0.939229 | 0.776345 | 1.008617 | 0.868804 | 0.867622 | 1.077112 | 1.223316 | 0.958036 | 0.861476 | 0.828202 |
| acetyl-isoleucine                 | 0.820163 | 1.057994 | 0.700111 | 0.866881 | 1.011186 | 1.392399 | 0.880017 | 0.894621 | 1.336616 | 1.05472  | 0.900261 | 1.227536 | 1.106876 | 0.999482 | 0.999778 | 0.862685 | 0.954446 | 1.050971 | 0.870712 | 0.943895 |
| acetyl-succinate                  | 1.051027 | 0.890239 | 0.887297 | 0.894027 | 0.884376 | 0.765033 | 0.812321 | 0.957581 | 0.971843 | 0.894487 | 1.04251  | 0.902185 | 1.04708  | 0.846596 | 0.920032 | 0.812664 | 1.009964 | 1.000007 | 0.975151 | 1.056514 |
| acetylvaline                      | 0.82279  | 0.887128 | 0.721386 | 0.773333 | 0.738914 | 0.891799 | 0.914942 | 0.876634 | 0.807402 | 0.8287   | 1.255581 | 0.936277 | 0.911475 | 0.91164  | 0.95112  | 0.87834  | 0.883267 | 0.802367 | 0.961395 | 0.900666 |
| adenosine                         | 0.881247 | 0.884181 | 0.46636  | 0.563876 | 0.528213 | 0.533396 | 0.80167  | 0.519843 | 0.853593 | 0.661164 | 1.198597 | 1.064275 | 0.594066 | 0.678353 | 0.632906 | 0.908573 | 0.803267 | 0.873695 | 0.969796 |          |
| adenosine                         | 1.07611  | 1.33534  | 1.116403 | 1.155291 | 1.174183 | 1.288072 | 1.276835 | 1.181057 | 1.116697 | 1.1374   | 1.079334 | 1.231418 | 0.93053  | 1.054282 | 1.029788 | 1.203483 | 0.940718 | 1.056248 | 1.090631 | 1.194275 |
| alpha-ketoglutarate               | 0.944219 | 0.969479 | 0.961286 | 0.922563 | 1.014227 | 0.822666 | 0.960906 | 1.035355 | 0.952482 | 0.863111 | 0.975715 | 1.016309 | 0.934978 | 1.080033 | 1.025481 | 0.980439 | 0.970651 | 0.940686 | 0.866833 | 0.81167  |
| alanine                           | 1.063922 | 0.872529 | 1.04825  | 0.537669 | 0.67309  | 0.875092 | 0.828353 | 0.935872 | 1.051642 | 1.11777  | 1.041061 | 0.779504 | 0.949682 | 0.878825 | 0.903244 | 0.750522 | 0.872516 | 1.102998 | 0.86707  | 0.828202 |
| allantoate                        | 0.89049  | 0.913893 | 0.854194 | 0.941604 | 0.940413 | 0.91879  | 0.874363 | 0.891684 | 0.888107 | 0.890514 | 0.895392 | 0.96378  | 1.005076 | 1.048664 | 1.008625 | 0.901718 | 1.019759 | 0.957935 | 0.75735  | 0.775817 |
| allantoin                         | 0.869641 | 1.016104 | 0.967885 | 0.917858 | 0.988521 | 0.981343 | 0.962809 | 1.006056 | 0.909789 | 0.952917 | 0.941026 | 1.03129  | 1.033366 | 1.077484 | 0.981374 | 1.063513 | 0.974779 | 0.947649 | 0.940422 | 0.882521 |
| amino adipic acid                 | 0.896254 | 0.950083 | 0.872261 | 0.828518 | 0.950318 | 0.904524 | 0.921891 | 1.03147  | 0.883935 | 0.939531 | 1.139238 | 0.864071 | 0.947183 | 1.031727 | 1.06312  | 0.984964 | 0.916609 | 1.066929 | 0.979561 |          |
| aminolevulinic acid               | 0.757341 | 0.89478  | 1.108165 | 1.33436  | 1.054943 | 1.058089 | 0.972996 | 0.899498 | 1.713733 | 0.848073 | 0.880568 | 0.896495 | 0.812461 | 0.886286 | 0.996032 | 1.10631  | 1.157384 | 1.028276 | 1.107373 | 0.996878 |
| anthranilate                      | 1.634405 | 1.03076  | 0.721765 | 1.278321 | 1.04378  | 1.030092 | 0.957627 | 1.141854 | 0.990822 | 1.241958 | 1.392086 | 0.644425 | 1.100212 | 1.485689 | 0.976945 | 1.342651 | 1.152471 | 1.510918 | 1.598509 | 0.941831 |
| arachidoyl carnitine              | 0.832852 | 0.954209 | 1.178668 | 1.157231 | 1.043956 | 1.000714 | 0.952211 | 1.023917 | 1.12312  | 1.024858 | 0.907928 | 0.907679 | 1.039398 | 1.075297 | 1.011662 | 0.954606 | 0.915311 | 0.983394 | 0.974564 | 0.887177 |
| arginine                          | 1.037603 | 0.884003 | 0.73959  | 0.707695 | 0.917056 | 0.895462 | 1.432989 | 1.869583 | 1.396562 | 1.396562 | 0.470787 | 0.865358 | 0.986657 | 1.056603 | 0.970727 | 1.355607 | 1.326294 | 0.797321 | 1.05604  | 0.797321 |
| ascorbic acid                     | 0.982324 | 1.14321  | 1.189533 | 1.195959 | 0.924849 | 1.08303  | 1.030626 | 1.130997 | 1.160871 | 1.108071 | 0.990427 | 1.071786 | 0.893337 | 0.965677 | 0.905212 | 0.988705 | 0.901388 | 0.953786 | 0.851907 | 0.912175 |
| asparagine                        | 1.702675 | 1.585514 | 2.260379 | 2.068658 | 1.305505 | 1.663742 | 1.784741 | 2.299416 | 1.131677 | 1.210526 | 0.709614 | 0.948192 | 0.91485  | 1.061274 | 0.923544 | 1.274935 | 0.803635 | 0.733174 | 0.833759 | 0.786693 |
| aspartate                         | 1.017567 | 0.907276 | 0.904458 | 0.974688 | 0.979741 | 1.028084 | 0.947278 | 0.864098 | 0.938752 | 0.906337 | 1.026313 | 0.947471 | 0.923786 | 1.087828 | 1.013969 | 0.881718 | 0.967347 | 1.001776 | 1.007127 | 0.971607 |
| BAIBA                             | 1.034831 | 0.98948  | 0.943925 | 1.353467 | 1.159499 | 1.152556 | 0.873028 | 0.777933 | 1.098941 | 1.044878 | 1.088716 | 0.819164 | 0.840331 | 1.147811 | 0.961056 | 1.160254 | 1.151566 | 0.87401  | 1.033886 | 1.07987  |
| BAIBA                             | 1.775888 | 1.208301 | 1.96941  | 1.905331 | 1.945616 | 1.800246 | 1.406729 | 1.042384 | 1.080897 | 1.119166 | 0.83143  | 0.987294 | 1.575632 | 1.529398 | 1.093131 | 1.066284 | 1.114593 | 0.917847 | 1.440336 | 1.268007 |
| biotin                            | 0.34483  | 0.292124 | 0.234098 | 0.261204 | 0.98961  |          |          |          |          |          |          |          |          |          |          |          |          |          |          |          |

|                               |          |          |          |          |          |          |          |          |          |          |          |          |          |          |          |          |          |          |           |          |
|-------------------------------|----------|----------|----------|----------|----------|----------|----------|----------|----------|----------|----------|----------|----------|----------|----------|----------|----------|----------|-----------|----------|
| dimethylglycine               | 0.708643 | 0.890746 | 0.833997 | 0.999955 | 0.706332 | 0.830007 | 0.830223 | 0.56149  | 1.115985 | 0.626897 | 0.702278 | 0.962127 | 0.7158   | 0.821661 | 0.980897 | 1.008831 | 0.593932 | 0.611728 | 0.626313  | 0.814137 |
| Dl-3-4-dihydroxymandelic acid | 0.858882 | 0.885518 | 0.643693 | 0.827901 | 0.822222 | 0.672584 | 0.915387 | 0.994779 | 1.062289 | 0.924028 | 0.898177 | 1.45625  | 0.90783  | 1.056158 | 1.61485  | 1.54266  | 0.848307 | 0.87876  | 1.332279  | 0.927277 |
| Dihydroxy carnitine C12:1     | 0.150310 | 0.107816 | 0.960034 | 0.769163 | 0.946992 | 0.625947 | 0.409277 | 1.482291 | 1.150991 | 1.072072 | 0.618593 | 0.567531 | 0.736011 | 0.616434 | 1.759426 | 0.84292  | 1.044482 | 0.96108  | 1.061108  | 0.916018 |
| D-Phenylacetic acid           | 0.106327 | 1.007416 | 0.925831 | 1.049911 | 1.145405 | 0.972524 | 0.878465 | 0.798388 | 0.909522 | 0.869489 | 1.139591 | 1.043204 | 1.059477 | 1.012959 | 1.009116 | 1.118072 | 0.842326 | 0.815004 | 1.183144  | 0.945259 |
| Equol                         | 0.627591 | 0.931988 | 0.993354 | 1.240322 | 0.617971 | 0.83277  | 0.896961 | 0.550449 | 0.677155 | 1.30419  | 0.811619 | 0.865663 | 0.944904 | 1.37378  | 1.101032 | 0.84824  | 1.034312 | 0.666002 | 0.665544  | 0.917495 |
| formate                       | 0.989657 | 1.227    | 0.850274 | 1.109569 | 1.286989 | 1.190996 | 1.217566 | 1.01607  | 0.81619  | 0.930333 | 1.054822 | 0.736113 | 1.404445 | 1.30044  | 1.147902 | 1.217566 | 0.625031 | 0.941248 | 0.937571  | 0.688687 |
| fumarate                      | 1.103708 | 1.274289 | 0.999188 | 1.191555 | 1.085808 | 1.21096  | 0.973222 | 1.06281  | 1.08123  | 1.162334 | 1.080979 | 1.191064 | 0.99947  | 1.09332  | 1.062980 | 1.136935 | 0.967364 | 1.041248 | 1.067536  | 1.164554 |
| galacturonic acid             | 1.039129 | 1.120726 | 0.987321 | 1.063613 | 1.12168  | 1.105326 | 1.027845 | 1.112763 | 1.044887 | 1.115403 | 0.9999   | 1.176497 | 1.151272 | 1.158637 | 1.106512 | 1.031092 | 0.877999 | 1.00777  | 0.887702  | 0.964808 |
| gamma-butyrobetaine           | 1.062584 | 0.85947  | 0.941546 | 0.732586 | 0.91033  | 0.955659 | 0.991139 | 1.120737 | 0.913304 | 0.945044 | 1.057759 | 0.929156 | 0.94644  | 0.828534 | 0.972202 | 0.808645 | 1.039999 | 1.050469 | 1.089718  | 1.073883 |
| glucosylactone                | 1.655581 | 1.681379 | 1.248028 | 1.190307 | 1.017475 | 0.927567 | 1.340801 | 1.545152 | 1.879664 | 2.771992 | 2.454848 | 2.930408 | 0.929784 | 1.261737 | 0.725069 | 1.635294 | 3.895118 | 8.516462 | 1.587479  | 2.337744 |
| glucosamine                   | 0.972919 | 1.022091 | 0.919869 | 0.919111 | 0.891719 | 0.870976 | 0.882884 | 0.882884 | 0.942374 | 0.877789 | 1.047653 | 1.067246 | 0.904592 | 1.014843 | 0.950568 | 0.878083 | 0.971501 | 0.988314 | 0.942683  | 0.931301 |
| glucose                       | 0.85591  | 0.770464 | 0.748515 | 0.753692 | 0.95069  | 0.879389 | 0.823631 | 0.843064 | 0.760151 | 0.793212 | 0.909652 | 1.008924 | 0.965304 | 0.949573 | 0.951939 | 0.9246   | 0.860117 | 0.914283 | 0.866179  | 0.851192 |
| glutamate                     | 0.85036  | 0.959365 | 1.201892 | 1.094584 | 1.028911 | 1.029904 | 1.005657 | 1.040434 | 0.832213 | 0.881876 | 0.696403 | 0.875616 | 0.983965 | 0.921513 | 0.901294 | 0.921992 | 0.74115  | 0.7722   | 0.675726  | 0.699649 |
| glutamine                     | 1.112211 | 1.253505 | 1.002851 | 1.071038 | 0.900811 | 0.865338 | 0.89102  | 1.037159 | 1.141358 | 1.242784 | 1.257242 | 1.405334 | 0.955569 | 0.924699 | 1.075328 | 1.198228 | 0.95519  | 0.95891  | 1.257783  | 1.158463 |
| glycerate                     | 0.987546 | 0.916381 | 0.820559 | 1.077094 | 1.121232 | 0.999955 | 0.881077 | 0.859001 | 1.027968 | 1.019484 | 1.163249 | 0.827335 | 0.861886 | 1.084738 | 1.027032 | 1.027794 | 1.009451 | 0.989957 | 0.948908  | 0.927143 |
| glycerol-3-phosphate          | 1.190798 | 1.63829  | 2.910552 | 1.986438 | 1.912232 | 1.457336 | 1.664316 | 1.783533 | 1.325378 | 1.018234 | 1.081559 | 0.914427 | 0.932628 | 1.265586 | 1.027778 | 0.87318  | 1.194917 | 1.230175 | 0.908158  | 0.725653 |
| glycine                       | 0.952429 | 0.993422 | 0.973419 | 0.873171 | 0.950762 | 0.928543 | 0.905057 | 0.992815 | 0.878356 | 1.021629 | 0.971649 | 1.069644 | 0.897678 | 0.992249 | 0.88979  | 1.020411 | 0.902603 | 0.959947 | 0.965174  | 1.005914 |
| glycolcholic acid             | 0.819611 | 1.123406 | 1.119635 | 1.099591 | 2.317427 | 2.249626 | 1.025247 | 0.975483 | 1.351127 | 1.021692 | 0.78095  | 0.963892 | 1.263506 | 1.362049 | 1.018739 | 0.990759 | 0.896371 | 0.91731  | 1.06369   | 1.02738  |
| glycodeoxycholic acid         | 1.003571 | 1.081499 | 1.12119  | 1.51294  | 2.191497 | 2.21464  | 1.275603 | 1.361027 | 1.048785 | 0.679332 | 0.798786 | 0.597706 | 0.663912 | 1.04006  | 0.802193 | 0.743883 | 0.915885 | 1.147666 | 0.843809  | 0.87129  |
| glycyl-L-proline              | 1.339755 | 1.23925  | 1.002394 | 1.338379 | 0.976662 | 1.194539 | 0.801181 | 0.915977 | 1.070934 | 1.171943 | 1.233487 | 1.17087  | 0.679032 | 0.635766 | 0.846009 | 0.841522 | 1.029749 | 1.163207 | 1.1045918 | 1.05918  |
| glycyamine                    | 0.725549 | 0.853312 | 1.053233 | 0.926625 | 1.004689 | 1.202935 | 1.103676 | 1.118567 | 1.146312 | 1.188356 | 0.869414 | 0.944042 | 0.972556 | 0.93835  | 0.945284 | 0.979319 | 1.092319 | 1.121464 | 0.939269  | 0.925136 |
| guanine                       | 1.308817 | 1.04564  | 1.20095  | 1.202022 | 1.20519  | 1.245741 | 1.699028 | 1.249144 | 1.370301 | 1.470693 | 1.077073 | 1.142109 | 1.057676 | 1.00051  | 1.053279 | 1.251549 | 1.153269 | 0.950743 | 1.305681  | 1.327386 |
| guanosine                     | 2.701224 | 2.149409 | 1.760305 | 2.518968 | 1.466373 | 5.85415  | 1.522914 | 1.586111 | 1.089391 | 1.025145 | 1.369546 | 1.340854 | 0.633723 | 0.779606 | 0.665735 | 1.737409 | 0.654513 | 0.959235 | 1.349249  | 1.198419 |
| hexadecenoyl carnitine C16:1  | 1.086217 | 1.131679 | 0.759437 | 1.052999 | 0.994878 | 0.849699 | 1.016016 | 1.353097 | 1.17743  | 0.958571 | 0.636184 | 0.92737  | 0.964441 | 1.151397 | 1.107107 | 1.44009  | 0.654513 | 1.010919 | 1.156899  | 0.92763  |
| hexanoyl carnitine C6         | 1.057224 | 1.376795 | 1.196927 | 1.127238 | 1.109449 | 0.983887 | 0.845115 | 1.05169  | 0.9177   | 0.729548 | 0.760487 | 0.848404 | 0.994693 | 0.956659 | 1.105021 | 1.017012 | 0.966311 | 1.039966 | 1.137562  | 1.06673  |
| hippuric acid                 | 1.143575 | 0.862516 | 0.806895 | 0.719943 | 1.101871 | 0.862752 | 0.89967  | 1.236672 | 1.133724 | 0.915071 | 1.025627 | 0.866619 | 0.798686 | 0.953124 | 0.82466  | 1.075419 | 1.166765 | 1.023135 | 1.08119   | 1.110072 |
| homoarginine                  | 1.150814 | 0.906667 | 1.096073 | 0.711881 | 0.847862 | 0.778448 | 0.868891 | 1.114467 | 1.0408   | 1.048    | 1.092594 | 0.76773  | 0.920552 | 0.735767 | 0.806672 | 0.761568 | 1.016931 | 1.124511 | 1.030841  | 1.002118 |
| homocarnosine                 | 1.145998 | 1.042442 | 1.24401  | 0.766778 | 0.975514 | 0.976534 | 1.200341 | 1.194411 | 0.906756 | 1.110182 | 1.130282 | 0.894894 | 1.237169 | 0.738528 | 0.889892 | 0.752483 | 1.056585 | 1.152392 | 1.079338  | 1.022746 |
| homocitulline                 | 1.097599 | 0.849123 | 1.222975 | 0.568472 | 0.784928 | 0.926264 | 0.950092 | 1.118082 | 0.912064 | 1.053031 | 1.015968 | 0.637772 | 1.011659 | 0.736955 | 0.892827 | 0.726902 | 1.029598 | 1.040632 | 1.065504  | 1.092743 |
| homocystine                   | 0.911661 | 0.847463 | 0.715364 | 1.065807 | 1.1012   | 1.004865 | 0.977873 | 0.801993 | 0.992023 | 0.952044 | 1.009976 | 0.961427 | 0.816822 | 1.121553 | 0.97751  | 1.04527  | 1.028948 | 1.041434 | 0.973892  | 1.04774  |
| homocysteine                  | 0.972684 | 0.94255  | 0.941009 | 0.778059 | 0.942131 | 1.090108 | 0.966439 | 0.998706 | 0.861082 | 1.041342 | 1.020554 | 0.95906  | 1.072489 | 0.952694 | 1.059942 | 1.036564 | 1.02502  | 0.913475 | 1.153698  | 1.116619 |
| homogentisic acid             | 0.943163 | 1.322446 | 1.549483 | 1.493341 | 1.338395 | 1.586841 | 0.901559 | 0.69573  | 0.861148 | 0.94187  | 1.013306 | 0.933085 | 1.531425 | 1.856227 | 0.946777 | 1.350050 | 1.059936 | 1.058435 | 0.877368  | 1.146451 |
| hydroquinone                  | 0.697607 | 0.972219 | 0.9651   | 0.930528 | 0.919443 | 0.992291 | 0.871926 | 0.900904 | 0.898324 | 0.916698 | 1.0001   | 0.926716 | 0.974103 | 1.004319 | 1.070851 | 1.073592 | 0.956057 | 0.98962  | 0.934122  | 0.699374 |
| hydroxyindoleacetic acid      | 0.730053 | 1.132909 | 1.11592  | 1.234412 | 1.166324 | 1.291932 | 0.562621 | 1.072111 | 0.895681 | 0.701774 | 0.649836 | 1.103832 | 0.914946 | 1.066675 | 0.960164 | 1.217444 | 1.211048 | 0.887908 | 0.981179  | 0.853752 |
| hydroxyphenyllactic acid      | 0.786259 | 1.360905 | 0.702234 | 1.436119 | 1.105413 | 1.11687  | 0.562621 | 0.922662 | 0.59925  | 0.874816 | 1.1294   | 0.921003 | 1.369479 | 1.459663 | 1.248601 | 1.21801  | 1.211048 | 0.965789 | 1.642853  | 1.100072 |
| hydroxyphenylpyruvate         | 1.099531 | 0.825782 | 1.833003 | 1.710854 | 1.655156 | 2.432237 | 1.23966  | 0.909491 | 0.817661 | 0.976753 | 0.891255 | 0.923725 | 2.201449 | 2.396814 | 1.003975 | 1.675271 | 1.117469 | 1.066762 | 0.999676  | 1.104456 |
| hydroxyproline                | 1.078331 | 0.94632  | 0.783068 | 0.716121 | 0.674938 | 0.869898 | 0.902635 | 1.051057 | 0.95393  | 0.935302 | 1.186997 | 0.829629 | 0.921436 | 0.850399 | 0.835665 | 0.775439 | 1.128299 | 1.028205 | 1.162871  | 0.925605 |
| hypotaurine                   | 1.007086 | 1.242331 | 1.651354 | 1.876521 | 1.192782 | 1.247729 | 1.736837 | 1.956898 | 1.958198 | 1.960027 | 1.136841 | 1.514211 | 0.773503 | 0.665926 | 1.18004  | 1.707079 | 1.269919 | 1.066496 | 2.030594  | 1.95399  |
| hypoxanthine                  | 1.005688 | 1.229899 | 1.220223 | 1.349723 | 1.148965 | 1.17076  | 1.467196 | 0.98237  | 0.921337 | 0.951281 | 0.899103 | 1.177971 | 1.11229  | 1.089725 | 1.037158 | 1.340115 | 0.995655 | 0.821781 | 1.05195   | 1.064756 |
| imazolelactic acid            | 1.12706  | 0.993927 | 1.065654 | 0.941779 | 0.97155  | 0.99481  | 0.936708 | 0.819767 | 0.887226 | 1.040983 | 0.872546 | 1.1182   | 0.885142 | 0.910289 | 0.91458  | 1.019293 | 0.941588 | 1.089788 | 1.03849   | 1.03849  |
| indole-3-acetic acid          | 0.850862 | 1.070261 | 0.875105 | 0.97105  | 1.085494 | 1.048087 | 1.071793 | 1.012799 | 0.943783 | 0.867274 | 0.885437 | 1.145149 | 1.023476 | 0.989828 | 1.163886 | 1.104583 | 0.622889 | 1.051047 | 0.730717  | 1.007317 |
| indole-3-propionate           | 0.660568 | 0.761317 | 0.920926 | 0.728927 | 0.935792 | 0.885229 | 0.980716 | 0.825185 | 0.9323   | 0.872627 | 0.864106 | 0.963638 | 0.768748 | 0.95264  | 0.934714 | 1.081039 | 0.983819 | 0.928407 | 1.150435  | 1.00877  |
| indoleacrylic acid            | 0.941565 | 0.827327 | 1.0813   | 0.848762 | 0.888894 | 0.816942 | 0.957906 | 1.063097 | 1.035431 | 0.949927 | 1.054959 | 0.827647 | 1.008564 | 0.886854 | 0.944145 | 0.767071 | 0.939    | 1.045119 | 0.874622  | 0.933846 |
| indoleacetic acid             | 1.03847  | 1.44453  | 0.941059 | 0.980761 | 1.034914 | 1.243966 | 1.118217 | 0.650166 | 1.182658 | 1.059887 | 0.979485 | 0.68183  | 0.780049 | 0.921337 | 1.007791 | 0.971878 | 0.822245 | 0.975568 | 0.90309   | 0.898733 |
| indolepyruvate                | 0.762463 | 0.806356 | 0.958482 | 0.896289 | 0.884564 | 0.948904 | 0.978645 | 0.966536 | 0.986163 | 1.069908 | 0.990296 | 1.006893 | 0.87455  | 1.0299   | 1.02932  | 0.82846  | 1.030957 | 0.939394 | 0.840306  | 1.050646 |
| indoxyl sulfate               | 0.800066 | 0.598292 | 0.893383 | 1.02078  | 0.867456 | 0.883665 | 0.884931 | 0.809672 | 0.893124 | 0.83511  | 0.912149 |          |          |          |          |          |          |          |           |          |

|                                                   |          |          |          |          |          |          |          |          |          |          |          |          |          |          |          |          |          |          |          |          |
|---------------------------------------------------|----------|----------|----------|----------|----------|----------|----------|----------|----------|----------|----------|----------|----------|----------|----------|----------|----------|----------|----------|----------|
| serotonin                                         | 1.438499 | 1.815351 | 1.050308 | 0.673482 | 0.684485 | 0.641184 | 1.046921 | 0.844257 | 0.8827   | 1.131054 | 1.006569 | 1.178122 | 0.93393  | 0.749666 | 0.72932  | 0.418309 | 0.825136 | 1.053584 | 0.857677 | 1.151937 |
| siatic acid                                       | 1.188478 | 0.94514  | 1.133093 | 0.851503 | 1.025126 | 1.097611 | 1.048882 | 0.85722  | 0.934252 | 1.043821 | 1.211275 | 0.860646 | 0.984404 | 0.804891 | 0.878245 | 1.058424 | 1.231138 | 1.096316 | 1.04718  | 0.913381 |
| S-methyl-5'-thioadenosine                         | 1.352101 | 1.188435 | 1.055616 | 1.452851 | 1.039613 | 1.321326 | 0.933115 | 0.785587 | 0.903689 | 0.977213 | 1.263531 | 1.351194 | 1.382655 | 1.180123 | 1.052943 | 1.110935 | 1.296280 | 0.877468 | 0.877468 | 0.811738 |
| sorbitol                                          | 0.8989   | 1.14772  | 1.066693 | 1.305884 | 1.144317 | 1.142252 | 1.652007 | 0.915609 | 1.348567 | 1.145087 | 0.978219 | 1.082035 | 0.983228 | 0.99866  | 1.051033 | 1.561746 | 0.988878 | 1.067668 | 1.118123 | 1.093308 |
| stearoil carnitine C18                            | 1.013133 | 1.034757 | 0.752526 | 0.932099 | 0.935044 | 1.25783  | 1.18306  | 1.210622 | 1.25382  | 0.994718 | 0.864961 | 1.015667 | 1.064302 | 1.066625 | 1.266451 | 1.291168 | 1.146725 | 1.156215 | 0.959016 |          |
| succinate                                         | 1.010065 | 1.176514 | 1.02187  | 1.109493 | 1.038294 | 0.958427 | 1.007887 | 0.957166 | 1.065948 | 1.093664 | 1.208695 | 1.130651 | 0.955025 | 1.055148 | 1.156783 | 1.115968 | 1.453593 | 1.478778 | 1.591042 | 1.62183  |
| synephrine                                        | 0.886795 | 1.017485 | 1.241371 | 1.537091 | 1.053446 | 1.433443 | 0.927312 | 1.328105 | 1.056058 | 1.623366 | 1.598057 | 1.823547 | 1.54027  | 24.87687 | 16.37474 | 4.847959 | 5.444876 | 2.283122 | 2.794008 |          |
| taurine                                           | 0.894715 | 1.019192 | 1.162768 | 1.543519 | 1.196706 | 1.328443 | 1.36911  | 1.037423 | 1.053462 | 1.06623  | 0.910784 | 1.027511 | 1.000984 | 1.028999 | 1.036367 | 1.588415 | 0.925793 | 0.792801 | 1.013028 | 0.988463 |
| tetraoerxocholic acid                             | 0.620346 | 1.286414 | 0.942777 | 0.963021 | 2.673326 | 2.434153 | 1.026387 | 0.935869 | 1.795311 | 1.443172 | 1.643558 | 0.716815 | 1.131596 | 1.152395 | 0.846392 | 1.129678 | 0.895208 | 1.098202 | 1.18345  | 0.928424 |
| tetraoerxocarnitine C14:2                         | 1.140904 | 1.165112 | 0.943608 | 1.000045 | 0.916471 | 2.349825 | 1.210443 | 1.867447 | 1.646866 | 1.413819 | 1.243878 | 1.020831 | 0.959862 | 1.052395 | 2.051999 | 1.257049 | 2.098743 | 1.859984 | 1.18345  | 1.451202 |
| tetraoerxocarnitine C18:1                         | 1.300977 | 1.202502 | 0.84741  | 1.429888 | 1.272178 | 1.727748 | 1.052253 | 1.183755 | 1.083501 | 0.693588 | 1.155561 | 1.27525  | 1.044142 | 1.204589 | 1.166471 | 1.576493 | 1.207934 | 1.345113 | 1.134664 | 1.114118 |
| threonine                                         | 0.847685 | 0.92373  | 1.090728 | 0.91249  | 1.048766 | 1.038979 | 1.024598 | 1.056164 | 0.959906 | 1.100493 | 0.893348 | 1.129724 | 0.981029 | 0.984195 | 1.021338 | 1.017735 | 0.930431 | 0.912798 | 0.913348 | 1.117707 |
| thymidine                                         | 1.166446 | 1.213341 | 1.759975 | 1.690854 | 1.200414 | 1.444078 | 1.228979 | 1.188633 | 1.918055 | 1.729377 | 1.103689 | 1.136678 | 0.940028 | 0.965733 | 1.214093 | 1.357688 | 1.080191 | 0.926624 | 1.096722 | 0.980877 |
| thymine                                           | 1.278807 | 1.396874 | 1.449895 | 1.516387 | 1.192133 | 1.359295 | 1.072223 | 1.226302 | 1.813658 | 1.610746 | 1.234932 | 0.957166 | 1.055812 | 0.890889 | 1.203526 | 1.251577 | 1.149444 | 1.175404 | 1.185887 | 1.16837  |
| tylgly carnitine or methylcrotonyl carnitine C5:1 | 1.008223 | 0.979449 | 0.846665 | 0.893788 | 0.707897 | 0.799624 | 0.788193 | 1.044847 | 0.886367 | 0.99325  | 1.081592 | 0.918907 | 0.967874 | 0.861743 | 0.740206 | 1.030722 | 0.926894 | 1.325556 | 1.143341 | 1.183916 |
| trans-Cinnamate                                   | 0.897858 | 1.191781 | 1.182553 | 1.165882 | 1.299014 | 1.315052 | 0.965911 | 1.074942 | 0.971766 | 1.12596  | 1.048805 | 1.08818  | 1.066455 | 1.001519 | 0.984749 | 0.886341 | 0.985201 | 1.050249 | 0.993794 | 0.979557 |
| trans-Hydroxycinnamic acid                        | 0.911138 | 0.979796 | 0.913029 | 0.847337 | 1.116277 | 1.160021 | 1.18926  | 1.234455 | 1.182586 | 1.30015  | 0.961585 | 1.037222 | 0.953622 | 0.970887 | 0.992462 | 1.03971  | 0.914323 | 0.92537  | 0.748072 | 0.896473 |
| triethanolamine                                   | 0.715244 | 0.819794 | 0.260311 | 1.060401 | 0.85842  | 0.689589 | 0.258494 | 0.413996 | 1.19312  | 0.932954 | 0.536992 | 0.867619 | 1.279681 | 1.215602 | 0.77065  | 1.398079 | 0.791553 | 0.646939 | 1.277098 | 0.926564 |
| tryptophan                                        | 0.57596  | 0.944895 | 1.07845  | 0.984934 | 1.034135 | 1.087809 | 1.020576 | 0.958855 | 0.945694 | 0.96352  | 0.84013  | 1.066277 | 1.088246 | 1.078461 | 1.07728  | 0.94466  | 0.939723 | 1.00525  | 0.95392  | 0.91707  |
| tyrosine                                          | 0.976272 | 0.890445 | 0.666178 | 0.684972 | 0.811957 | 0.781261 | 0.863771 | 0.784694 | 0.938458 | 1.03366  | 1.01301  | 0.852798 | 0.714776 | 0.655282 | 1.073106 | 0.944048 | 0.931634 | 1.010243 | 0.914672 | 1.180103 |
| tyrosine                                          | 0.853001 | 0.955109 | 1.256796 | 1.235014 | 1.124948 | 1.103931 | 0.99901  | 1.042432 | 1.110282 | 1.127788 | 0.900384 | 0.995346 | 1.088517 | 1.120643 | 1.038614 | 1.04851  | 0.946563 | 0.968382 | 0.847289 | 0.912782 |
| uracil                                            | 1.012125 | 0.981429 | 1.397272 | 1.963123 | 1.133822 | 1.271857 | 0.876703 | 0.566066 | 0.718643 | 0.665366 | 1.046722 | 1.291646 | 1.124122 | 1.353536 | 1.036955 | 1.03575  | 0.89929  | 0.963594 | 2.229653 | 1.908494 |
| ureidopropionic acid                              | 0.863772 | 1.813788 | 0.924441 | 1.075652 | 1.010811 | 1.029677 | 1.169893 | 1.271095 | 1.013499 | 1.160871 | 0.935378 | 1.09862  | 0.971822 | 0.950151 | 1.039742 | 1.191084 | 0.904283 | 0.684517 | 0.967264 | 0.912275 |
| uric acid                                         | 0.848468 | 0.994488 | 1.064177 | 0.91051  | 0.881986 | 0.829636 | 0.88348  | 0.766235 | 0.735938 | 0.948972 | 0.980881 | 1.262858 | 1.134715 | 1.103045 | 1.056629 | 1.11029  | 1.245845 | 1.261421 | 0.972905 | 1.095169 |
| uridine                                           | 1.33296  | 1.118519 | 1.400949 | 1.597743 | 1.399238 | 1.57042  | 1.463933 | 1.440274 | 1.155069 | 1.123523 | 0.883078 | 0.939578 | 1.2894   | 1.150266 | 1.103422 | 1.565386 | 1.097483 | 1.262087 | 1.254045 | 1.951639 |
| valine                                            | 0.941751 | 0.989975 | 1.029791 | 0.946009 | 1.072707 | 1.015439 | 1.062349 | 1.039664 | 0.960222 | 1.039223 | 0.954167 | 0.974368 | 1.01734  | 0.999992 | 0.99922  | 0.969922 | 0.93015  | 0.988382 | 0.879247 | 0.915952 |
| xanthine                                          | 0.641451 | 0.763445 | 0.881687 | 0.992649 | 1.303005 | 1.390599 | 0.999669 | 0.997689 | 0.748259 | 0.807317 | 0.834541 | 0.894329 | 1.116181 | 1.050928 | 1.234477 | 1.097671 | 1.186267 | 1.029139 | 1.10069  |          |
| xanthosine                                        | 1.068941 | 1.584363 | 1.305043 | 1.205246 | 1.210524 | 1.645511 | 1.505633 | 1.235964 | 1.776932 | 1.25042  | 1.04089  | 1.238219 | 1.226186 | 1.290353 | 1.153632 | 1.390475 | 1.385049 | 1.165863 | 1.911252 | 1.310698 |
| metabolites                                       |          | spleen   | head     |

| metabolite                  | leg      | heart    | heart    | heart    | heart    | heart    | heart | heart | heart | heart | heart |
|-----------------------------|----------|----------|----------|----------|----------|----------|----------|----------|----------|----------|----------|----------|----------|----------|----------|-------|-------|-------|-------|-------|
| 1-methyladenosine           | 0.974122 | 0.726276 | 0.977609 | 0.755373 | 1.025661 | 1.017612 | 1.11455  | 0.978717 | 1.049244 | 1.132171 | 0.973704 | 1.02545  | 0.984306 | 1.357595 | 0.983569 |       |       |       |       |       |
| 1-methyl-histidine          | 0.924131 | 1.038675 | 1.056255 | 0.871528 | 0.96201  | 1.06206  | 0.995706 | 0.866088 | 1.0065   | 0.959823 | 1.310487 | 1.022837 | 1.124737 | 0.947597 | 0.924241 |       |       |       |       |       |
| 3-dihydroxybenzoic acid     | 0.959609 | 1.126239 | 1.009444 | 0.978277 | 1.042424 | 1.069604 | 1.050175 | 1.066319 | 0.964623 | 0.977586 | 0.938451 | 0.960556 | 0.947128 | 0.659281 | 1.012635 |       |       |       |       |       |
| 3-Pyridinedicarboxylic acid | 0.931302 | 1.08264  | 0.943575 | 0.950068 | 1.089574 | 1.005741 | 0.864645 | 1.071399 | 0.983302 | 1.003367 | 1.063383 | 1.03102  | 0.904258 | 0.864488 | 0.798927 |       |       |       |       |       |
| 2-amino-3-hydroxybutyrate   | 1.091251 | 0.974663 | 1.066766 | 0.7214   | 0.983174 | 1.016507 | 1.054065 | 1.051506 | 0.940578 | 0.851761 | 0.951358 | 0.977133 | 0.992067 | 0.983302 | 1.000311 |       |       |       |       |       |
| 2-dehydrogluconate          | 0.873304 | 1.127711 | 1.042617 | 1.042911 | 0.963021 | 0.957494 | 0.888599 | 0.935058 | 0.871386 | 0.878476 | 1.096507 | 1.04136  | 1.071104 | 1.252438 | 1.104272 |       |       |       |       |       |
| 2-Deoxy-D-ribose            | 1.03521  | 1.027771 | 0.938131 | 1.131783 | 0.915214 | 0.903636 | 0.867774 | 0.89806  | 0.920729 | 1.056757 | 1.088547 | 0.983874 | 1.024759 | 0.980095 | 0.829385 |       |       |       |       |       |
| 2-hydroxy Hippuric acid     | 0.819389 | 1.084805 | 1.060521 | 0.85727  | 0.926512 | 1.032927 | 0.819909 | 1.015686 | 1.09751  | 0.863609 | 1.007232 | 1.034592 | 1.048322 | 1.077252 | 1.399086 |       |       |       |       |       |
| 2-hydroxybutyrate           | 1.029704 | 0.969449 | 0.909579 | 1.045889 | 0.939931 | 1.12673  | 0.842627 | 0.935512 | 1.025343 | 0.940234 | 0.921718 | 0.985284 | 0.952988 | 0.601533 | 0.968829 |       |       |       |       |       |
| 2-hydroxy-isocaproate       | 1.354877 | 1.356762 | 1.829171 | 2.208976 | 1.396044 | 1.679485 | 1.712675 | 1.558175 | 1.971335 | 1.813064 | 0.668058 | 0.993608 | 0.994413 | 0.81808  | 0.96343  |       |       |       |       |       |
| 2-hydroxy-isovalerate       | 1.363753 | 1.37246  | 1.608397 | 1.919405 | 1.305453 | 1.418477 | 1.268642 | 1.365449 | 1.839014 | 1.474329 | 1.035266 | 0.954381 | 1.002165 | 0.854483 | 0.909456 |       |       |       |       |       |
| 2-Hydroxyoctanoic acid      | 1.08082  | 1.005225 | 1.497884 | 1.634115 | 1.275544 | 1.440624 | 1.396521 | 1.523395 | 1.209966 | 1.217162 | 1.267984 | 1.167775 | 0.91911  | 1.05422  | 1.125712 |       |       |       |       |       |
| 2-Isopropylmalic acid       | 0.992001 | 0.875024 | 0.896301 | 0.977687 | 1.178469 | 1.081231 | 0.752423 | 0.982393 | 1.019586 | 1.009511 | 0.990901 | 1.032355 | 0.936586 | 0.752558 | 0.799588 |       |       |       |       |       |
| 2-Ketobutyric acid          | 1.232176 | 1.092084 | 0.996163 | 1.078284 | 0.965542 | 1.212335 | 0.834363 | 0.928523 | 0.929047 | 0.848002 | 0.896298 | 1.047385 | 0.952629 | 1.007228 | 1.137286 |       |       |       |       |       |
| 2-Keto-isovalerate          | 1.275823 | 1.157944 | 1.192678 | 1.150992 | 1.102582 | 1.071586 | 1.214001 | 1.248214 | 1.179251 | 1.06532  | 0.980399 | 0.991782 | 1.047401 | 1.190307 | 0.901295 |       |       |       |       |       |
| 2-Keto-succinate            | 1.315008 | 1.444748 | 1.34823  | 1.166039 | 1.132031 | 1.076018 | 0.924932 | 1.116002 | 1.071388 | 1.099317 | 0.974301 | 0.979396 | 1.029121 | 1.03368  | 0.982798 |       |       |       |       |       |
| 2-Methylbutyrylglycine      | 0.888049 | 0.951424 | 1.017489 | 1.118448 | 0.997319 | 1.151281 | 1.090872 | 1.041666 | 0.957922 | 1.033267 | 0.900625 | 1.255497 | 1.004742 | 1.104098 | 1.354976 |       |       |       |       |       |
| 2-methylpyruvic acid        | 0.996522 | 1.046911 | 0.95012  | 1.147713 | 0.934003 | 0.91968  | 1.174702 | 0.928151 | 0.958899 | 0.863302 | 1.54045  | 0.95373  | 1.302164 | 1.026954 | 1.102434 |       |       |       |       |       |
| 2-Oxoadipic acid            | 0.897349 | 1.262566 | 1.25491  | 1.075354 | 0.888433 | 0.999003 | 0.84201  | 0.764384 | 0.679852 | 0.897531 | 1.143905 | 1.066749 | 0.871113 | 0.903861 | 0.966215 |       |       |       |       |       |
| 2-Phenylpropionic acid      | 0.623906 | 0.706981 | 0.926073 | 0.810448 | 0.955889 | 1.025    |          |          |          |          |          |          |          |          |          |       |       |       |       |       |



|                               |          |          |          |          |          |          |          |          |           |          |          |          |           |          |          |
|-------------------------------|----------|----------|----------|----------|----------|----------|----------|----------|-----------|----------|----------|----------|-----------|----------|----------|
| C20:1                         | 1.528608 | 2.186591 | 1.473103 | 1.459308 | 0.984097 | 0.916988 | 1.012383 | 0.9997   | 1.160501  | 1.111852 | 0.785707 | 0.513594 | 1.010581  | 0.564436 | 0.613377 |
| C20:2                         | 1.539914 | 2.214466 | 1.580603 | 1.52251  | 0.990456 | 1.014143 | 1.146214 | 1.021323 | 1.023641  | 1.107772 | 0.813841 | 0.608222 | 1.081386  | 0.662511 | 0.743461 |
| C20:3                         | 1.257225 | 2.159403 | 1.464028 | 1.687935 | 1.566839 | 1.429213 | 1.2031   | 1.20471  | 1.124527  | 1.301744 | 1.025497 | 0.783961 | 1.753111  | 1.566679 | 1.781788 |
| C20:4                         | 1.033361 | 1.025067 | 0.907909 | 0.606034 | 0.564364 | 0.734624 | 0.87083  | 0.537571 | 0.566752  | 0.687699 | 0.916708 | 0.850297 | 0.794114  | 1.041702 | 1.086272 |
| C22:0                         | 1.293189 | 1.688789 | 1.007318 | 1.065154 | 0.848543 | 0.931206 | 0.79021  | 1.045427 | 1.253803  | 0.911066 | 0.971579 | 0.923852 | 0.912468  | 0.758627 | 0.873997 |
| C22:1                         | 1.292261 | 1.518341 | 1.074577 | 0.914292 | 0.970628 | 0.931225 | 1.132545 | 0.969674 | 1.012302  | 1.146125 | 0.853138 | 0.690366 | 1.011697  | 0.566267 | 0.908802 |
| C22:2                         | 1.401439 | 1.781768 | 1.399485 | 1.262117 | 0.930676 | 1.014364 | 1.187127 | 0.972693 | 0.842709  | 0.938519 | 0.815334 | 0.696666 | 1.081423  | 0.738409 | 0.825288 |
| C22:3                         | 1.735758 | 1.886273 | 1.611248 | 1.684662 | 1.021115 | 0.984108 | 1.150694 | 1.169813 | 0.963419  | 1.05699  | 0.86448  | 0.650967 | 0.979414  | 0.775563 | 0.84281  |
| C22:4                         | 1.567401 | 2.159552 | 2.190776 | 2.147598 | 1.170275 | 1.216421 | 1.357823 | 1.254714 | 1.019343  | 1.093757 | 1.102162 | 0.793241 | 1.171041  | 0.9599   | 0.969201 |
| C22:5                         | 1.640737 | 2.210421 | 2.259009 | 2.405211 | 1.343365 | 1.272767 | 1.298837 | 1.351699 | 1.024704  | 0.99887  | 1.072673 | 0.904865 | 1.210588  | 1.044616 | 1.205774 |
| C22:6                         | 0.906966 | 1.138427 | 1.16293  | 0.956249 | 0.993145 | 0.871688 | 0.982327 | 0.76114  | 0.826759  | 0.905803 | 1.088376 | 0.991252 | 0.938613  | 1.088509 | 1.492541 |
| C23:0                         | 1.004172 | 1.447611 | 0.998993 | 0.967989 | 0.847852 | 0.813722 | 1.0801   | 0.941861 | 1.41184   | 1.003136 | 0.870219 | 0.825756 | 1.017396  | 1.508824 | 1.53815  |
| C23:1                         | 0.908945 | 0.934939 | 0.992884 | 0.76731  | 0.747814 | 0.72192  | 0.993945 | 0.556678 | 0.833656  | 0.648927 | 0.958687 | 0.932094 | 0.847826  | 0.893665 | 0.971152 |
| C24:0                         | 1.01613  | 1.29574  | 0.994525 | 0.942896 | 0.85255  | 1.009867 | 1.061016 | 0.852316 | 1.278735  | 1.014756 | 0.89639  | 0.775088 | 0.903969  | 0.828478 | 1.007557 |
| C24:1                         | 0.985207 | 1.255277 | 0.858926 | 0.858259 | 0.868815 | 0.957841 | 1.10614  | 0.875132 | 0.77836   | 1.040018 | 0.880372 | 0.825688 | 0.978374  | 0.71428  | 1.007571 |
| C24:2                         | 1.07417  | 1.209449 | 0.688754 | 1.000778 | 0.904713 | 1.068783 | 1.033949 | 1.039471 | 0.886773  | 0.994206 | 0.916588 | 0.704933 | 1.044031  | 0.71426  | 0.950885 |
| C24:3                         | 1.132029 | 1.460461 | 1.014488 | 1.04873  | 0.932094 | 0.927429 | 1.004899 | 1.009398 | 0.995789  | 0.8605   | 0.890024 | 0.72879  | 0.916403  | 0.82766  | 0.99989  |
| C24:4                         | 1.297993 | 1.965624 | 1.652242 | 1.606549 | 0.839745 | 0.91267  | 1.136753 | 1.076107 | 0.853188  | 0.978374 | 0.936432 | 0.775993 | 0.971943  | 1.152155 | 1.248116 |
| C24:5                         | 0.697188 | 0.955538 | 0.632788 | 0.764458 | 1.066245 | 1.075736 | 0.937832 | 0.944945 | 0.950924  | 0.96919  | 0.958812 | 1.083557 | 1.124471  | 0.978622 | 0.780704 |
| caprylic glycolic             | 1.029621 | 0.844237 | 0.935086 | 1.112091 | 0.98631  | 1.065341 | 0.928571 | 0.973075 | 0.953567  | 1.127725 | 0.972573 | 1.002258 | 1.02011   | 1.141713 | 1.036076 |
| carbamoyl phosphate           | 0.947703 | 0.844171 | 0.970209 | 0.656665 | 0.890278 | 0.871315 | 1.061796 | 1.059274 | 0.891824  | 0.934567 | 1.143375 | 1.025907 | 1.030655  | 0.831796 | 0.99517  |
| carnitine                     | 0.939923 | 1.046446 | 1.300936 | 1.204418 | 1.075667 | 1.12041  | 1.049248 | 0.99448  | 1.192228  | 1.225944 | 1.065207 | 0.995655 | 1.008216  | 1.137143 | 1.01153  |
| carnosine                     | 0.903788 | 0.885968 | 0.982934 | 1.017145 | 1.08967  | 1.064786 | 1.073744 | 1.05963  | 0.845343  | 0.90859  | 0.93642  | 1.093837 | 0.933277  | 0.633014 | 1.209159 |
| catchol sulfate               | 0.930897 | 0.858354 | 1.04717  | 0.978608 | 1.0188   | 1.09942  | 1.010046 | 0.935217 | 0.905861  | 0.867117 | 1.000343 | 1.120354 | 0.940817  | 0.954167 | 1.01773  |
| cholesterol sulfate           | 0.941516 | 1.032618 | 1.127686 | 1.187597 | 1.044951 | 1.270752 | 1.068854 | 1.086909 | 1.13281   | 1.093133 | 0.990671 | 1.004438 | 1.128076  | 1.380584 | 0.874713 |
| cinamoylglycine               | 1.396287 | 1.589053 | 1.526619 | 1.484583 | 1.154242 | 1.220339 | 1.251516 | 1.387118 | 1.54812   | 1.542452 | 1.02502  | 0.989408 | 0.971969  | 1.906352 | 0.6041   |
| citrilmalic acid              | 1.570562 | 1.272852 | 1.145997 | 1.35349  | 1.213002 | 1.163514 | 1.303818 | 1.308429 | 1.333454  | 1.055356 | 1.221322 | 1.016112 | 1.099173  | 1.431421 | 1.103592 |
| citrate                       | 0.991332 | 1.014166 | 0.970296 | 0.949228 | 0.960511 | 0.925266 | 0.913873 | 0.952166 | 0.942267  | 0.940158 | 0.964831 | 1.020333 | 0.974772  | 0.981967 | 1.03106  |
| citrulline                    | 0.983935 | 0.961675 | 0.685223 | 0.726983 | 0.854851 | 0.88533  | 0.835549 | 0.941601 | 0.661081  | 0.675597 | 1.041317 | 1.017085 | 1.03986   | 1.126719 | 1.025444 |
| creatine                      | 1.141278 | 1.211122 | 1.252188 | 1.272616 | 1.172296 | 1.278705 | 1.072003 | 1.022443 | 1.223225  | 1.227963 | 0.975875 | 1.026487 | 0.987538  | 1.091669 | 1.042494 |
| creatinine                    | 0.913037 | 0.926126 | 0.944659 | 0.818803 | 1.00095  | 1.255991 | 1.016976 | 1.044305 | 0.820183  | 1.064292 | 1.04472  | 1.197171 | 1.047058  | 0.713715 | 1.159216 |
| crocol                        | 0.919129 | 0.873882 | 0.939495 | 0.978819 | 0.994325 | 0.949936 | 1.046908 | 1.095893 | 0.920782  | 0.941421 | 0.972903 | 1.002412 | 0.962074  | 0.692514 | 1.139154 |
| crocol sulfate                | 1.138805 | 0.94834  | 1.16227  | 0.925957 | 1.051789 | 1.193267 | 1.132298 | 1.189785 | 1.027712  | 1.037596 | 1.007648 | 0.075172 | 1.182822  | 1.179805 | 1.201036 |
| cytidine                      | 0.845928 | 0.906174 | 0.891655 | 1.072658 | 1.091094 | 1.10249  | 1.022728 | 0.965997 | 1.018315  | 1.146521 | 1.001326 | 1.31958  | 1.006974  | 0.784885 | 1.305154 |
| cytidine                      | 1.160602 | 1.02869  | 1.092096 | 1.106525 | 0.934312 | 0.997298 | 0.971661 | 0.96556  | 0.960321  | 1.009856 | 1.042262 | 0.959565 | 0.998256  | 1.082273 | 0.861537 |
| D-2-Aminobutyric acid         | 1.384958 | 1.410785 | 1.852734 | 2.344851 | 1.292633 | 0.821628 | 1.638812 | 1.177814 | 2.838505  | 1.892234 | 1.147053 | 1.002252 | 1.434899  | 1.102266 | 0.717426 |
| decanoyl carnitine C10        | 1.353855 | 0.886929 | 1.522921 | 0.986592 | 0.864734 | 0.96349  | 1.224246 | 1.386647 | 1.162253  | 1.344798 | 0.800852 | 1.091165 | 1.187944  | 1.278848 | 0.847372 |
| decanoyl carnitine C10:1      | 0.986499 | 1.284842 | 1.093599 | 0.955192 | 1.110271 | 0.84559  | 1.196603 | 1.001025 | 0.793852  | 0.917122 | 1.298504 | 1.166076 | 0.761213  | 0.977355 | 0.758776 |
| dehydroascorbic acid          | 1.178476 | 0.822492 | 0.974872 | 0.825937 | 0.906101 | 0.924216 | 0.993795 | 1.050771 | 0.939989  | 0.989769 | 0.931881 | 1.015358 | 1.007493  | 1.141505 | 1.168683 |
| dehydrocarnitine              | 0.676699 | 0.797165 | 1.059415 | 1.033944 | 1.104158 | 1.015697 | 1.170869 | 0.953781 | 1.142158  | 1.027226 | 1.038773 | 1.087699 | 0.901285  | 1.652328 | 1.309693 |
| deoxycholic acid              | 1.121303 | 0.93806  | 0.795813 | 0.987477 | 1.10015  | 0.99712  | 0.835156 | 0.97123  | 0.83121   | 0.990823 | 0.91144  | 1.256103 | 0.909621  | 0.671312 | 1.600771 |
| deoxyinosine                  | 0.946499 | 1.212238 | 0.949021 | 1.049603 | 0.986126 | 0.877608 | 1.12758  | 0.928688 | 0.828485  | 0.925789 | 1.0604   | 1.035149 | 0.91178   | 1.470711 | 1.543775 |
| deoxynadine                   | 1.105619 | 1.202169 | 1.200837 | 1.258704 | 1.191869 | 1.298438 | 1.135912 | 1.263035 | 1.283132  | 1.15782  | 1.02403  | 1.017414 | 1.025296  | 1.313723 | 1.202638 |
| deoxyuridine                  | 0.971753 | 1.385002 | 0.957042 | 0.959544 | 0.804403 | 0.73647  | 0.711373 | 0.809625 | 0.623633  | 0.650444 | 0.995506 | 1.146216 | 1.044023  | 0.534132 | 0.56144  |
| D-Galactonic acid             | 0.971753 | 0.81425  | 0.957042 | 0.959544 | 0.804403 | 0.73647  | 0.711373 | 0.809625 | 0.623633  | 0.650444 | 0.995506 | 1.146216 | 1.044023  | 0.534132 | 0.56144  |
| D-glucanate                   | 0.938906 | 0.978259 | 0.927777 | 1.163476 | 1.03858  | 1.034222 | 1.640785 | 1.069834 | 1.164882  | 0.92323  | 1.119592 | 1.060192 | 0.941944  | 0.81586  | 0.705349 |
| diaminopimelic acid           | 1.083066 | 0.885692 | 0.868393 | 1.11058  | 1.114818 | 1.019408 | 0.875281 | 0.954071 | 0.862911  | 1.016021 | 1.101108 | 0.884999 | 0.89261   | 0.891532 | 0.93261  |
| dihydroauracil                | 0.92341  | 1.001791 | 1.009444 | 0.978277 | 1.042424 | 1.069604 | 1.050175 | 1.066319 | 0.964623  | 0.977586 | 0.938451 | 0.960556 | 0.947128  | 0.780614 | 0.656079 |
| dihydroxybenzoic acid         | 1.00027  | 1.038853 | 1.092096 | 1.106525 | 0.934312 | 0.997298 | 0.934052 | 0.96556  | 1.07307   | 1.113343 | 1.042262 | 0.959565 | 0.998256  | 1.000518 | 0.994426 |
| dimethylglycine               | 0.79663  | 0.557776 | 0.612208 | 0.621324 | 0.937389 | 1.076405 | 0.521676 | 0.362125 | 1.025112  | 0.777221 | 1.268649 | 1.21441  | 1.121662  | 1.105184 | 0.74698  |
| DL-3,4-Dihydroxymandelic acid | 1.118685 | 0.948743 | 0.946947 | 0.93691  | 0.549112 | 0.893555 | 0.838723 | 0.817277 | 0.883797  | 0.801956 | 1.118542 | 1.304513 | 0.961301  | 1.159293 | 0.979973 |
| dodecanoyl carnitine C12:1    | 2.020544 | 2.033189 | 2.213625 | 1.387051 | 1.433548 | 0.704605 | 0.941266 | 1.436665 | 1.701203  | 1.354071 | 0.975249 | 0.825716 | 0.959517  | 0.748848 | 0.792183 |
| D-Phenylacetic acid           | 1.338531 | 1.205224 | 1.450389 | 0.951506 | 1.075688 | 1.065084 | 0.941616 | 0.687801 | 1.102283  | 1.099588 | 1.061013 | 0.988733 | 0.928217  | 1.045375 | 1.017872 |
| epinephrine sulfate           | 0.863643 | 0.905885 | 0.976393 | 1.125768 | 0.776479 | 1.299983 | 1.12895  | 0.989832 | 1.113857  | 0.718738 | 0.949212 | 1.123744 | 1.224872  | 0.869879 | 0.93189  |
| not measu                     | 0.802181 | 0.743807 | 1.155887 | 0.746907 | 1.453973 | 1.194163 | 0.693515 | 0.917004 | not measu | 2.05908  | 0.45376  | 0.552865 | not measu | 1.034068 |          |
| fumarate                      | 1.506894 | 1.801983 | 1.965329 | 1.926792 | 1.198374 | 1.185246 | 1.31807  | 1.158607 | 1.671749  | 1.306414 | 1.055642 | 1.046414 | 1.077114  | 1.240819 | 1.060592 |
| galacturonic acid             | 0.873304 | 1.128711 | 1.042617 | 1.042911 | 0.963021 | 0.957494 | 0.888593 | 0.935098 | 0.871386  | 0.878476 | 1.096507 | 1.04136  | 1.071104  | 1.742434 | 1.955321 |
| gamma-butyrolactone           | 1.1101   | 1.000097 | 1.461146 | 1.016836 | 1.032789 | 0.951407 | 1.176666 | 1.142692 | 1.207455  | 1.107693 | 1.028678 | 1.024385 | 1.032422  | 0.930532 | 0.962225 |
| glucuronolactone              | 1.019551 | 0.887672 | 0.3965   | 0.235394 | 0.314887 | 0.213289 | 0.937928 | 0.892398 | 0.75888   | 0.25932  | 1.109364 | 0.877256 | 1.12895   | 0.642342 | 0.543877 |
| glucosamine                   | 1.123774 | 0.996275 | 1.089922 | 0.937304 | 0.978371 | 0.860729 | 0.989262 | 1.       |           |          |          |          |           |          |          |

|                               |          |          |          |          |          |          |          |          |          |           |           |          |          |          |          |
|-------------------------------|----------|----------|----------|----------|----------|----------|----------|----------|----------|-----------|-----------|----------|----------|----------|----------|
| N,N-dimethylarginine          | 1.061136 | 1.048758 | 1.156738 | 1.005061 | 1.118631 | 0.897324 | 0.854832 | 1.054594 | 1.008285 | 0.951924  | 1.361751  | 0.918248 | 1.088329 | 1.059658 | 1.057779 |
| N6-N6-Trimethyllysine         | 1.077483 | 0.80723  | 1.061648 | 0.887733 | 0.944613 | 0.893953 | 1.171821 | 1.158126 | 1.190257 | 1.083515  | 1.050454  | 0.993162 | 0.989782 | 1.426874 | 1.047127 |
| N-acetyl-alanine              | 0.997416 | 0.893049 | 1.129509 | 0.869777 | 1.002144 | 1.024816 | 1.033313 | 0.902463 | 0.888399 | 0.879486  | 0.995949  | 1.144523 | 1.027864 | 1.038718 | 0.977251 |
| N-acetyl-arginine             | 0.943016 | 1.030758 | 0.966221 | 1.028169 | 0.993567 | 0.957565 | 0.867009 | 1.023361 | 0.910411 | 0.954652  | 1.022521  | 0.988331 | 0.991616 | 1.071345 | 0.892683 |
| N-acetyl-asparagine           | 1.022269 | 1.265172 | 1.111185 | 1.196158 | 1.145954 | 1.002535 | 1.149462 | 1.272536 | 1.029314 | 1.092461  | 1.017931  | 1.058816 | 1.010535 | 1.28797  | 1.074322 |
| N-acetyl-aspartate            | 1.043702 | 0.78193  | 0.905476 | 0.679415 | 0.584421 | 0.758267 | 0.938593 | 1.036955 | 0.724945 | 0.667589  | 0.957799  | 1.092299 | 0.942461 | 1.112183 | 0.987836 |
| N-acetyl-glutamate            | 1.083601 | 1.261715 | 0.947645 | 1.022416 | 1.00771  | 0.918401 | 0.826022 | 0.927981 | 0.914298 | 0.897314  | 0.976116  | 1.072536 | 1.061618 | 1.10949  | 1.302944 |
| N-acetyl-glycine              | 0.956111 | 1.052103 | 0.89747  | 0.898657 | 0.915113 | 0.941268 | 0.863238 | 0.882879 | 0.939669 | 1.065444  | 1.015252  | 1.010925 | 0.997256 | 0.957793 | 0.990995 |
| N-acetyl-histidine            | 1.000005 | 0.761354 | 0.908909 | 0.671111 | 0.643667 | 0.568006 | 1.135528 | 0.950308 | 0.991576 | 0.905023  | 1.077027  | 1.052895 | 1.025005 | 1.445878 | 0.976981 |
| N-acetyl-L-ornithine          | 0.967147 | 0.979726 | 1.056946 | 1.039278 | 1.004942 | 0.99637  | 1.026337 | 0.995307 | 1.030649 | 0.943763  | 0.949044  | 0.99615  | 0.996711 | 0.863419 | 1.029183 |
| N-acetyl-threonine            | 0.89411  | 0.668623 | 0.873694 | 0.658304 | 0.800339 | 0.67014  | 0.935393 | 0.981708 | 0.605666 | 0.903378  | 0.980269  | 1.136544 | 1.042106 | 1.091176 | 0.982133 |
| N-acetyl-tryptophan           | 0.931132 | 0.89175  | 1.020512 | 0.99995  | 1.004612 | 1.126202 | 1.010533 | 0.684428 | 0.588859 | 0.71437   | 0.984132  | 1.493753 | 1.078472 | 0.825982 | 0.918745 |
| N-acetyl-tyrosine             | 0.796634 | 0.954232 | 0.971916 | 1.119427 | 0.936968 | 1.186789 | 1.24922  | 0.877448 | 0.857918 | 0.76248   | 0.940111  | 1.026299 | 1.029878 | 0.648996 | 0.618696 |
| N-Butyrylglycine              | 0.982256 | 0.775717 | 0.930312 | 0.643572 | 0.785294 | 0.643395 | 1.212622 | 1.069456 | 1.084389 | 0.891968  | 1.185973  | 0.930352 | 1.020825 | 1.368636 | 1.229742 |
| N-Carbamoylsarcosine          | 1.154286 | 0.959548 | 1.045827 | 0.700925 | 0.960257 | 1.047952 | 0.968345 | 0.997986 | 0.95584  | 0.926368  | 0.991923  | 0.971991 | 1.031786 | 1.060921 | 0.757568 |
| N-Formyl-L-methionine         | 1.117568 | 0.908039 | 1.08549  | 1.430929 | 1.143230 | 1.158692 | 1.123068 | 0.750649 | 1.269299 | 1.068303  | 0.943818  | 1.144465 | 0.979069 | 0.951027 | 0.78615  |
| nicotinamide                  | 1.003466 | 0.900374 | 0.849256 | 0.598346 | 0.921619 | 0.837225 | 0.945458 | 0.801013 | 0.507551 | 0.66565   | 0.902823  | 0.996354 | 1.000144 | 0.772946 | 0.96321  |
| N-Octanoylglycine             | 0.697188 | 0.981592 | 0.632788 | 0.764458 | 0.664458 | 0.664458 | 0.978117 | 0.944945 | 0.950924 | 0.877815  | 0.958812  | 1.021608 | 1.124471 | 0.978622 | 1.348925 |
| N-Tyglycine                   | 0.967819 | 1.042126 | 1.0097   | 1.14079  | 1.012858 | 1.07282  | 0.977397 | 0.762185 | 1.21528  | 1.165423  | 0.986273  | 1.083557 | 1.016146 | 1.086479 | 1.307118 |
| octanoyl carnitine C8         | 1.318087 | 1.168541 | 1.755704 | 1.682912 | 0.9524   | 1.19223  | 1.408233 | 0.978007 | 2.370728 | 1.431614  | 0.956596  | 0.958974 | 0.863437 | 1.130782 | 0.841054 |
| oleyl carnitine C18:1         | 1.3581   | 1.126361 | 1.294163 | 1.438811 | 1.269682 | 1.233235 | 1.219214 | 1.338732 | 1.776977 | 1.361619  | 0.935614  | 0.900856 | 0.988886 | 1.308035 | 0.758693 |
| O-Phosphorylthalamine         | 0.652726 | 0.549611 | 0.75762  | 0.678153 | 0.587081 | 0.918207 | 1.071391 | 0.878722 | 0.755697 | 0.614445  | 1.021178  | 1.015961 | 1.146172 | 1.340748 | 1.513829 |
| ornithine                     | 0.991677 | 0.949117 | 0.946039 | 0.944425 | 0.95929  | 0.917423 | 0.916419 | 0.985418 | 0.940408 | 0.863334  | 0.968535  | 1.011354 | 0.99093  | 1.065238 | 1.125112 |
| palmitoyl carnitine C16       | 1.127856 | 1.138214 | 1.075504 | 1.109733 | 1.228078 | 1.190621 | 1.224249 | 1.128921 | 1.401998 | 1.173211  | 0.895286  | 1.001232 | 0.967726 | 1.060574 | 0.878797 |
| p-aminobenzoate               | 0.934711 | 0.616494 | 0.879915 | 1.047849 | 1.292433 | 0.99283  | 1.051757 | 1.040854 | 1.223038 | 1.022492  | 1.234106  | 1.271108 | 0.957429 | 1.143241 | 1.268864 |
| pantothenate                  | 1.013075 | 1.079062 | 0.959267 | 0.965519 | 0.91381  | 0.913631 | 0.902702 | 1.040007 | 0.861297 | 0.957943  | 1.070718  | 1.055941 | 1.054568 | 0.888663 | 0.960802 |
| phenol                        | 1.183734 | 0.910863 | 0.893094 | 1.017282 | 1.006344 | 1.033116 | 0.955642 | 0.994532 | 0.949905 | 1.060842  | 0.807774  | 1.006866 | 0.937694 | 0.915582 | 1.008336 |
| phenol sulphate               | 0.95626  | 1.030282 | 0.986292 | 1.041579 | 1.02616  | 1.001207 | 1.077158 | 1.124784 | 1.061124 | 1.091298  | 0.881337  | 0.998768 | 0.970241 | 1.073082 | 1.003056 |
| phenylacetic acid             | 0.835162 | 0.867372 | 0.732215 | 0.959133 | 1.10279  | 1.018017 | 0.855487 | 1.406275 | 1.06728  | 1.406003  | 1.031167  | 1.155489 | 0.92788  | 1.103488 | 0.615108 |
| phenylalanyl-glycine          | 0.965546 | 0.895336 | 1.003948 | 0.698218 | 1.034522 | 0.926785 | 0.898075 | 0.932859 | 1.03082  | 0.864254  | 0.875423  | 1.117686 | 1.05002  | 1.274143 | 0.79334  |
| phenylalanine                 | 1.05556  | 1.04004  | 0.861796 | 0.940472 | 1.06952  | 1.069669 | 0.938465 | 1.008178 | 0.957249 | 0.993237  | 1.040027  | 0.966485 | 0.982939 | 1.207037 | 1.030008 |
| phenylpropionyl-glycine       | 0.941689 | 1.04077  | 0.789559 | 0.818607 | 1.011987 | 1.214802 | 1.000687 | 1.010396 | 0.711588 | 0.820026  | 1.057329  | 0.977529 | 1.263526 | 0.99715  | 0.916504 |
| phenylpyruvate                | 1.172785 | 0.975187 | 0.702482 | 0.604307 | 0.860547 | 0.895621 | 1.150851 | 1.124088 | 0.829055 | 0.840305  | 1.003496  | 1.047891 | 1.138748 | 1.247927 | 0.892779 |
| p-hydroxybenzoate             | 0.93927  | 1.094402 | 1.007123 | 0.993531 | 0.993359 | 0.995241 | 0.922255 | 1.078337 | 0.927896 | 1.072276  | 1.009517  | 0.905158 | 0.947032 | 0.904874 | 1.126101 |
| picolinic acid                | 1.054808 | 1.019394 | 0.974563 | 1.021831 | 1.045205 | 1.030352 | 0.955121 | 1.025053 | 1.059908 | 1.067555  | 0.994342  | 0.930361 | 0.98003  | 0.968415 | 1.026294 |
| proline                       | 0.985392 | 1.030164 | 0.984596 | 0.984433 | 1.003883 | 1.037626 | 0.901561 | 0.979472 | 0.910024 | 0.91382   | 0.966874  | 0.964555 | 0.997519 | 0.809934 | 0.956411 |
| proline betaine               | 1.107869 | 0.95984  | 0.977455 | 1.089212 | 1.042097 | 0.942854 | 1.036274 | 0.945551 | 1.021879 | 1.013635  | 0.928368  | 1.118837 | 1.000143 | 0.955308 | 1.041414 |
| propionate                    | 0.452817 | 0.443191 | 0.774856 | 0.417833 | 0.547526 | 0.73255  | 0.63728  | 0.494143 | 0.495171 | not measu | not measu | 1.118837 | 1.198929 | 0.949654 | 0.466548 |
| propionyl carnitine C3        | 0.803926 | 1.061774 | 0.581525 | 0.450974 | 0.83931  | 0.828499 | 0.930466 | 0.775165 | 0.671791 | 0.6518    | 1.002077  | 1.004774 | 1.050888 | 1.030201 | 1.099308 |
| propionyl-glycine             | 0.865543 | 0.865489 | 0.785297 | 0.86536  | 0.89531  | 0.966294 | 0.875035 | 0.921026 | 0.900283 | 0.927144  | 0.990882  | 1.107744 | 0.940198 | 0.834647 | 0.813778 |
| pseudothionine                | 1.041909 | 1.143579 | 0.985813 | 0.948274 | 1.065337 | 1.088015 | 0.920864 | 0.986791 | 0.897728 | 1.103614  | 0.955421  | 0.982927 | 1.006783 | 1.008162 | 0.66642  |
| pyroglutamic acid             | 1.051748 | 1.081115 | 0.934669 | 0.742056 | 0.875179 | 1.088426 | 0.85926  | 0.807865 | 0.785555 | 0.911034  | 0.877685  | 0.818132 | 0.82352  | 0.863191 | 0.90593  |
| pyruvate                      | 1.500719 | 1.410109 | 1.011691 | 1.112329 | 0.95029  | 0.829393 | 0.95836  | 1.017374 | 0.971718 | 0.919663  | 0.942799  | 0.792177 | 0.976093 | 0.950783 | 0.965914 |
| retinoic acid                 | 0.929536 | 1.1576   | 0.840341 | 0.9254   | 1.061082 | 0.86769  | 1.251747 | 0.880777 | 1.215312 | 1.085632  | 1.049216  | 0.826637 | 1.205203 | 1.08877  | 0.996401 |
| riboflavin                    | 1.143077 | 0.745262 | 0.588784 | 1.12824  | 0.731518 | 0.613035 | 1.044183 | 0.799343 | 1.015825 | 1.249761  | 1.054405  | 1.069476 | 1.037551 | 1.463966 | 1.065417 |
| ribose                        | 1.148383 | 1.170153 | 1.31831  | 1.038426 | 0.991122 | 1.098484 | 0.994689 | 0.917115 | 1.091949 | 1.02191   | 1.075666  | 0.952141 | 1.052656 | 0.961839 | 0.615166 |
| ribothymidine                 | 1.160023 | 0.683647 | 1.110554 | 0.617185 | 0.873518 | 0.876325 | 1.33251  | 0.731758 | 1.224383 | 0.774286  | 0.978881  | 1.007263 | 0.961826 | 1.600606 | 1.218197 |
| sebacin acid                  | 0.955621 | 0.862236 | 0.982807 | 0.906563 | 1.042936 | 1.035594 | 0.877326 | 0.957968 | 0.973519 | 1.034377  | 1.001715  | 1.09174  | 1.037903 | 1.095951 | 1.133727 |
| serine                        | 0.884474 | 1.020292 | 0.967121 | 0.937478 | 0.911819 | 0.870216 | 0.804476 | 0.979469 | 0.867035 | 0.911795  | 0.991229  | 1.022169 | 1.048749 | 0.94323  | 1.025038 |
| serotonin                     | 0.78133  | 0.988294 | 1.084099 | 0.814206 | 0.74097  | 0.875118 | 0.928214 | 1.122485 | 0.957912 | 0.690019  | 0.910321  | 0.92988  | 0.96194  | 1.087274 | 0.887211 |
| sialic acid                   | 1.063576 | 0.785373 | 1.137522 | 0.798356 | 1.011986 | 0.827471 | 1.236665 | 1.006811 | 0.815251 | 0.916687  | 0.942057  | 0.98613  | 0.840371 | 1.18168  | 1.249553 |
| S-methyl-5'-thioadenosine     | 1.159552 | 1.082685 | 0.903102 | 1.179406 | 1.118345 | 1.199602 | 0.982016 | 0.644322 | 0.564473 | 0.66495   | 1.091696  | 1.246122 | 0.90982  | 0.672646 | 0.671444 |
| Sorbitol                      | 0.800033 | 1.270666 | 1.082785 | 1.184799 | 1.029515 | 1.326677 | 1.175988 | 0.954411 | 1.076149 | 1.228845  | 1.175921  | 1.039359 | 1.045917 | 0.695551 | 1.064205 |
| stearyl carnitine C18         | 0.962766 | 0.929176 | 0.927637 | 1.204338 | 1.208791 | 1.240194 | 1.244083 | 1.270105 | 0.980857 | 0.913165  | 0.911472  | 0.956372 | 0.986241 | 0.991781 | 1.046456 |
| succinate                     | 1.641139 | 1.750201 | 1.774631 | 1.246595 | 1.299314 | 1.335397 | 1.218011 | 1.223271 | 1.774412 | 1.924098  | 1.100391  | 0.89849  | 0.999857 | 0.885749 | 0.807322 |
| syringine                     | 0.80046  | 0.928245 | 0.617453 | 0.919242 | 0.692977 | 0.731972 | 0.947929 | 0.870908 | 0.657812 | 0.722476  | 0.896902  | 0.965429 | 0.736803 | 2.472227 | 2.80149  |
| taurine                       | 0.919041 | 1.047484 | 0.69464  | 0.846434 | 1.126026 | 1.3305   | 1.038894 | 0.833097 | 0.825431 | 0.839644  | 1.097076  | 1.048609 | 0.97559  | 1.074227 | 1.488243 |
| tetrahydroxychoylic acid      | 0.634685 | 0.701889 | 0.973179 | 1.028941 | 0.995015 | 1.193003 | 0.996344 | 1.258128 | 1.224368 | 0.988283  | 0.967021  | 1.077839 | 0.976111 | 0.94331  | 1.029044 |
| tetradecanoyl carnitine C14:2 | 1.407335 | 1.385873 | 0.964131 | 2.352229 | 2.37938  | 3.006143 | 2.231265 | 2.058225 | 2.121065 | 2.56334   | 0.89272   | 0.810109 | 0.765952 | 0.774964 | 0.727107 |
| tetradecenoyl carnitine C14:1 | 1.639786 | 1.43     |          |          |          |          |          |          |          |           |           |          |          |          |          |

|                                               |          |          |          |          |          |          |          |           |           |           |          |          |          |          |          |          |           |           |           |          |
|-----------------------------------------------|----------|----------|----------|----------|----------|----------|----------|-----------|-----------|-----------|----------|----------|----------|----------|----------|----------|-----------|-----------|-----------|----------|
| 5-Methylcytidine                              | 1.130702 | 0.922078 | 0.997396 | 0.830656 | 1.055874 | 0.744943 | 0.947631 | 0.953181  | 1.0949    | 0.96855   | 0.278483 | 0.241315 | 0.469852 | 0.556606 | 0.419407 | 0.147057 | 0.207112  | 0.383133  | 0.244178  | 0.291803 |
| 5-Methylcytosine                              | 0.75891  | 0.652025 | 1.281648 | 0.903753 | 1.181812 | 0.759962 | 0.738669 | not measu | not measu | not measu | 1.1235   | 0.399426 | 0.596668 | 0.475    | 0.488016 | 0.280875 | not measu | not measu | not measu | 0.339778 |
| acetate                                       | 1.280169 | 1.045203 | 1.329993 | 1.557428 | 1.209534 | 1.0617   | 1.067192 | 1.116323  | 1.067013  | 0.513444  | 0.452467 | 0.728044 | 0.663448 | 0.752529 | 0.910295 | 0.817467 | 0.848435  | 0.470991  | 0.866745  |          |
| acetoacetate                                  | 1.216599 | 0.968468 | 1.030828 | 0.824202 | 0.955117 | 0.859062 | 1.018785 | 1.085572  | 0.946301  | 0.831719  | 1.353975 | 1.368462 | 1.023707 | 0.697157 | 0.74909  | 0.736316 | 0.887552  | 1.001299  | 0.473034  | 0.752314 |
| acetyl carnitine C2                           | 1.08714  | 0.869818 | 0.885133 | 0.76632  | 0.922308 | 0.833835 | 1.037651 | 1.025532  | 0.85      | 0.918231  | 1.077393 | 1.112788 | 0.895467 | 0.759692 | 0.805971 | 0.738518 | 0.746508  | 0.767916  | 0.687454  | 0.787524 |
| acetylcholine                                 | 1.164425 | 0.917346 | 0.977796 | 0.890385 | 0.969335 | 0.811859 | 1.007102 | 1.089407  | 1.106801  | 0.975783  | 0.889545 | 1.01067  | 0.701912 | 0.742032 | 0.670245 | 0.576098 | 0.817196  | 1.089557  | 0.71362   | 0.747539 |
| acetyl-isolectine                             | 1.023276 | 1.194436 | 0.983901 | 1.018251 | 1.030488 | 1.061253 | 1.000802 | 0.978544  | 1.189181  | 1.042395  | 0.68974  | 0.75443  | 0.702897 | 1.25689  | 1.25073  | 0.570738 | 0.708231  | 0.780122  | 0.72165   | 0.650773 |
| acetyllysine                                  | 1.404981 | 0.981126 | 1.014034 | 0.892931 | 0.989998 | 0.843465 | 1.157193 | 1.050309  | 0.965304  | 0.946244  | 0.824848 | 0.708213 | 0.517625 | 0.736074 | 0.723285 | 0.60582  | 0.783831  | 0.897611  | 0.853686  | 0.874897 |
| acetyl-valine                                 | 0.763839 | 0.907709 | 0.956966 | 0.811945 | 0.878412 | 0.695526 | 0.912286 | 0.767848  | 0.836177  | 0.507645  | 0.674419 | 0.435414 | 0.636707 | 0.433366 | 0.572792 | 0.640142 | 0.50171   | 0.427833  | 0.487992  |          |
| aconitate                                     | 1.656784 | 1.032552 | 1.314568 | 0.807421 | 0.833477 | 0.680715 | 0.574973 | 0.661015  | 1.063614  | 1.00506   | 0.619946 | 0.532844 | 0.382731 | 0.947886 | 0.280287 | 0.818248 | 0.890996  | 0.887714  | 1.126763  | 0.471655 |
| adenosine                                     | 0.848318 | 1.077284 | 0.767111 | 0.777729 | 0.954041 | 1.067025 | 0.856268 | 0.911231  | 0.976038  | 1.095603  | 0.690664 | 0.766731 | 0.754453 | 0.981414 | 0.828027 | 0.805729 | 0.710255  | 0.159543  | 0.44748   | 0.679611 |
| α-ketoglutarate                               | 0.917084 | 1.056074 | 1.017003 | 0.960605 | 1.082492 | 1.015912 | 1.05616  | 1.04448   | 1.024705  | 0.972535  | 1.22506  | 1.341092 | 0.897533 | 0.912516 | 1.020845 | 0.887039 | 0.972941  | 0.839254  | 0.902763  |          |
| alanine                                       | 1.13022  | 0.930796 | 1.055966 | 1.023682 | 1.047547 | 0.770723 | 0.825247 | 1.204168  | 1.284176  | 1.02827   | 1.171767 | 1.854408 | 1.748131 | 1.296705 | 1.825294 | 1.100973 | 1.05459   | 1.051071  | 1.565315  |          |
| allantoin                                     | 0.856785 | 1.098704 | 1.022562 | 1.118094 | 1.044752 | 0.973668 | 0.992534 | 1.004677  | 0.928699  | 0.962826  | 0.797001 | 1.062285 | 0.868913 | 0.805363 | 0.58863  | 0.66844  | 0.595667  | 0.624056  | 0.649737  | 0.732181 |
| amino acid                                    | 1.013952 | 1.141396 | 1.007452 | 1.004803 | 1.076514 | 1.023855 | 0.954591 | 0.967173  | 0.652116  | 0.920968  | 0.648154 | 0.766838 | 0.745796 | 0.771707 | 0.611711 | 0.655    | 0.657593  | 0.625372  | 0.592955  | 0.780017 |
| aminoisopropionic acid                        | 0.961697 | 1.155138 | 0.953842 | 0.898951 | 1.086532 | 1.003561 | 0.980888 | 0.893183  | 0.914444  | 1.030309  | 0.921979 | 1.018505 | 0.94777  | 0.7944   | 0.674509 | 0.76054  | 0.682444  | 0.782325  | 0.787248  | 0.855605 |
| aminolevulinic acid                           | 1.071008 | 0.717504 | 0.824893 | 1.065417 | 0.94588  | 1.13026  | 1.134037 | 1.154166  | 1.177017  | 0.914402  | 0.707114 | 0.819397 | 1.207503 | 0.972284 | 0.942194 | 0.967101 | 0.708673  | 0.931669  | 0.822436  | 1.150102 |
| anthranilate                                  | 1.401714 | 0.976948 | 0.928765 | 1.816473 | 0.615529 | 2.578111 | 1.020545 | 2.09581   | 1.72892   | 1.10475   | 0.755516 | 0.94064  | 0.949872 | 1.301746 | 1.723936 | 1.062382 | 1.925629  | 1.227712  | 0.944756  |          |
| arachidoyl carnitine eicosanoyl carnitine C20 | 0.866751 | 0.873032 | 0.915813 | 0.991248 | 1.083266 | 1.299997 | 1.026022 | 1.022001  | 1.075599  | 1.011425  | 1.048749 | 1.171246 | 1.122025 | 0.948852 | 1.106735 | 1.074117 | 0.985104  | 1.04471   | 1.01054   | 0.981519 |
| arginine                                      | 0.983212 | 1.402397 | 0.898612 | 1.115538 | 1.17379  | 1.02261  | 1.091408 | 0.973426  | 0.836489  | 0.948035  | 0.577405 | 0.723053 | 1.08993  | 1.041419 | 0.463512 | 0.982376 | 0.64115   | 0.237877  | 0.964518  | 0.748088 |
| asparagine                                    | 0.834155 | 1.106197 | 0.886364 | 0.926821 | 1.097061 | 0.937622 | 1.005419 | 0.948766  | 0.950341  | 0.990303  | 1.305211 | 1.277525 | 1.096833 | 1.020564 | 1.098201 | 1.053569 | 0.978764  | 1.081022  | 0.959369  | 1.054832 |
| ascorbic acid                                 | 0.75101  | 1.007818 | 1.220492 | 1.087864 | 1.09464  | 1.143256 | 1.097418 | 0.849796  | 0.865609  | 0.666707  | 0.4339   | 0.468007 | 0.640276 | 0.689822 | 1.131594 | 0.908253 | 0.594253  | 0.578444  | 0.419569  | 0.466833 |
| aspartate                                     | 1.02258  | 1.056214 | 0.890761 | 1.162198 | 1.007212 | 1.118355 | 1.002513 | 0.980248  | 0.981921  | 0.972046  | 1.501872 | 1.543257 | 0.903799 | 1.000521 | 1.083742 | 1.074006 | 0.837018  | 0.941139  | 0.995337  | 0.841059 |
| BAIBA                                         | 1.022626 | 0.561679 | 0.801265 | 1.162118 | 0.916458 | 1.214425 | 0.879636 | 0.957732  | 1.137268  | 0.960186  | 1.302091 | 1.202509 | 1.156172 | 0.590265 | 1.143319 | 0.76207  | 0.75007   | 0.87447   | 0.80477   | 1.035026 |
| benzoic acid                                  | 0.918751 | 0.973778 | 1.920268 | 1.341128 | 0.917659 | 1.273734 | 0.925036 | 1.030512  | 1.201166  | 1.039997  | 0.266985 | 0.867799 | 0.692011 | 0.751503 | 0.889445 | 0.618713 | 0.647063  | 0.576389  | 0.426974  | 0.380213 |
| biotin                                        | 0.796377 | 0.661521 | 1.449847 | 0.834155 | 1.116666 | 1.254547 | 0.991346 | 1.242039  | 0.887092  | 0.398277  | 0.385605 | 0.402003 | 0.166468 | 0.993276 | 1.161243 | 0.811435 | 0.81437   | 0.846787  | 0.995629  |          |
| butyrate                                      | 1.18305  | 0.855555 | 0.969237 | 0.800229 | 0.940448 | 0.848785 | 0.849107 | 0.914419  | 0.815748  | 0.610734  | 0.521568 | 0.703428 | 0.506556 | 0.433919 | 0.405766 | 0.71191  | 0.821198  | 0.329243  | 0.32338   |          |
| butyryl carnitine or isobutyryl carnitine C4  | 1.272513 | 0.934248 | 1.115407 | 1.396757 | 0.788349 | 0.951808 | 1.091792 | 0.928926  | 0.962291  | 0.771927  | 1.141591 | 0.838927 | 1.313614 | 1.18224  | 0.84644  | 0.737424 | 0.808794  | 0.848902  | 0.866274  | 1.044111 |
| C14:0                                         | 1.084243 | 0.987674 | 1.037031 | 0.995786 | 0.764153 | 1.174901 | 0.980674 | 0.887996  | 0.684211  | 0.812813  | 1.598249 | 1.284599 | 1.101177 | 1.012203 | 0.838783 | 0.984339 | 1.215967  | 1.24338   | 0.878955  | 0.858663 |
| C14:1                                         | 0.979162 | 0.985464 | 0.842284 | 0.702633 | 0.980693 | 0.953018 | 0.944819 | 1.101698  | 0.939361  | 1.123483  | 1.468004 | 1.189167 | 1.080497 | 0.950335 | 1.116074 | 1.029313 | 1.198779  | 1.204226  | 0.919931  | 0.933913 |
| C14:2                                         | 1.037429 | 0.834435 | 0.927596 | 1.275837 | 0.883597 | 0.994885 | 0.925064 | 0.915278  | 0.924048  | 0.972472  | 1.254307 | 1.715984 | 1.05237  | 0.951872 | 0.826255 | 0.812891 | 0.851546  | 0.854566  | 0.819943  | 0.818456 |
| C15:0                                         | 1.110136 | 1.188788 | 1.247006 | 1.226594 | 0.925564 | 0.991747 | 0.99571  | 1.077469  | 0.661875  | 0.776233  | 1.326944 | 0.740408 | 0.867709 | 1.252395 | 0.674791 | 0.815897 | 1.001717  | 0.960268  | 0.970242  | 0.754566 |
| C15:1                                         | 1.145424 | 0.945528 | 1.038553 | 1.121978 | 0.953296 | 0.880521 | 0.94013  | 0.962803  | 0.764416  | 0.83065   | 1.204148 | 0.793981 | 1.219175 | 0.80998  | 0.880095 | 0.80273  | 1.0513    | 0.921058  | 0.838167  | 0.742259 |
| C16:0                                         | 1.159958 | 1.232773 | 1.511211 | 1.406249 | 1.007177 | 0.945522 | 0.983029 | 1.084376  | 0.627538  | 0.642943  | 0.990928 | 0.612327 | 1.032146 | 1.273737 | 0.755798 | 0.817235 | 0.973586  | 0.978093  | 0.736172  | 0.550342 |
| C16:1                                         | 1.1271   | 1.17548  | 1.750303 | 1.618722 | 0.930685 | 0.923772 | 1.17878  | 1.289922  | 0.528733  | 0.536662  | 0.658602 | 0.650223 | 1.638799 | 1.514683 | 0.768207 | 0.74054  | 0.893267  | 0.988427  | 0.654277  | 1.054403 |
| C16:2                                         | 1.158211 | 0.962464 | 1.052679 | 1.314017 | 0.882452 | 0.995959 | 0.965775 | 0.91391   | 0.883825  | 0.996974  | 1.973399 | 1.044374 | 1.127609 | 0.830888 | 0.869023 | 0.80963  | 1.010192  | 0.998799  | 0.921151  | 0.666317 |
| C17:0                                         | 1.180622 | 1.225319 | 1.515653 | 1.180961 | 0.994451 | 1.047107 | 0.951701 | 0.922786  | 0.77165   | 0.8331    | 1.24667  | 0.762664 | 1.00672  | 1.141243 | 0.781644 | 0.747433 | 0.947874  | 1.01232   | 0.800737  | 0.665443 |
| C17:1                                         | 1.154219 | 1.254219 | 1.219012 | 1.556792 | 1.004219 | 1.196633 | 1.163059 | 0.973939  | 0.637187  | 0.80911   | 1.444567 | 1.495051 | 1.32189  | 0.837895 | 0.918975 | 1.152864 | 0.909096  | 0.904472  | 0.922198  |          |
| C17:2                                         | 1.183317 | 0.869977 | 1.10736  | 1.156942 | 0.967745 | 0.882366 | 0.979981 | 1.001624  | 0.879718  | 0.830308  | 1.265684 | 1.449838 | 1.059057 | 0.732729 | 0.890322 | 1.16028  | 0.798858  | 0.908198  | 0.857738  |          |
| C18:0                                         | 1.27002  | 1.035899 | 1.432961 | 1.299819 | 1.006571 | 0.895156 | 0.992599 | 0.946766  | 0.821418  | 0.845968  | 1.062897 | 0.942626 | 1.029472 | 0.825282 | 0.909498 | 1.05862  | 0.957638  | 0.8247    | 0.739383  |          |
| C18:1                                         | 1.176082 | 1.180664 | 1.658363 | 1.170915 | 0.964651 | 1.046461 | 0.942439 | 0.971947  | 0.756011  | 1.02846   | 0.972766 | 1.735986 | 1.21076  | 0.840168 | 0.810397 | 0.99365  | 1.032023  | 0.775887  | 0.648118  |          |
| C18:2                                         | 1.118099 | 1.027058 | 1.668951 | 1.289777 | 1.026675 | 0.926222 | 1.028004 | 1.049184  | 0.858507  | 0.612886  | 1.03243  | 0.673243 | 1.494885 | 1.306984 | 0.818504 | 0.789734 | 0.995749  | 1.075586  | 0.670613  | 0.553999 |
| C18:3                                         | 1.159139 | 1.086509 | 2.573311 | 1.786582 | 0.94878  | 0.820986 | 1.778852 | 0.588282  | 0.541183  | 0.511307  | 0.769366 | 0.469523 | 0.837924 | 1.897159 | 1.741146 | 0.70628  | 1.294838  | 0.966561  | 0.605398  | 0.491871 |
| C18:4                                         | 1.10012  | 0.946635 | 0.881854 | 1.050182 | 1.085088 | 0.97243  | 1.072002 | 0.946874  | 0.956613  | 0.983219  | 1.15883  | 1.118807 | 1.258966 | 1.034007 | 1.064172 | 1.02567  | 1.02914   | 1.125885  | 1.199936  | 0.595934 |
| C19:0                                         | 1.231696 | 1.007143 | 1.147866 | 1.293759 | 1.093152 | 0.965262 | 0.99465  | 0.889721  | 0.875146  | 0.950487  | 1.056864 | 0.87569  | 1.191717 | 0.950355 | 0.868882 | 0.808983 | 1.002185  | 0.998292  | 0.963069  | 0.853267 |
| C19:1                                         | 1.228311 | 1.007143 | 1.963655 | 1.186469 | 0.978899 | 0.884021 | 0.878614 | 0.916209  | 1.034721  | 0.824537  | 1.05226  | 0.87569  | 1.087384 | 0.803685 | 0.804895 | 0.941624 | 0.917669  | 1.086651  | 0.791911  | 0.77166  |
| C19:2                                         | 1        |          |          |          |          |          |          |           |           |           |          |          |          |          |          |          |           |           |           |          |

|                           |          |          |          |          |          |          |          |          |          |          |          |          |          |          |          |          |          |          |          |          |
|---------------------------|----------|----------|----------|----------|----------|----------|----------|----------|----------|----------|----------|----------|----------|----------|----------|----------|----------|----------|----------|----------|
| glycycolamine             | 0.891084 | 0.964712 | 1.111376 | 1.034979 | 1.103805 | 1.16287  | 1.435634 | 1.366582 | 1.123219 | 1.253557 | 0.848659 | 4.744689 | 3.488866 | 2.132836 | 4.180505 | 4.13425  | 4.150864 | 3.241978 | 3.346162 | 3.812397 |
| guanine                   | 0.952677 | 1.202676 | 0.922823 | 0.93898  | 1.043395 | 0.99961  | 0.827419 | 1.088741 | 0.983711 | 1.193375 | 1.93864  | 1.374797 | 1.479026 | 0.961259 | 1.207326 | 1.145247 | 1.068122 | 0.932714 | 0.905916 | 0.948515 |
| guanosine                 | 0.421267 | 1.065425 | 0.583257 | 0.713176 | 0.702811 | 0.787591 | 0.978999 | 1.44761  | 0.85211  | 1.227552 | 2.207122 | 2.343764 | 1.475612 | 1.570552 | 2.584414 | 3.946644 | 1.096814 | 0.873987 | 1.303876 | 1.042700 |
| hexadecyl carnitine C16:1 | 1.354334 | 1.166312 | 0.825531 | 1.112934 | 1.250337 | 1.90265  | 0.871336 | 0.672061 | 1.56442  | 0.818634 | 0.621102 | 0.604992 | 0.687991 | 0.856826 | 1.053749 | 0.857308 | 0.914265 | 0.888443 | 0.899808 | 0.716729 |
| hexanoyl carnitine C6     | 1.292467 | 1.026534 | 0.874172 | 0.775134 | 0.953871 | 1.358287 | 1.118999 | 1.022994 | 0.861755 | 0.866476 | 0.4313   | 0.514693 | 0.660617 | 0.404092 | 0.814888 | 0.928708 | 0.688262 | 0.708533 | 0.376103 | 0.361320 |
| hippuric acid             | 1.171977 | 0.984401 | 0.94038  | 1.346634 | 1.13737  | 0.914851 | 1.080402 | 1.435215 | 1.189991 | 0.9133   | 1.146266 | 0.938597 | 0.979985 | 0.745957 | 1.095371 | 0.833334 | 0.927071 | 1.063468 | 0.974663 | 0.898979 |
| homocarnitine             | 1.138156 | 0.962025 | 0.968491 | 0.709641 | 0.919562 | 0.847666 | 0.969391 | 1.236668 | 1.096598 | 1.05216  | 1.173399 | 1.373505 | 0.885411 | 0.704724 | 0.745723 | 0.761613 | 0.911286 | 0.968681 | 1.056221 | 1.017835 |
| homocarnitine             | 1.23612  | 0.966871 | 0.952672 | 0.63012  | 0.902515 | 0.75113  | 1.168785 | 1.027078 | 0.934649 | 1.123821 | 0.652602 | 0.678806 | 0.62089  | 0.696881 | 0.542534 | 0.445824 | 0.702625 | 0.676716 | 0.620678 | 0.720806 |
| homocitrusine             | 1.227393 | 0.890243 | 1.045649 | 0.825253 | 0.964037 | 0.703173 | 1.149758 | 0.919911 | 1.177312 | 1.593646 | 1.355061 | 1.120287 | 0.71823  | 0.691592 | 0.742149 | 0.820282 | 1.026431 | 0.9298   | 0.928727 | 0.958634 |
| homocystecic acid         | 1.187851 | 0.93032  | 0.919757 | 1.241656 | 0.978891 | 1.115813 | 0.987585 | 1.018309 | 1.035873 | 1.009761 | 1.301221 | 1.075111 | 0.804717 | 0.864881 | 1.060045 | 1.126092 | 0.788488 | 0.938894 | 0.956719 | 1.011981 |
| homocysteine              | 0.95593  | 1.021634 | 0.99773  | 0.98301  | 1.102811 | 0.986395 | 1.056664 | 1.034844 | 0.543308 | 1.108655 | 1.005255 | 1.028585 | 0.875797 | 0.837261 | 0.941656 | 1.116072 | 0.888166 | 1.058654 | 1.037127 | 1.077448 |
| homogentisic acid         | 1.182781 | 1.246205 | 1.351072 | 1.988484 | 1.118844 | 1.614303 | 1.051726 | 0.993188 | 1.010163 | 1.219991 | 0.313389 | 0.260251 | 0.366833 | 0.894424 | 0.898312 | 1.165148 | 0.74501  | 0.682261 | 0.652383 | 0.919563 |
| hydroquinone              | 0.945795 | 0.933216 | 0.910181 | 1.066012 | 1.110644 | 1.049126 | 1.032726 | 1.122206 | 0.941583 | 1.039931 | 0.823551 | 1.067165 | 0.940008 | 0.888938 | 0.891939 | 0.873104 | 0.772778 | 0.821741 | 0.865702 | 1.059834 |
| hydroxyindoleacetic acid  | 0.721482 | 0.89116  | 0.881528 | 1.034143 | 0.989579 | 1.341899 | 1.414113 | 1.094202 | 1.045991 | 0.923213 | 0.210197 | 0.387899 | 0.563754 | 0.758723 | 1.013686 | 0.600334 | 0.704043 | 0.533764 | 0.234706 | 0.384955 |
| hydroxyphenyllactic acid  | 1.195858 | 0.956306 | 0.439761 | 1.713643 | 1.221128 | 1.533639 | 1.441113 | 0.919428 | 1.019448 | 1.235212 | 0.202197 | 0.267666 | 1.416182 | 0.803518 | 1.446524 | 0.678541 | 0.962941 | 0.272747 | 0.943158 | 0.931545 |
| hydroxyphenylpyruvate     | 0.907857 | 0.979729 | 1.609444 | 1.025655 | 0.880434 | 1.61811  | 1.234949 | 0.979513 | 1.05451  | 1.098731 | 0.200998 | 0.208003 | 0.548364 | 1.04335  | 0.653891 | 0.984344 | 0.424971 | 0.514821 | 0.313621 | 0.833366 |
| hydroxyproline            | 1.04432  | 0.915256 | 0.938562 | 0.846225 | 0.809717 | 0.741277 | 0.945771 | 0.95916  | 0.95547  | 0.960926 | 0.898727 | 0.950542 | 0.813403 | 0.666165 | 0.482864 | 0.520607 | 0.689559 | 0.778798 | 0.794077 | 0.60939  |
| hypotaurine               | 0.928074 | 1.145355 | 0.623114 | 0.625373 | 0.866735 | 1.315663 | 0.762088 | 0.790887 | 0.670378 | 1.113519 | 0.843443 | 0.954143 | 1.010118 | 1.019051 | 1.221236 | 0.912104 | 0.95324  | 0.754343 | 1.274706 | 1.125014 |
| hypoxanthine              | 0.740393 | 1.170534 | 1.07507  | 1.161291 | 1.074751 | 1.219169 | 0.934033 | 0.700214 | 0.908153 | 0.936744 | 1.177758 | 1.4551   | 1.39157  | 1.047941 | 1.312998 | 1.034662 | 0.908138 | 0.94104  | 0.874773 | 0.853917 |
| imidazoleacetic acid      | 1.18271  | 0.959191 | 0.966617 | 1.004411 | 1.022055 | 0.84087  | 1.097687 | 1.000288 | 0.948064 | 1.06982  | 1.027216 | 1.080741 | 1.011531 | 0.816843 | 0.863767 | 0.919632 | 0.924882 | 0.803943 | 0.752024 | 0.892338 |
| indole-3-acetic acid      | 0.774045 | 0.868031 | 0.909855 | 1.203418 | 0.985065 | 1.069848 | 1.109787 | 1.432523 | 0.966736 | 0.802508 | 0.729109 | 0.163598 | 0.874485 | 0.837835 | 1.000457 | 0.956562 | 1.270585 | 0.719609 | 1.030416 | 0.715711 |
| indole-3-proprionate      | 0.928396 | 0.826203 | 0.907983 | 0.940057 | 0.953496 | 1.03418  | 0.80634  | 0.958273 | 1.083108 | 0.978686 | 0.645378 | 0.547628 | 0.776618 | 0.688236 | 0.899277 | 1.269686 | 0.781003 | 0.861336 | 0.863585 | 0.818387 |
| indoleacrylic acid        | 1.164385 | 0.843957 | 0.905591 | 0.691012 | 0.924297 | 0.729003 | 1.12661  | 1.126215 | 0.938952 | 0.9928   | 0.997654 | 0.948082 | 1.155996 | 0.947371 | 0.848622 | 0.83188  | 1.026975 | 1.054563 | 0.934565 | 0.929038 |
| indoleoleic acid          | 0.807266 | 0.753316 | 0.821573 | 0.950603 | 1.068918 | 0.986388 | 0.834735 | 1.108577 | 1.247339 | 0.726431 | 0.171078 | 0.729138 | 0.620177 | 0.644517 | 1.039009 | 0.830135 | 0.756582 | 0.809784 | 0.761866 | 0.26027  |
| indolepyruvate            | 0.845643 | 0.78165  | 0.869732 | 0.904722 | 0.984365 | 0.892858 | 0.988915 | 1.094718 | 0.960205 | 1.188395 | 0.616351 | 0.367433 | 0.570622 | 0.756673 | 0.878881 | 0.71291  | 0.68531  | 0.685237 | 0.664393 | 0.618165 |
| indoxyl sulfate           | 0.956228 | 0.925316 | 0.972449 | 1.005106 | 1.019587 | 0.974258 | 0.900246 | 1.040946 | 0.94427  | 1.431634 | 1.289966 | 0.166739 | 0.719765 | 1.083922 | 0.712149 | 0.989026 | 0.623602 | 0.672017 | 0.711294 | 0.756263 |
| inosine                   | 1.148274 | 1.195485 | 0.757711 | 1.088683 | 0.777978 | 1.099087 | 0.912399 | 0.658736 | 0.993258 | 0.979184 | 1.268787 | 0.897875 | 1.08181  | 1.042937 | 1.793189 | 1.706268 | 0.941444 | 1.206428 | 1.230931 | 1.076809 |
| inositol                  | 0.864068 | 1.05405  | 0.959764 | 0.991642 | 1.051517 | 1.376917 | 1.023386 | 0.940618 | 0.875365 | 0.938475 | 0.785713 | 0.691449 | 0.977568 | 0.927195 | 0.87249  | 0.737721 | 0.682205 | 0.651635 | 0.671524 | 0.716809 |
| isoleucine                | 0.94563  | 1.056563 | 1.031738 | 0.990471 | 1.10106  | 1.052112 | 1.03485  | 0.978712 | 1.001004 | 1.047267 | 1.085257 | 1.067409 | 1.051302 | 0.942486 | 1.084897 | 1.130962 | 0.994623 | 1.017972 | 0.918366 | 0.988016 |
| isovaleryl carnitine C5   | 0.920815 | 0.78527  | 0.960144 | 0.856766 | 0.886735 | 0.860713 | 0.938785 | 1.009883 | 1.151466 | 1.06095  | 0.422295 | 0.323443 | 0.597192 | 0.580157 | 0.596891 | 0.630969 | 0.680932 | 0.546155 | 0.263663 | 0.329265 |
| kyurenae                  | 1.23574  | 0.988887 | 1.196846 | 1.298816 | 0.964701 | 1.544117 | 0.944016 | 1.373081 | 1.158216 | 1.117187 | 1.3782   | 1.1041   | 0.714383 | 0.790269 | 0.945027 | 0.133159 | 0.78824  | 0.902956 | 1.121771 | 0.83983  |
| kyurenae                  | 1.053642 | 0.943096 | 0.819159 | 0.773204 | 0.942105 | 1.069893 | 1.441639 | 0.877552 | 0.879514 | 0.850297 | 1.166484 | 0.421523 | 1.027989 | 0.877449 | 0.636735 | 0.573443 | 1.074292 | 1.07151  | 0.28304  | 0.521441 |
| lactate                   | 0.827766 | 1.161175 | 0.850799 | 0.829563 | 1.02118  | 1.149466 | 0.832513 | 0.891627 | 1.060609 | 1.14047  | 0.809762 | 0.963079 | 0.857286 | 0.872464 | 1.0073   | 0.92483  | 0.822736 | 0.89475  | 0.651977 | 0.747924 |
| lauroyl carnitine C12     | 0.675567 | 0.729981 | 1.053903 | 0.624801 | 0.731626 | 1.235944 | 0.839978 | 1.021630 | 1.123634 | 1.289966 | 0.166739 | 0.719765 | 1.083922 | 0.712149 | 0.989026 | 0.623602 | 0.234064 | 0.54057  | 0.517485 | 0.618379 |
| leucine                   | 0.96687  | 1.048613 | 1.020573 | 1.037466 | 1.147485 | 0.960447 | 0.602627 | 0.997277 | 0.972718 | 1.119228 | 1.125517 | 1.120137 | 1.153776 | 1.027458 | 1.169719 | 1.207953 | 1.042449 | 1.105682 | 0.902739 | 1.054703 |
| L-Fucose                  | 1.236811 | 0.989459 | 1.189855 | 0.982744 | 1.103132 | 1.028466 | 1.065147 | 0.821689 | 1.196004 | 1.027408 | 0.802524 | 1.459326 | 1.174989 | 0.866704 | 0.967825 | 1.209690 | 1.001486 | 0.798424 | 0.942524 | 1.03136  |
| limoleyl carnitine C18:2  | 1.359409 | 1.001404 | 0.755312 | 0.849468 | 1.219275 | 1.264903 | 0.923951 | 0.895387 | 1.165199 | 0.967375 | 0.759348 | 0.639495 | 0.546089 | 0.638466 | 1.021407 | 0.300281 | 0.913613 | 0.863131 | 0.918227 | 0.748461 |
| lithocholic acid          | 0.906956 | 0.749053 | 0.501507 | 0.416578 | 0.977709 | 0.964209 | 0.664399 | 0.417193 | 0.539646 | 1.273378 | 0.735169 | 0.679465 | 0.674945 | 0.333752 | 0.328778 | 0.555145 | 0.401251 | 0.195525 | 0.461505 | 0.624288 |
| L-Rhamnose                | 0.983668 | 1.09811  | 0.969981 | 0.986241 | 1.130616 | 1.042981 | 0.967692 | 1.053357 | 1.006076 | 1.014882 | 1.336249 | 1.285994 | 0.930336 | 0.826563 | 1.023499 | 0.935313 | 0.915538 | 0.882424 | 1.104147 | 0.941048 |
| L-Threonine acid          | 0.941048 | 1.067532 | 1.02544  | 0.608339 | 1.225927 | 1.144888 | 0.927968 | 1.03737  | 1.137028 | 1.138296 | 0.550914 | 0.862544 | 0.854823 | 0.812021 | 0.639005 | 0.805804 | 0.807804 | 0.677671 | 0.800878 | 0.908878 |
| lysine                    | 0.911164 | 0.999099 | 1.064638 | 1.119155 | 1.112147 | 0.975791 | 0.949456 | 0.982634 | 1.131367 | 1.178644 | 1.163792 | 1.048684 | 0.737545 | 1.284685 | 1.182524 | 1.313169 | 1.185801 | 1.074302 | 1.094906 | 1.054906 |
| malate                    | 0.812361 | 1.393416 | 1.026298 | 0.928887 | 0.936842 | 0.717181 | 0.734482 | 0.949812 | 1.190659 | 1.068969 | 0.154736 | 0.334758 | 0.444596 | 0.821313 | 0.509977 | 0.445414 | 0.34561  | 0.841478 | 1.143233 | 0.344049 |
| m-coumaric acid           | 0.807593 | 0.980576 | 1.064641 | 0.95274  | 0.784396 | 0.870875 | 0.68544  | 0.985058 | 1.050794 | 1.17698  | 1.137091 | 0.962244 | 0.724729 | 0.611959 | 1.1196   | 1.224726 | 0.639338 | 0.534323 | 0.671407 | 0.628969 |
| methionine                | 0.980203 | 1.085936 | 1.008322 | 0.946006 | 1.114955 | 0.972946 | 0.926889 | 1.036513 | 0.988869 | 1.099022 | 1.214841 | 1.179588 | 1.101383 | 0.957862 | 1.1313   | 1.041137 | 1.054135 | 1.150776 | 1.031678 | 1.128739 |
| methylcysteine            | 0.95593  | 1.021634 | 0.966126 | 0.98301  | 1.102811 | 0.986395 | 1.056664 | 1.034844 | 0.543308 | 1.108655 | 1.005255 | 1.028585 | 0.875797 | 0.837261 | 0.941656 | 1.116072 | 0.888166 | 1.058654 | 1.037127 | 1.077448 |
| methylmalonic acid        | 0.947853 | 1.006671 | 1.051672 | 1.18488  | 1.01696  |          |          |          |          |          |          |          |          |          |          |          |          |          |          |          |

|                      |          |          |          |          |          |          |          |          |          |          |          |          |          |          |          |          |          |          |          |          |
|----------------------|----------|----------|----------|----------|----------|----------|----------|----------|----------|----------|----------|----------|----------|----------|----------|----------|----------|----------|----------|----------|
| tyrosine             | 0.837083 | 1.045402 | 0.999898 | 1.005522 | 1.042921 | 1.041517 | 0.982021 | 0.961947 | 0.991482 | 1.09781  | 1.21909  | 1.293495 | 1.286927 | 1.069041 | 1.155085 | 1.195905 | 1.038519 | 1.126487 | 1.014457 | 1.093014 |
| uracil               | 0.932788 | 1.063141 | 1.235747 | 1.604209 | 0.901518 | 1.107907 | 0.752917 | 0.796671 | 0.675761 | 0.622768 | 0.738791 | 0.683031 | 0.875174 | 1.091517 | 0.624819 | 0.739929 | 0.57966  | 0.425921 | 0.537023 | 0.549889 |
| ureidopropionic acid | 0.812242 | 0.870073 | 0.744441 | 0.865347 | 0.927597 | 1.012399 | 0.849382 | 1.069766 | 0.997611 | 0.993030 | 0.531734 | 0.283923 | 0.494434 | 0.816833 | 0.550581 | 0.540588 | 0.815842 | 0.774886 | 0.568764 | 1.054832 |
| uric acid            | 0.895661 | 1.147406 | 1.26019  | 1.296764 | 0.937732 | 0.827786 | 0.875876 | 0.970969 | 0.912844 | 1.134756 | 0.296559 | 0.429839 | 0.668532 | 0.694365 | 0.208013 | 0.205523 | 0.232516 | 0.221295 | 0.222365 | 0.307175 |
| uridine              | 0.771262 | 0.872242 | 1.447124 | 1.611981 | 0.929261 | 1.236827 | 0.987716 | 1.290343 | 0.968778 | 0.83277  | 0.553754 | 0.586374 | 0.757095 | 0.817783 | 0.982458 | 0.903737 | 0.638544 | 0.676989 | 0.576103 | 0.555383 |
| valine               | 0.973983 | 1.087481 | 0.977659 | 0.986634 | 1.060983 | 0.947486 | 1.026943 | 1.035011 | 0.943949 | 1.061554 | 1.149322 | 1.024862 | 1.041496 | 0.931638 | 1.062101 | 1.056579 | 0.974866 | 1.026639 | 0.920289 | 1.035262 |
| xanthine             | 0.819855 | 0.953782 | 0.999704 | 1.084092 | 0.939899 | 1.169853 | 1.046182 | 1.165796 | 0.910273 | 1.095219 | 0.599723 | 0.650908 | 1.197401 | 1.065139 | 1.279718 | 1.32799  | 0.881647 | 0.728327 | 0.570749 | 0.626523 |
| xanthosine           | 0.975229 | 1.366783 | 1.053126 | 1.140396 | 1.102385 | 1.403298 | 1.093405 | 1.051767 | 1.209818 | 1.001838 | 0.837159 | 0.27154  | 0.520111 | 0.735428 | 0.318721 | 0.36661  | 0.281059 | 0.411437 | 0.367837 | 0.306733 |
| metabolites          | lung     | kidney   |

| metabolite                | ear      | ear      | ear      | ear      | ear      | ear      | urine     |          |          |          |          |          |           |           |          |          |
|---------------------------|----------|----------|----------|----------|----------|----------|----------|----------|----------|----------|----------|----------|----------|----------|----------|----------|----------|----------|----------|-----------|----------|----------|----------|----------|----------|-----------|-----------|----------|----------|
| 1-methyladenosine         | 0.917813 | 0.862269 | 1.270718 | 1.085146 | 1.033596 | 0.994844 | 86.01737 | 67.58253 | 68.92451 | 68.77423 | 108.3987 | 49.13235 | 228.7766 | 181.4589 | 0.90599  | 0.878636 | 0.873216 | 0.972797 | 0.953727 | 1.149581  | 1.303537 | 9.44597  | 8.443991 | 6.578206 | 10.78724 | 11.0816   | 8.511369  | 2.974365 |          |
| 1-methyl-histidine        | 0.820267 | 0.998285 | 0.867374 | 0.943711 | 0.917183 | 0.93843  | 18.01383 | 15.14617 | 7.636948 | 8.583148 | 14.62315 | 13.2633  | 22.18375 | 12.18375 | 1.129598 | 0.983146 | 0.958919 | 0.952534 | 0.933271 | 1.006841  | 102.2432 | 46.18033 | 20.2066  | 17.9932  | 40.67163 | 33.84639  | 53.91814  | 65.03108 |          |
| 2,3-dihydroxybenzoic acid | 0.863212 | 0.87338  | 1.108121 | 0.974829 | 0.999409 | 0.931038 | 17.79707 | 9.100447 | 15.53624 | 13.07578 | 10.53944 | 5.681768 | 5.410036 | 7.875279 | 1.04274  | 1.136966 | 1.087227 | 1.080181 | 1.032562 | 32.15208  | 29.93338 | 24.42739 | 24.3434  | 58.73705 | 82.06275 | 32.2266   |           |          |          |
| 2-aminoacetic acid        | 0.939638 | 1.065062 | 1.022443 | 1.011453 | 0.902961 | 0.966726 | 53.67896 | 56.1393  | 27.66376 | 20.78983 | 48.33302 | 32.87473 | 183.7455 | 148.6807 | 0.84668  | 1.069127 | 0.902389 | 0.849402 | 1.059633 | 1.123613  | 184.6264 | 122.8391 | 271.1377 | 198.3973 | 246.6854 | 256.7725  | 703.8868  | 87.54116 |          |
| 2-hydroxybutyrate         | 1.074937 | 1.190432 | 1.090177 | 1.194752 | 1.257041 | 0.992889 | 5.27043  | 0.202837 | 4.551361 | 5.798775 | 4.279535 | 2.351448 | 0.386668 | 1.699413 | 1.101103 | 1.254084 | 1.052099 | 1.067191 | 1.272753 | 1.272374  | 0.266479 | 0.198775 | 0.300243 | 0.315654 | 0.218821 | 0.031597  | 0.127622  | 0.067667 |          |
| 2-hydroxyisovalerate      | 1.096317 | 1.198032 | 1.001066 | 1.075611 | 1.36648  | 1.076636 | 4.927718 | 3.265193 | 2.09607  | 1.748879 | 1.808849 | 1.736506 | 1.387187 | 1.438764 | 1.147092 | 0.944837 | 0.970665 | 0.979683 | 1.313008 | 1.232765  | 2.990463 | 1.897006 | 1.363485 | 1.369574 | 10.45786 | 8.16219   | 1.084319  | 0.702288 |          |
| 2-Hydroxyoctanoic acid    | 1.182136 | 0.901155 | 0.998934 | 1.028973 | 1.153408 | 0.972157 | 34.46985 | 25.00036 | 23.58009 | 28.41893 | 14.70704 | 1.349653 | 1.502683 | 1.081135 | 1.147077 | 1.254671 | 0.898475 | 0.970911 | 0.894336 | 0.894739  | 0.935009 | 0.659348 | 0.735199 | 0.921344 | 0.743339 | 0.700778  | 0.631072  | 0.373622 |          |
| 2-Ketobutyric acid        | 0.936754 | 0.958197 | 0.891721 | 0.959862 | 1.037168 | 1.155261 | 0.08725  | 0.055331 | 0.088332 | 0.063    | 0.064468 | 0.051898 | 0.056821 | 0.053268 | 0.96206  | 0.877373 | 0.962682 | 1.007265 | 0.974678 | 1.23806   | 0.143353 | 0.083348 | 0.164054 | 0.139113 | 0.24717  | 0.10364   | 0.183181  | 0.155355 |          |
| 2-Keto-isovalerate        | 1.034891 | 1.017716 | 1.169793 | 0.920754 | 1.285173 | 0.948869 | 382.3825 | 326.9739 | 218.9207 | 250.349  | 353.9463 | 190.2116 | 167.3754 | 178.5746 | 0.479495 | 0.373658 | 0.929493 | 0.820517 | 0.577343 | 0.843658  | 273.8929 | 53.44057 | 7.765075 | 14.03466 | 267.1664 | 379.8607  | 113.5188  | 181.73   |          |
| 2-Oxoaliphatic acid       | 1.053847 | 0.839511 | 0.946293 | 1.123052 | 0.720619 | 0.818475 | 2.058723 | 4.511973 | 24.37275 | 5.813477 | 14.96815 | 80.92173 | 34.34348 | 21.78225 | 1.006641 | 0.940292 | 1.149727 | 1.097189 | 1.021958 | 1.146924  | 0.682216 | 0.24315  | 0        | 0.157136 | 0.861686 | 0.763049  | 0.851098  | 0.790686 |          |
| 2-Phenylpropionic acid    | 0.910454 | 0.947282 | 1.20257  | 0.938869 | 0.840219 | 0.833038 | 0.083159 | 0.116539 | 0.102472 | 0.704294 | 0.126035 | 0.259495 | 0.609316 | 0.798641 | 1.567897 | 1.095793 | 0.928057 | 1.181302 | 1.163358 | 0.943776  | 46.00449 | 37.23372 | 19.12677 | 21.26595 | 24.18649 | 26.69673  | 102.8043  | 18.95333 |          |
| 3-4-Dihydroxybenzoic acid | 1.172194 | 1.113867 | 1.014927 | 1.223181 | 0.910889 | 1.208731 | 28.64145 | 30.58277 | 10.9239  | 15.10883 | 21.8518  | 22.1552  | 51.84715 | 19.12645 | 0.126997 | 0.138671 | 0.143502 | 0.143502 | 0.143502 | 0.143502  | 0.143502 | 0.143502 | 0.143502 | 0.143502 | 0.143502 | 0.143502  | 0.143502  | 0.143502 | 0.143502 |
| 3-Hydroxyanthranilic acid | 1.026697 | 1.060217 | 1.001248 | 1.089434 | 1.04408  | 1.00878  | 26.79905 | 18.81633 | 19.74591 | 18.08636 | 19.95486 | 19.14106 | 26.84636 | 14.80927 | 0.95118  | 1.088787 | 0.787894 | 1.082024 | 0.912681 | 0.965807  | 3.793238 | 3.146366 | 2.36418  | 2.060512 | 2.686854 | 21.76766  | 19.07912  | 24.83204 |          |
| 3-Hydroxybutyrate         | 1.29633  | 1.367583 | 0.984276 | 1.073511 | 0.897426 | 0.942064 | 0.901275 | 0.28191  | 0.652343 | 0.569709 | 0.429141 | 0.051004 | 0.480196 | 0.145091 | 1.08638  | 1.001734 | 0.998855 | 1.021134 | 1.02338  | 1.061392  | 3.712635 | 4.958445 | 2.346522 | 1.663233 | 2.817006 | 2.308722  | 4.189588  | 2.226406 |          |
| 3-Hydroxyphenyllactate    | 1.172194 | 1.113867 | 1.014927 | 0.972483 | 1.019889 | 1.208731 | 15.10209 | 19.25218 | 10.9239  | 15.10883 | 21.8518  | 22.1552  | 51.84715 | 14.71815 | 1.017722 | 0.899577 | 0.924959 | 1.034411 | 1.046103 | 0.991635  | 5.772328 | 4.920322 | 5.281836 | 5.895726 | 7.91818  | 12.25322  | 173.1731  | 13.17701 |          |
| 3-Methoxytyramine         | 0.875031 | 1.221796 | 0.875031 | 0.925716 | 1.09111  | 0.999994 | 4.226669 | 2.801733 | 1.83089  | 1.849616 | 15.09129 | 8.366506 | 12.75307 | 15.72894 | 1.145622 | 1.286999 | 1.289326 | 1.180556 | 1.623442 | 1.742377  | 0.248174 | 0.146811 | 0.112742 | 0.113419 | 0.402656 | 0.513889  | 0.490242  | 0.808276 |          |
| 3-phenylpropionic acid    | 0.988014 | 1.025181 | 1.348046 | 1.152168 | 0.750132 | 1.151192 | 93.5696  | 100.4617 | 38.59135 | 58.18519 | 67.31443 | 101.5028 | 231.5031 | 93.57599 | 0.988014 | 1.025181 | 1.348046 | 1.152168 | 0.750132 | 1.151192  | 93.5696  | 100.4617 | 38.59135 | 58.18519 | 67.31443 | 101.5028  | 231.5031  | 93.57599 |          |
| 4-Methylvaleric acid      | 1.313034 | 0.870953 | 1.44106  | 0.860363 | 1.365749 | 0.856563 | 0.805023 | 0.570602 | 0.743672 | 0.663031 | 0.768236 | 0.631804 | 0.730921 | 0.30818  | 0.899313 | 1.029407 | 0.892175 | 1.017466 | 0.928209 | 0.927221  | 136.7145 | 73.03488 | 54.18608 | 64.94624 | 82.24853 | 74.45244  | 109.1637  | 93.88119 |          |
| 4-Pyridoxic acid          | 1.042474 | 0.910018 | 0.979317 | 1.078127 | 0.943036 | 1.032562 | 20.14808 | 29.93338 | 24.42739 | 20.72566 | 29.91356 | 17.21874 | 39.34869 | 55.75441 | 0.966614 | 0.859988 | 0.864301 | 0.99145  | 1.475354 | 1.421035  | 45.07122 | 24.70797 | 6.437232 | 9.223331 | 24.26249 | 18.60317  | 74.85401  | 4.616194 |          |
| 5-Hydroxylsine            | 1.117121 | 0.777666 | 0.965698 | 0.957495 | 0.899764 | 0.807761 | 10.13728 | 8.316299 | 6.53645  | 9.530705 | 2.65962  | 5.340023 | 7.408163 | 2.943555 | 1.067325 | 1.347234 | 1.054822 | 0.955283 | 0.875391 | not measu | 0.233906 | 0.25052  | 0.25349  | 0.360982 | 0.288172 | not measu | not measu | 0.149789 |          |
| 5-Methyltyrosine          | 1.03611  | 1.087499 | 0.895908 | 0.916626 | 0.895593 | 0.899196 | 0.704646 | 0.190852 | 0.667635 | 0.738406 | 0.209756 | 1.772528 | 0.791485 | 0.535249 | 0.957615 | 1.080968 | 0.924326 | 0.97823  | 0.893287 | 0.955692  | 1.131416 | 1.298174 | 2.796983 | 2.561306 | 1.615304 | 1.337427  | 0.581092  | 1.268312 |          |
| acetoacetate              | 0.951607 | 0.77092  | 0.966479 | 1.042499 | 0.901834 | 1.005083 | 1.447909 | 1.160303 | 1.304133 | 0.912901 | 0.448023 | 0.445283 | 0.350237 | 0.473195 | 0.946689 | 0.735397 | 0.969605 | 1.048429 | 0.876646 | 0.737748  | 1.280037 | 11.78817 | 26.23904 | 24.52884 | 19.55298 | 32.42285  | 12.82307  | 22.47903 |          |
| acetyl carnitine C2       | 1.05657  | 1.035731 | 0.979366 | 0.952976 | 1.139123 | 0.99192  | 36.80538 | 51.02    | 61.55419 | 68.54207 | 4.521202 | 50.93696 | 3.645776 | 2.541306 | 0.968416 | 0.811552 | 1.030276 | 0.996315 | 0.917722 | 0.936927  | 23.4622  | 13.76386 | 15.91393 | 14.539   | 18.46699 | 19.76733  | 7.773172  | 27.69318 |          |
| acetyllysine              | 0.823422 | 0.895289 | 0.938585 | 1.046562 | 1.030033 | 1.11225  | 16.12039 | 33.94574 | 18.1516  | 16.8679  | 55.75337 | 45.60275 | 93.2001  | 83.06126 | 0.250742 | 0.159826 | 0.903685 | 0.940262 | 0.094527 | 0.305757  | 1.922345 | 1.083417 | 0.3746   | 1.05442  | 1.085332 | 0.687394  | 1.240488  |          |          |
| acetic acid               | 1.180238 | 1.14626  | 1.033366 | 1.018845 | 1.165023 | 1.199214 | 1.739732 | 1.067429 | 2.71359  | 2.22532  | 0.739855 | 0.717878 | 0.691273 | 1.202943 | 1.050631 | 1.019154 | 0.940226 | 0.984986 | 0.947744 | 0.798981  | 0.173965 | 0.079845 | 0.069006 | 0.135099 | 0.119753 | 0.169821  | 0.144108  |          |          |
| alpha-ketoglutarate       | 1.085628 | 0.840808 | 1.286713 | 1.573438 | 1.273107 | 1.165866 | 0.057371 | 0.04041  | 0.035688 | 0.021329 | 0.03379  | 0.00161  | 0.055597 | 0.011193 | 0.926266 | 0.       |          |          |          |           |          |          |          |          |          |           |           |          |          |

|                               |          |          |           |          |          |          |          |          |           |           |          |          |          |          |
|-------------------------------|----------|----------|-----------|----------|----------|----------|----------|----------|-----------|-----------|----------|----------|----------|----------|
| carbamoyl phosphate           | 0.850866 | 0.778708 | 0.997141  | 0.988979 | 0.992018 | 0.976711 | 0.489642 | 0.532229 | 0.430795  | 0.58545   | 0.382276 | 0.377177 | 0.105331 | 0.209678 |
| carnitine                     | 0.886206 | 1.048926 | 0.894809  | 0.990461 | 0.953578 | 0.89466  | 0.918436 | 0.305381 | 0.534992  | 0.409237  | 0.610291 | 0.232626 | 0.295439 | 0.188564 |
| carnosine                     | 0.901266 | 0.916845 | 0.914092  | 1.011949 | 0.949417 | 0.813441 | 43.53391 | 34.65634 | 18.45641  | 15.18758  | 38.48067 | 28.96621 | 33.82537 | 53.34048 |
| catechol sulfate              | 2.256298 | 1.545299 | 1.142204  | 1.043758 | 1.134294 | 1.049272 | 0        | 0.02784  | 0         | 0.02993   | 0        | 0.014766 | 0.022203 | 0.027803 |
| cholesterol sulfate           | 0.961864 | 1.168779 | 1.011029  | 1.090425 | 1.104402 | 1.053181 | 13.83875 | 21.58948 | 129.0271  | 143.475   | 66.95084 | 13.48476 | 14.91772 | 9.008516 |
| cinnamoylglycine              | 1.020597 | 1.029317 | 0.990223  | 1.08204  | 0.912475 | 1.053121 | 12.7568  | 6.614035 | 7.051315  | 5.73683   | 4.95072  | 3.379765 | 3.84139  | 4.606307 |
| citramalic acid               | 1.472924 | 1.216726 | 1.1625    | 1.167575 | 1.082327 | 1.278089 | 48.64074 | 35.88501 | 46.11074  | 50.804    | 8.559878 | 157.168  | 155.6375 | 409.467  |
| citrate                       | 1.011764 | 1.00404  | 1.029146  | 0.963801 | 0.925598 | 0.867568 | 0.04245  | 0.030749 | 0.042515  | 0.033437  | 0.045451 | 0.038885 | 0.046503 | 0.048633 |
| citrulline                    | 1.072036 | 1.046529 | 0.98132   | 1.026662 | 0.849597 | 0.812791 | 0.414595 | 0.295432 | 0.134919  | 0.104789  | 0.140467 | 0.121365 | 0.18592  | 0.137625 |
| creatine                      | 0.997694 | 1.013948 | 1.003567  | 0.968016 | 0.886693 | 1.0188   | 66.14179 | 63.98335 | 34.95281  | 29.1077   | 42.80995 | 36.4575  | 55.632   | 68.84508 |
| creatinine                    | 1.341149 | 1.505607 | 0.91498   | 0.921349 | 1.141478 | 1.274631 | 14.14715 | 10.28886 | 15.59324  | 21.07448  | 28.44213 | 14.98624 | 15.57183 | 8.287016 |
| croscin                       | 0.877916 | 0.944486 | 0.91372   | 1.002324 | 0.875855 | 0.833758 | 5.971226 | 7.390852 | 10.43123  | 9.13189   | 21.31484 | 15.81094 | 11.17204 | 12.76929 |
| croscin sulfate               | 1.146328 | 1.036719 | 1.52392   | 0.998186 | 0.921926 | 1.155636 | 0.046687 | 0.069477 | 0.09438   | 0.045741  | 0.026157 | 0.096745 | 0.213482 | 0.152522 |
| cystine                       | 1.182182 | 1.116877 | 1.06255   | 0.926443 | 1.069357 | 0.897069 | 0.449025 | 0.289357 | 0.057777  | 0.05902   | 0.980623 | 0.586322 | 1.085152 | 0.467033 |
| cytidine                      | 1.002055 | 0.944626 | 1.001476  | 0.973185 | 0.951009 | 0.911707 | 0.450999 | 0.091227 | 0.191633  | 0.162394  | 0.033454 | 1.289617 | 0.240925 | 1.097963 |
| D-2-Aminobutyric acid         | 0.643491 | 0.904735 | 0.918073  | 0.988475 | 0.948332 | 0.980721 | 0.551745 | 0.240098 | 0.331144  | 0.092261  | 0        | 0        | 0.033516 | 0.072008 |
| decanoyl carnitine C10        | 0.766621 | 0.951127 | 0.878496  | 1.382574 | 0.894965 | 1.375206 | 0.232272 | 0.222608 | 0         | 0.689285  | 0        | 0.222608 | 0.386259 | 0.345846 |
| decanoyl carnitine C10:1      | 0.462846 | 1.024693 | 0.370466  | 0.766604 | 1.140802 | 0.809793 | 0.101585 | 0.138633 | 0.122242  | 0.534748  | 0.012838 | 0.036502 | 0.248506 | 0.821849 |
| dehydroascorbic acid          | 0.968416 | 0.808679 | 1.030276  | 0.995504 | 0.916229 | 0.93605  | 17.95252 | 15.83562 | 15.02768  | 14.00888  | 16.05315 | 19.95698 | 7.834799 | 18.68348 |
| dehydrocortic acid            | 2.158838 | 1.211275 | 1.270061  | 1.118243 | 1.07898  | 0.954239 | 0        | 0.040417 | 0         | 0         | 0        | 0        | 0.01787  | 0.010874 |
| deoxycholic acid              | 1.224237 | 1.086559 | 1.078136  | 0.889574 | 0.913961 | 1.13298  | 0.30818  | 0        | 0.164382  | 0.149303  | 1.230596 | 1.057653 | 1.098807 | 1.230972 |
| deoxyglycine                  | 1.218874 | 0.906612 | 0.40662   | 0.93076  | 0.624473 | 0.863239 | 81.00647 | 152.477  | 35.2042   | 21.26992  | 39.39661 | 92.06023 | 74.7954  | 157.6276 |
| deoxyinosine                  | 1.126438 | 1.326182 | 1.051864  | 1.105046 | 1.266776 | 1.233847 | 0.499944 | 0.246328 | 0.152891  | 0         | 0.654874 | 0        | 0.573581 | 0.348509 |
| deoxyuridine                  | 0.940185 | 1.12999  | 1.19272   | 1.111888 | 1.173087 | 1.680805 | 51.07622 | 22.5702  | 58.09719  | 62.63836  | 135.4643 | 141.5218 | 177.9224 | 144.1844 |
| D-Galactonic acid             | 0.940185 | 1.12999  | 1.19272   | 1.111888 | 1.173087 | 1.680805 | 51.07622 | 22.5702  | 58.09719  | 62.63836  | 135.4643 | 141.5218 | 177.9224 | 144.1844 |
| D-Glucuronate                 | 1.03472  | 0.974632 | 1.201222  | 0.907978 | 0.923297 | 1.007257 | 0.471826 | 4.923228 | 4.288048  | 3.278159  | 12.27783 | 5.842334 | 11.67177 | 3.947939 |
| diaminopimelic Acid           | 1.50166  | 1.041027 | 1.211912  | 0.924799 | 1.118651 | 0.968093 | 7.296998 | 9.171353 | 8.23395   | 5.409742  | 8.146398 | 9.808868 | 12.3453  | 5.85249  |
| diacylglycerol                | 0.820267 | 0.998285 | 0.867374  | 0.943711 | 0.917183 | 0.938443 | 15.14617 | 7.636948 | 8.583148  | 12.69235  | 13.2633  | 13.68371 | 14.37539 |          |
| dihydroxybenzoic acid         | 1.002055 | 0.944626 | 0.985864  | 0.973185 | 0.933638 | 0.932942 | 0.150999 | 0.091227 | 0.175522  | 0.078077  | 0.133215 | 0.250838 | 0.044305 | 0.922079 |
| dimethylglycine               | 1.397847 | 1.122143 | 1.04812   | 0.877185 | 0.897917 | 0.707072 | 29.20896 | 8.420242 | 8.534582  | 11.81482  | 21.65176 | 48.07147 | 37.57157 | 12.23052 |
| DL-3-4-Dihydroxymandelic acid | 1.245823 | 1.32241  | 0.84882   | 1.449612 | 1.219689 | 1.031917 | 15.29186 | 13.38416 | 6.784358  | 7.785747  | 12.09147 | 10.24482 | 7.545793 | 6.905201 |
| decanoyl carnitine C12:1      | 0.507776 | 0.693279 | 0.929843  | 1.039652 | 1.054563 | 0.874239 | 0        | 0.659566 | 0.303874  | 0         | 0.111171 | 0.030657 | 0.030847 |          |
| D-Phenylallic acid            | 1.32516  | 1.011524 | 0.987146  | 0.955196 | 0.96821  | 1.04509  | 27.95856 | 8.01026  | 3.582252  | 3.883408  | 3.377495 | 4.468986 | 3.414969 | 1.905907 |
| equol sulfate                 | 1.245599 | 1.006118 | 0.901826  | 1.013766 | 0.632169 | 0.473831 | 4.651551 | 7.696225 | 5.145792  | 6.072188  | 7.507106 | 9.427235 | 6.886024 | 42.46353 |
| fumarate                      | 1.375542 | 1.500039 | not measu | 1.282537 | 1.281648 | 1.151089 | 4.497116 | 3.215404 | not measu | not measu | 6.741175 | 3.525921 | 5.151527 | 5.329499 |
| fumarate                      | 1.335398 | 1.095409 | 1.121108  | 1.066188 | 1.174807 | 1.092556 | 3.449791 | 2.66019  | 4.738248  | 3.809163  | 1.900375 | 1.834085 | 0.982025 | 1.124652 |
| galacturonic acid             | 1.042474 | 1.163966 | 0.953856  | 1.067227 | 1.080181 | 1.032562 | 32.15208 | 29.93338 | 24.42739  | 24.33434  | 62.15301 | 55.83705 | 82.06275 | 55.75441 |
| gamma-Butyrobetaine           | 0.951607 | 0.784649 | 0.975276  | 1.013568 | 0.903184 | 1.005085 | 2.582396 | 0.918271 | 0.508642  | 1.099181  | 0.625209 | 0.462243 | 0.354862 | 0.629601 |
| glycolactone                  | 0.941051 | 0.860075 | 1.022541  | 1.161642 | 1.290509 | 1.717964 | 22.30708 | 69.8624  | 59.42066  | 77.55433  | 195.3611 | 121.6651 | 39.07729 |          |
| glucosamine                   | 1.032891 | 0.838235 | 0.982168  | 0.996344 | 0.910293 | 0.898146 | 0.428096 | 0.268238 | 0.563827  | 0.483743  | 0.336893 | 0.952122 | 0.148419 | 0.610623 |
| glucose                       | 0.970717 | 0.953881 | 0.872434  | 0.899342 | 0.820668 | 0.84375  | 0.167105 | 0.111844 | 0.141599  | 0.10194   | 0.083762 | 0.118058 | 0.316163 | 0.220683 |
| glutamate                     | 1.151632 | 1.003981 | 1.02961   | 0.842766 | 0.999638 | 0.70563  | 0.741582 | 0.449019 | 0.159777  | 0.196366  | 0.193639 | 0.170554 | 0.112541 | 0.227665 |
| glutamine                     | 0.814459 | 0.883466 | 0.927823  | 0.967351 | 0.851024 | 1.222027 | 0.141582 | 0.087039 | 0.07836   | 0.061478  | 0.094042 | 0.075172 | 0.110067 | 0.124046 |
| glycerate                     | 1.317354 | 1.009318 | 1.142108  | 0.895498 | 1.231902 | 1.005277 | 4.131258 | 4.332591 | 5.312497  | 5.577793  | 3.661079 | 2.866816 | 2.584296 | 2.441243 |
| glycerol-3-phosphate          | 0.94295  | 0.993107 | 1.152751  | 1.090749 | 0.707998 | 0.69064  | 4.671388 | 6.235501 | 2.597769  | 1.165821  | 8.612764 | 7.444732 | 9.209408 | 10.82368 |
| glycine                       | 1.018289 | 1.090928 | 1.035196  | 0.981869 | 0.866347 | 0.973786 | 0.358997 | 0.260292 | 0.219663  | 0.184288  | 0.314367 | 0.262486 | 0.247809 | 0.258408 |
| glycolcholic acid             | 2.172114 | 1.338547 | 1.167973  | 1.020537 | 1.188019 | 0.81756  | 0.109415 | 0.066812 | 0.061762  | 0.036032  | 0        | 0        | 0.024492 | 0.01908  |
| glycodeloxycholic acid        | 1.150689 | 1.122783 | 0.925996  | 0.784495 | 0.688829 | 0.804152 | 0        | 0.02129  | 0         | 0         | 0        | 0        | 0.029337 | 0.071358 |
| glycyl-L-proline              | 0.656656 | 1.058595 | 0.809944  | 1.084755 | 1.175271 | 0.892152 | 6.69446  | 4.00418  | 1.292496  | 2.38108   | 18.48045 | 16.16703 | 0.699944 | 12.51865 |
| glycylsarcosine               | 1.104237 | 1.050087 | 1.208231  | 1.029686 | 1.091888 | 1.399589 | 2.756399 | 2.190227 | 1.366273  | 1.196132  | 2.896865 | 2.783739 | 4.31665  | 2.077199 |
| guanine                       | 1.897797 | 1.746418 | 1.561098  | 1.215498 | 2.646293 | 1.795948 | 2.726426 | 1.99491  | 26.39354  | 22.64262  | 13.7677  | 9.102207 | 6.878765 | 9.66606  |
| guanosine                     | 1.327119 | 1.052766 | 1.130126  | 1.199369 | 1.444344 | 1.886311 | 0.545118 | 0.474002 | 0.16862   | 0.336621  | 0.115115 | 0.064866 | 0.235313 | 0.181571 |
| hexadecenyl carnitine C16:1   | 0.718918 | 0.575288 | 1.023198  | 1.390696 | 1.173014 | 1.031641 | 0.078369 | 0.006139 | 0.014556  | 0.012561  | 0        | 0.02543  | 0        | 0.023559 |
| hexanoyl carnitine C6         | 1.578677 | 0.945261 | 0.811104  | 0.988338 | 0.934958 | 0.872698 | 0.185353 | 0.395646 | 0.217956  | 0.419841  | 0.194554 | 0.239685 | 0.76095  | 0.847548 |
| hippuric acid                 | 0.87473  | 0.820158 | 1.031765  | 1.124104 | 1.081278 | 0.75287  | 10.46496 | 5.123831 | 21.9461   | 13.25308  | 35.67563 | 28.92359 | 18.11921 | 128.6214 |
| homocysteine                  | 0.767388 | 0.808065 | 1.00351   | 0.941473 | 1.017866 | 1.025929 | 0.329718 | 0.287596 | 0.176677  | 0.168849  | 0.141207 | 0.144653 | 0.164196 | 0.274842 |
| homocarnosine                 | 0.705281 | 0.71324  | 0.928312  | 1.06348  | 0.912445 | 1.0554   | 0.793413 | 0.813357 | 0.56159   | 0.665556  | 0.29002  | 0.441738 | 0.390333 | 0.124862 |
| homocitulline                 | 0.87553  | 0.734902 | 0.903612  | 0.960927 | 0.963723 | 1.086785 | 2.183568 | 3.114712 | 3.136123  | 2.63401   | 2.294574 | 2.407985 | 3.190255 | 2.252105 |
| homocysteric acid             | 1.276821 | 0.924155 | 0.951967  | 0.983243 | 0.806631 | 0.977017 | 0.944305 | 0.72736  | 0.783091  | 0.667671  | 0.83088  | 0.725819 | 0.296904 | 0.430043 |
| homocysteine                  | 0.989759 | 1.105124 | 0.874623  | 0.809506 | 0.904077 | 1.051103 | 0.10577  | 0.048804 | 0.054761  | 0.045282  | 0.088174 | 0.018273 | 0.105683 | 0.084759 |
| homogentisic acid             | 1.01834  | 1.31982  | 0.924668  | 1.040857 | 0.883902 | 1.09012  | 9.852099 | 11.92869 | 6.958963  | 5.103657  | 1.740733 | 3.527466 | 5.666792 | 3.917936 |
| hydroquinone                  | 0.843619 | 1.027814 | 0.930212  | 0.886095 | 0.898867 | 0.946368 | 19.08473 | 16.10589 | 7.852523  | 9.088395  | 13.77029 | 13.49367 | 13.40885 | 14.25087 |
| hydroxyindoleacetic acid      | 0.985655 | 1.337028 | 1.297465  | 0.794771 | 0.966517 | 0.508195 | 110.5031 | 87.8774  | 67.30644  | 52.5395   | 85.92003 | 74.50721 | 79.43449 | 58.38252 |
| hydroxyphenyllactic acid      | 1.670171 | 1.024137 | 1.297465  | 0.927483 | 0.953932 | 1.27095  | 42.03248 | 15.6594  | 10.15322  | 5.830435  | 6.830764 | 7.122862 | 21.73863 | 13.47979 |
| hydroxyphenylpyruvate         | 1.35263  | 1.957391 | 0.94882   | 0.955473 |          |          |          |          |           |           |          |          |          |          |



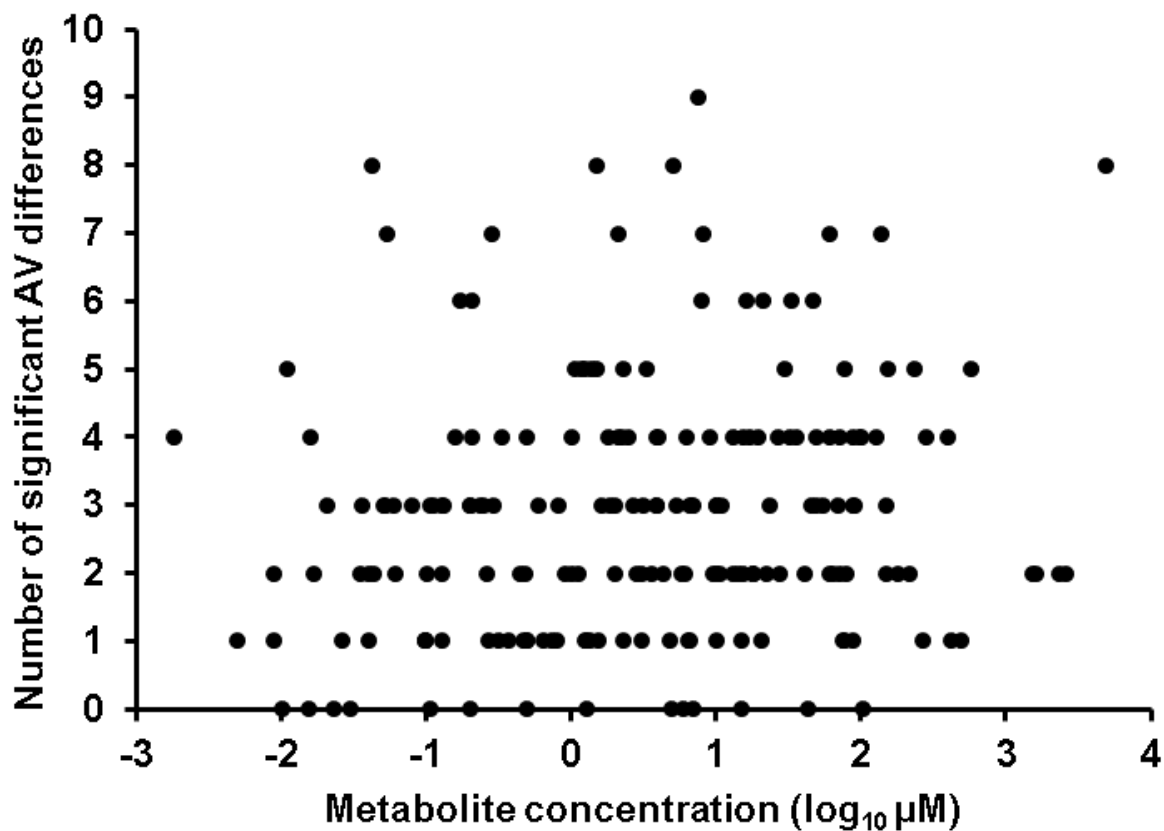

**Figure S1.** The correlation between the number of significant AV differences detected per metabolite and the metabolite's absolute concentration. Related to Fig.1.



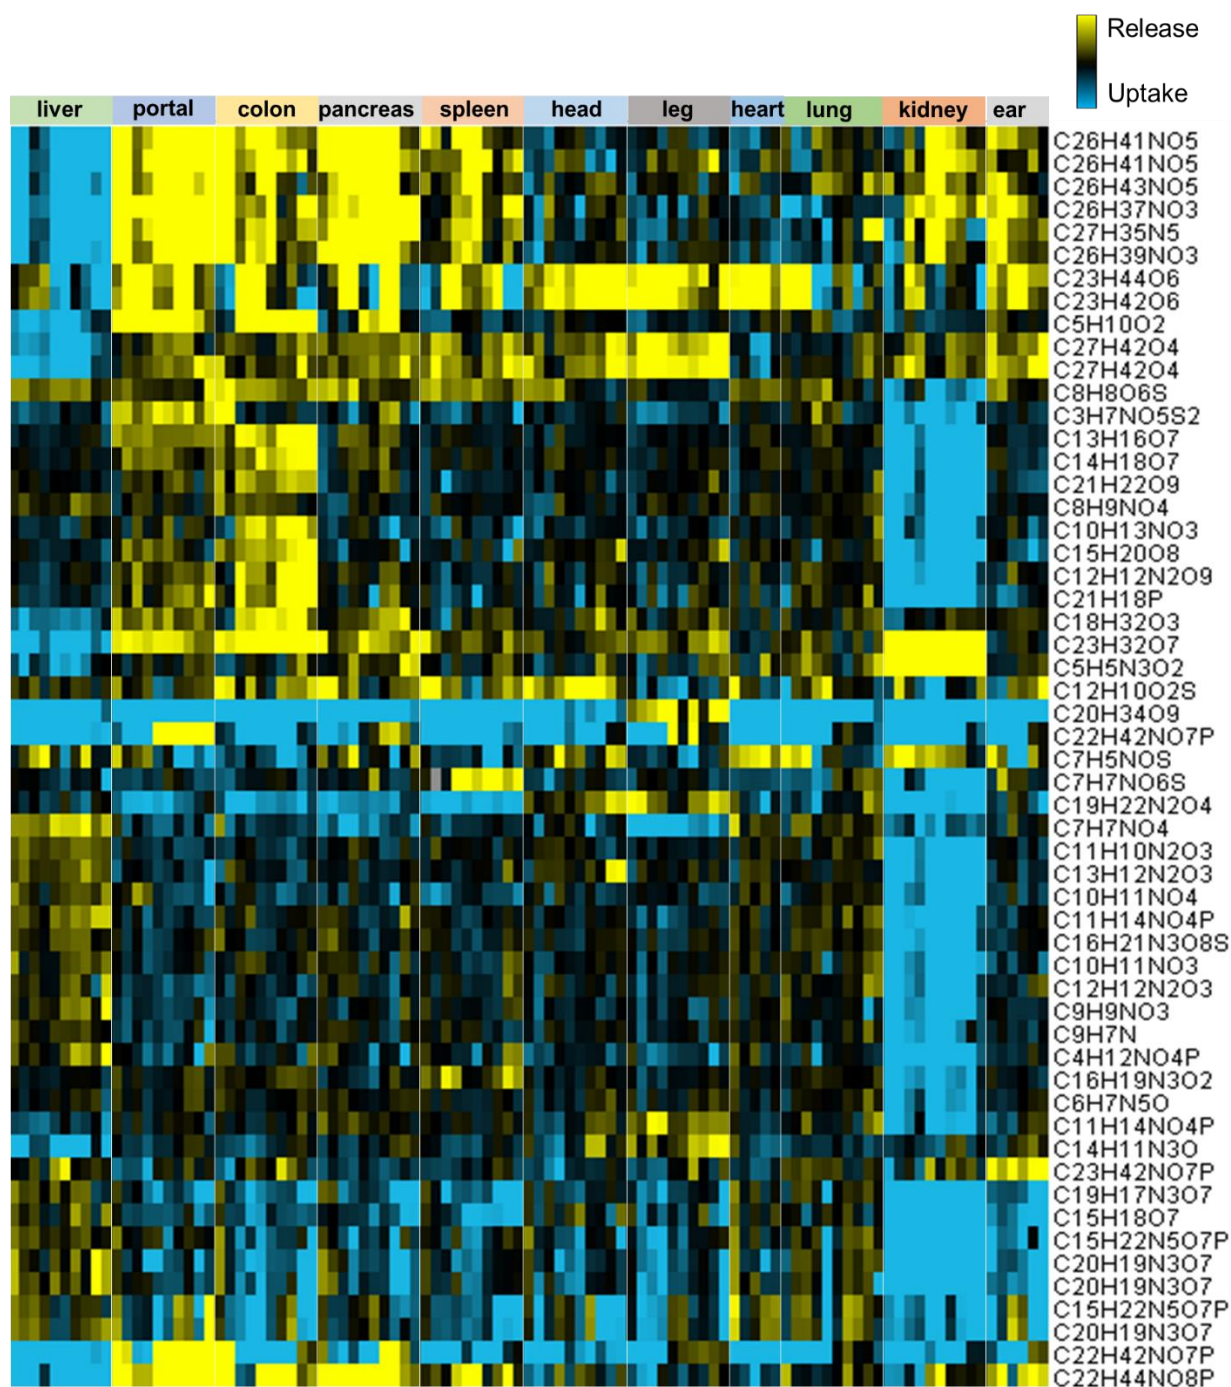

Figure S2. Unknown metabolites showing significant inter-organ exchange. Related to Fig.1.

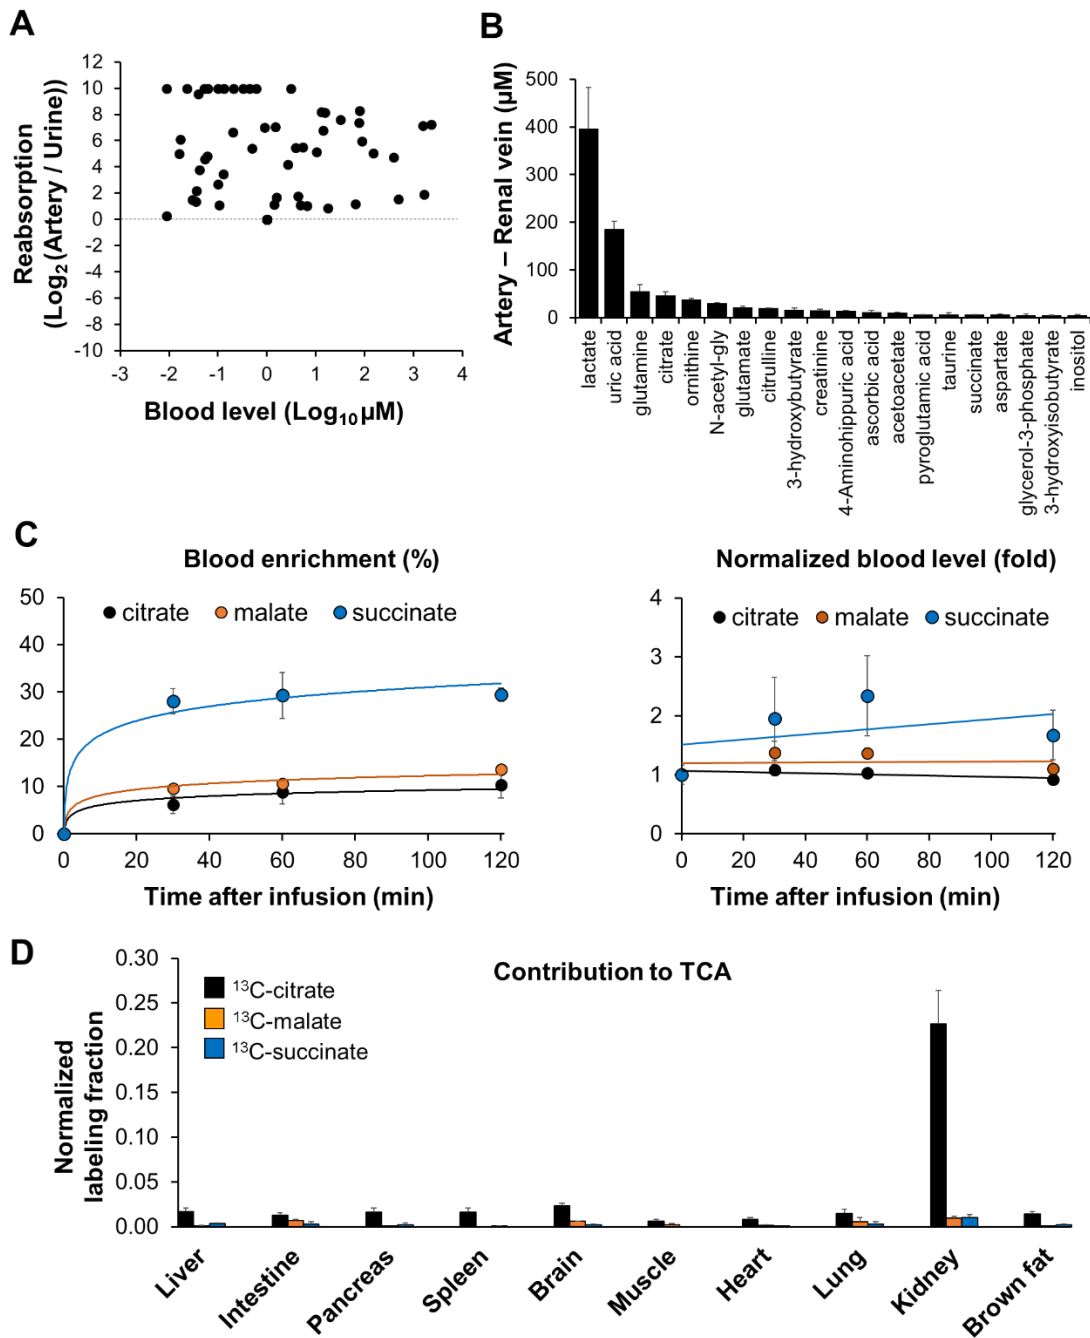

**Figure S3. Renal metabolite uptake in pigs (A and B) and steady-state infusion of  $^{13}\text{C}$ -labeled TCA intermediate tracers in mice (C and D).** The reporter metabolite (measured to determine TCA labeling) was selected to be distinct from the tracer metabolite, to avoid misinterpreting extracellular tracer as TCA labeling (in practice, we observe an additional 1% to 8% TCA contribution, depending on the tissue, when the reporter metabolite and tracer are the same). Specifically, for  $^{13}\text{C}$ -citrate and  $^{13}\text{C}$ -malate infusions, tissue succinate labeling was used to determine their TCA contribution. For  $^{13}\text{C}$ -succinate infusion, tissue malate labeling was used. Data are means and error bars are standard errors. N = 4 for citrate, and N = 3 for malate and succinate. Related to Fig.2.

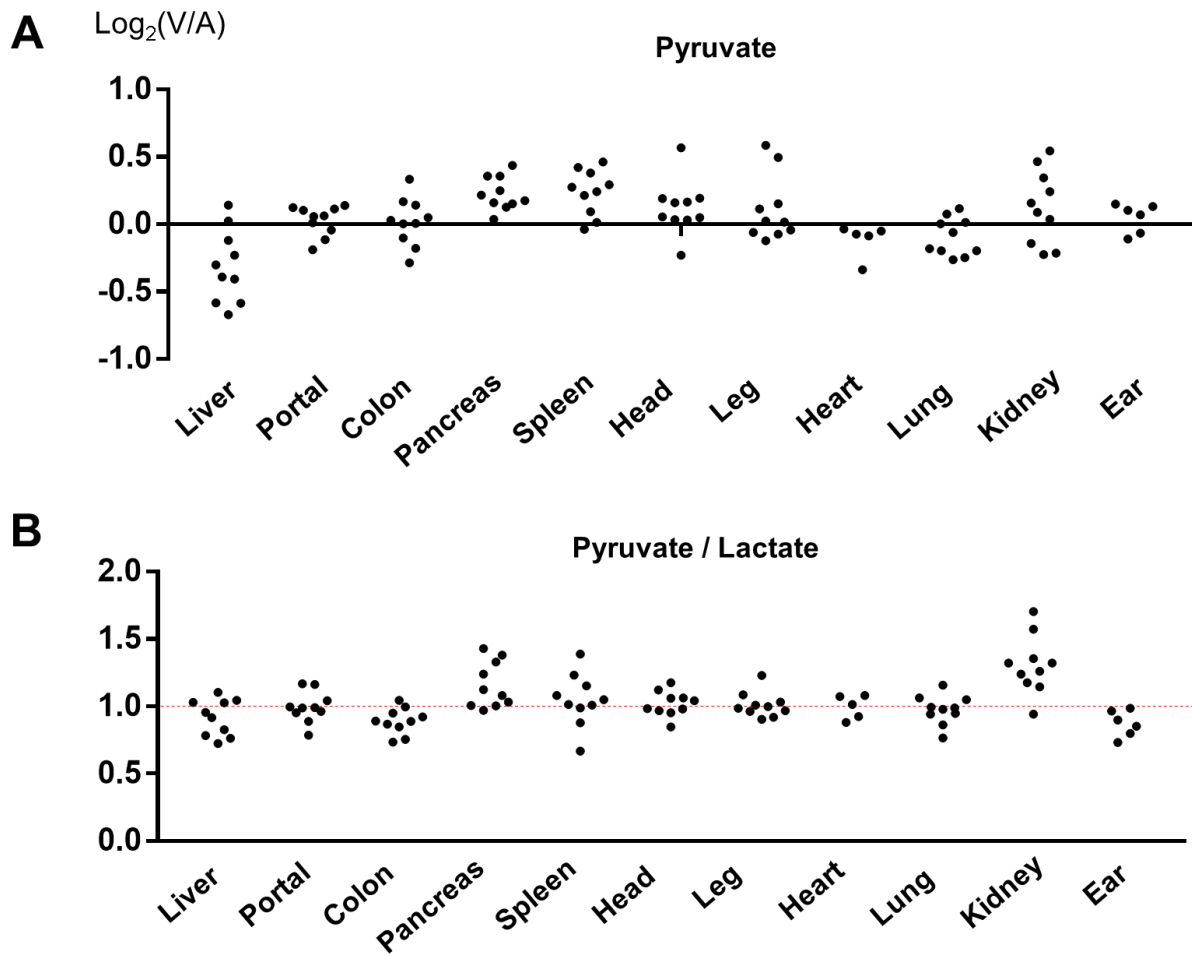

**Figure S4. Kidneys oxidize circulating lactate into circulating pyruvate in pigs.** Related to Fig. 3.

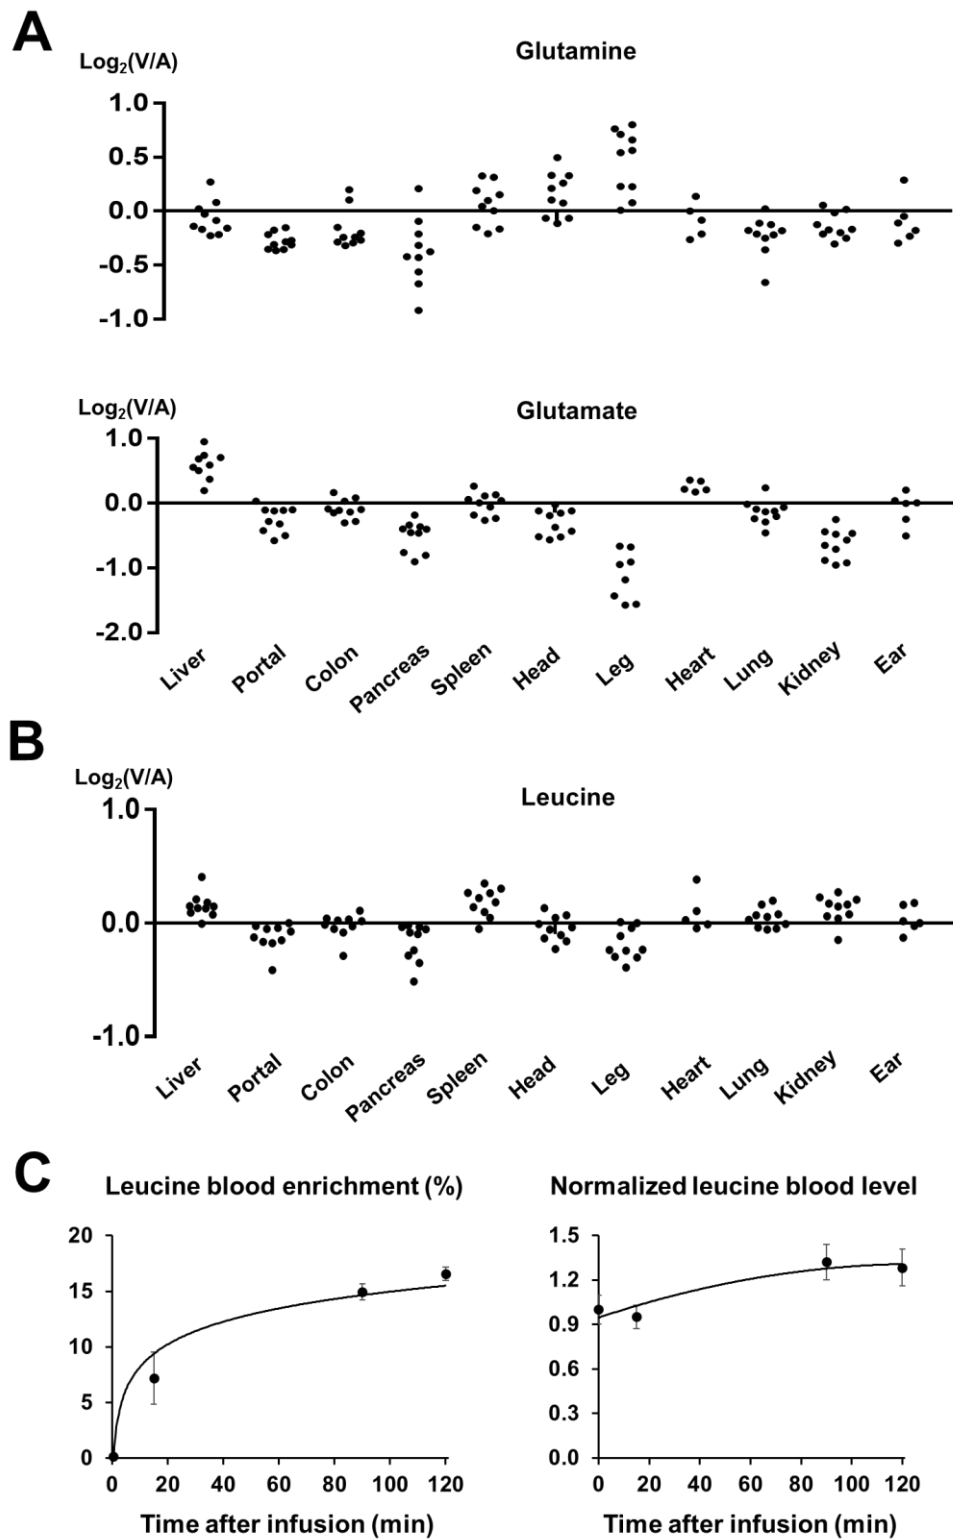

**Figure S5. Exchange of amino acids in pigs (A and B), and steady-state infusion of a <sup>13</sup>C-leucine tracer in mice (C). Data are means and error bars are standard errors (N = 4 mice). Related to Fig. 4.**

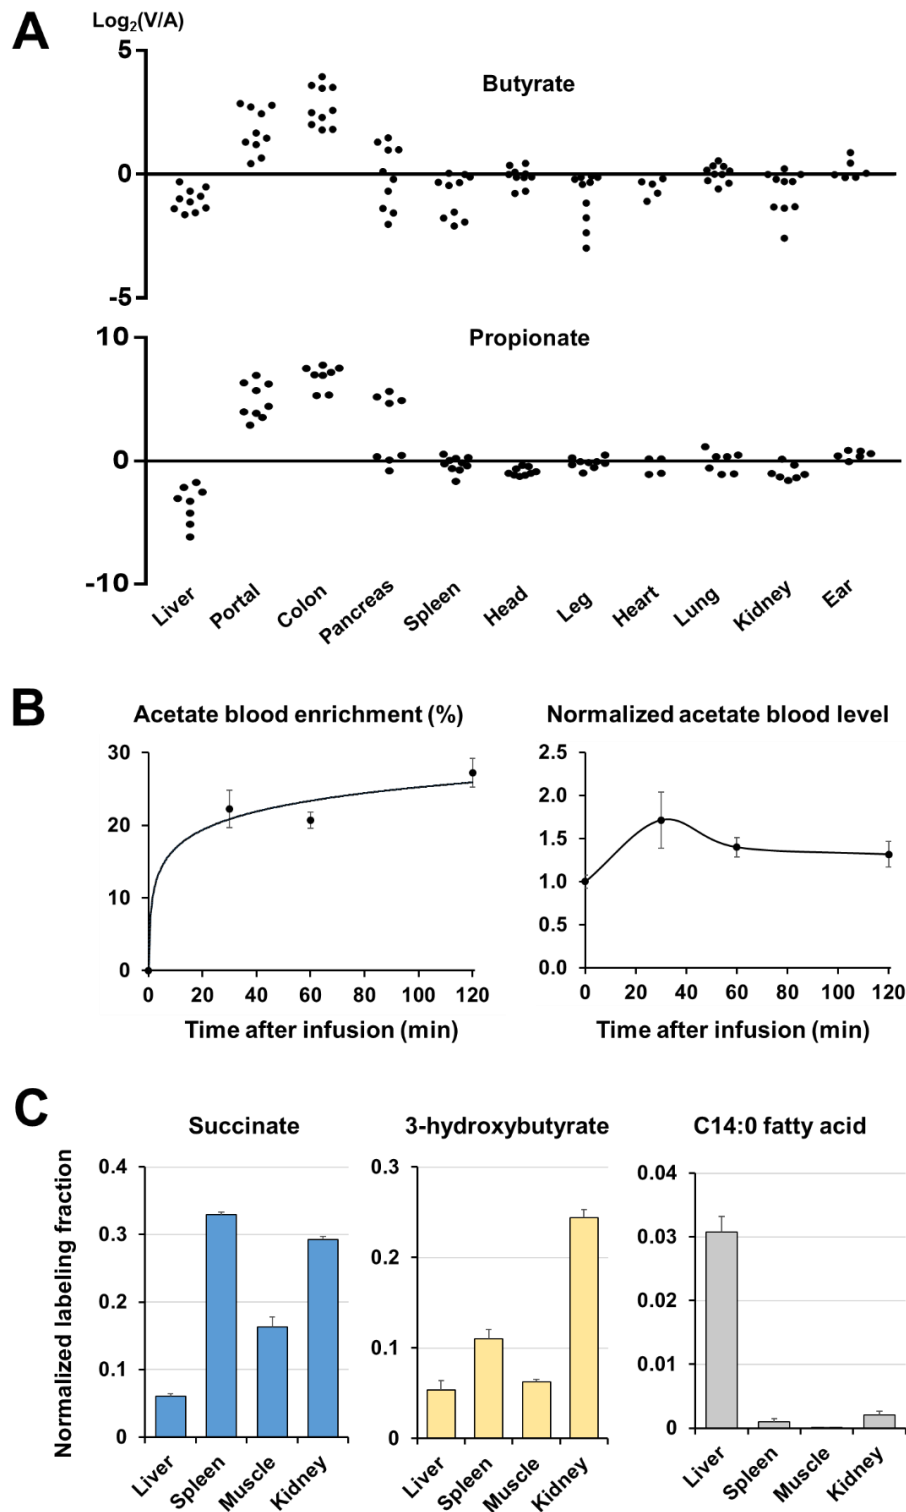

**Figure S6. Short chain fatty acid exchange in pigs (A) and steady-state infusion of a  $^{13}\text{C}$ -acetate tracer in mice (B and C). Data are means and error bars are standard errors (N = 3 mice). Related to Fig. 5.**

| Metabolites                            | Produced                                      | Consumed                                      |
|----------------------------------------|-----------------------------------------------|-----------------------------------------------|
| Secondary bile acids                   | Intestine, Colon                              | Liver                                         |
| Acetate                                | Intestine, Colon, Head                        | Liver, Spleen, Leg                            |
| Butyrate, Propionate                   | Intestine, Colon                              | Liver                                         |
| Ribonucleosides                        | Spleen                                        | Kidneys                                       |
| Deoxyribonucleosides                   | Colon, Spleen                                 | Kidneys                                       |
| Glucose                                | Liver, Kidneys                                | Intestine, Colon, Pancreas, Spleen, Head, Leg |
| Lactate                                | Spleen, Ear                                   | Liver, Kidneys                                |
| Pyruvate                               | Pancreas, Spleen                              | Heart                                         |
| 3-hydroxybutyrate                      | Colon                                         | Leg, Lung, Kidneys                            |
| Acetoacetate                           | Liver                                         | Pancreas, Spleen, Leg, Lung, Kidneys          |
| Malate, Fumarate, $\alpha$ -KG         | Intestine, Colon, Pancreas, Spleen, Leg, Ear  | Liver, Kidneys                                |
| Succinate                              | Intestine, Colon, Pancreas, Leg               | Liver, Kidneys                                |
| Citrate                                | Pancreas, Head, Leg                           | Kidneys                                       |
| Indole metabolites                     | Intestine, Colon                              | Kidneys                                       |
| Taurine                                | Liver, Spleen, Ear                            | -                                             |
| Inositol                               | Liver, Spleen                                 | Kidneys                                       |
| Serine                                 | Kidneys, Liver                                | Intestine, Pancreas, Head, Leg, Ear           |
| Aspartate                              | Liver, Spleen                                 | Leg, Kidneys                                  |
| Asparagine                             | Spleen                                        | Intestine, Pancreas                           |
| Glutamate                              | Liver, Heart                                  | Intestine, Pancreas, Head, Leg, Kidneys       |
| Glutamine                              | Leg                                           | Intestine, Pancreas, Lung, Kidneys            |
| Alanine                                | Leg                                           | Colon                                         |
| Branched-chain amino acids             | Liver                                         | Intestine, Leg                                |
| Other essential amino acids            | Liver, Kidneys                                | Intestine, Pancreas                           |
| Branched-chain $\alpha$ -keto acids    | Leg                                           | Intestine, Colon, Spleen                      |
| Branched-chain $\alpha$ -hydroxy acids | Leg                                           | Kidneys                                       |
| N-acetyl-amino acids                   | Liver, Spleen                                 | Kidneys                                       |
| Unsaturated fatty acids (C14-C20)      | Intestine, Colon, Pancreas, Spleen, Head, Leg | Liver, Heart                                  |
| Unsaturated fatty acids (C22)          | Intestine, Spleen, Leg                        | Liver, Heart                                  |
| Unsaturated fatty acids (C24)          | Spleen                                        | Liver, Heart                                  |
| Saturated fatty acids (C14-C20)        | -                                             | Heart                                         |
| Saturated fatty acids (C22-C24)        | -                                             | Head, Leg, Lung                               |
| Carnitine                              | -                                             | Intestine, Colon, Spleen                      |
| Short-chain carnitines (C2-C5)         | Colon, Heart                                  | Spleen, Leg, Kidneys                          |
| Medium-chain carnitines (C6-C12)       | Pancreas, Leg                                 | Kidneys                                       |
| Long-chain carnitines (C14-C20)        | Intestine, Pancreas, Leg, Ear                 | Heart, Kidneys                                |

**Table S1. Sources and sinks of metabolites (continued).** Related to Fig. 1.

| Metabolites               | Produced                        | Consumed                                         |
|---------------------------|---------------------------------|--------------------------------------------------|
| Nicotinamide              | Spleen                          | Leg, Colon                                       |
| Ornithine, Citrulline     | Intestine                       | Spleen, Leg, Kidneys                             |
| Creatine                  | Liver, Heart                    | Intestine, Leg                                   |
| Creatinine                | Liver, Leg                      | Intestine, Colon, Kidneys                        |
| D-gluconate               | Colon, Pancreas, Spleen, Brain  | Leg                                              |
| Allantoin                 | Liver                           | Intestine, Colon, Pancreas, Spleen, Kidneys, Ear |
| Allantoate                | Kidneys                         | Head                                             |
| Benzoic acid              | Colon, Ear                      | -                                                |
| Biotin                    | Spleen, Heart                   | Intestine, Kidneys                               |
| Capryloyl glycine         | Liver, Pancreas                 | Kidneys                                          |
| Carnosine                 | Liver                           | Kidneys, Ear                                     |
| Citramalic acid           | Colon, Pancreas, Head, Leg      | Liver, Kidneys                                   |
| Dihydroxymandelic acid    | Intestine, Colon                | Spleen, Head, Kidneys                            |
| Gluconolactone            | Brain                           | -                                                |
| Glycerate                 | Liver, Lung                     | Kidneys                                          |
| Glycerol-3-phosphate      | Liver, Pancreas, Spleen         | Leg, Kidneys                                     |
| Glycyl-L-proline          | Leg                             | -                                                |
| Guanine                   | Spleen, Leg, Ear                | Kidneys                                          |
| Glycocyamine              | Kidneys                         | Liver                                            |
| Homocysteine              | Liver                           | Intestine, Colon                                 |
| Homogentisic acid         | Liver, Leg                      | Kidneys                                          |
| Hypotaurine               | Colon, Spleen, Leg, Heart       | Liver                                            |
| L-Threonic acid           | Liver, Lung                     | Kidneys                                          |
| m-Coumaric acid           | Intestine, Colon                | Brain                                            |
| Methylcysteine            | Liver                           | Intestine, Colon                                 |
| Methylmalonic acid        | Intestine, Colon, Pancreas, Leg | Liver, Kidneys                                   |
| m-Hydroxyhippuric acid    | Liver                           | Leg, Kidneys, Ear                                |
| N-Tiglylglycine           | Liver, Spleen                   | Kidneys                                          |
| O-Phosphorylethanolamine  | Pancreas, Spleen                | Leg, Kidneys                                     |
| Phenol sulphate           | Liver                           | Intestine, Colon, Pancreas, Spleen, Kidneys      |
| Phenylacetate             | Intestine, Colon, Kidneys       | Liver                                            |
| Phenylpropionylglycine    | Lung                            | Leg, Kidneys                                     |
| Propionyl-glycine         | Liver                           | Intestine, Colon, Pancreas, Spleen, Leg, Kidneys |
| S-methyl-5'-thioadenosine | Pancreas                        | Kidneys                                          |
| Synephrine                | Colon, Head                     | Liver, Leg, Kidneys                              |

**Table S1. Sources and sinks of metabolites (continued).** Related to Fig. 1.

| Metabolites                     | Produced                                 | Consumed                                  |
|---------------------------------|------------------------------------------|-------------------------------------------|
| Thymine                         | Intestine, Colon, Pancreas, Spleen, Head | Liver, Kidneys                            |
| Triethanolamine                 | Liver                                    | Leg, Kidneys                              |
| Uracil                          | Leg                                      | Kidneys                                   |
| Uric acid                       | Head, Skin                               | Spleen, Kidneys                           |
| Xanthine                        | Intestine, Colon                         | Liver                                     |
| 1-methyl-histidine              | Liver                                    | Intestine, Colon, Pancreas                |
| 3-hydroxyanthranilic acid       | Liver, Lung, Ear                         | Kidneys                                   |
| 3-hydroxyphenyllactate          | Leg                                      | Kidneys                                   |
| Phenylpropionic acid            | Intestine, Colon                         | Liver, Kidneys                            |
| 2-hydroxybutyrate               | Liver, Ear                               | -                                         |
| 3-hydroxyisobutyrate            | Liver                                    | Intestine, Pancreas, Spleen, Leg, Kidneys |
| 2-Isopropylmalic acid           | Liver                                    | Colon, Head                               |
| 3-4-dihydroxyhydrocinnamic acid | Leg                                      | Kidneys                                   |
| 4-pyridoxic acid                | Liver                                    | Kidneys, Ear                              |
| 5-aminolevulinic acid           | Leg                                      | Colon, Spleen, Kidneys                    |
| Beta-aminoisobutyric acid       | Liver                                    | Intestine, Pancreas, Ear                  |
| Cinnamoylglycine                | Colon, Ear                               | Leg, Kidneys                              |
| Dehydroascorbic acid            | Spleen, Lung                             | -                                         |
| D-Galactonic acid               | Colon, Pancreas, Spleen                  | Kidneys                                   |
| Dimethylglycine                 | Liver                                    | Intestine, Colon, Spleen                  |
| 5-Hydroxylysine                 | Ear                                      | Intestine, Colon, Pancreas                |
| L-Rhamnose                      | Liver                                    | Intestine, Colon, Pancreas                |
| Pipecolic acid                  | Liver                                    | Intestine, Colon, Spleen                  |
| Sorbitol                        | Spleen, Leg, Ear                         | Kidneys                                   |
| Ureidopropionic acid            | -                                        | Liver, Kidneys                            |

**Table S1. Sources and sinks of metabolites. Related to Fig. 1.**
